# Supplementary material for: Nasal transcriptome and epigenome analysis identifies the pathogenic features of aspirin-exacerbated respiratory disease
Source: Research Square preprint supplement (doi:10.21203/rs.3.rs-1756470/v1), 2022-07-11
Supplement: Supplementary file 1 [file 27357db69c720ad10e5e10a8.docx]

**Supplementary Tables**

**Supplementary Table 1. Trimming statistics on demultiplexed reads by sample**

| **Group** | **#read** | **#read** | **Total bp** | **Passing filter** | **Read1** | **Read2** |
| --- | --- | --- | --- | --- | --- | --- |
| **(before)** | **(after)** | **(passing)** | **(%)** | **(bp)** | **(bp)** |
| **ATA** | 32,534,503 | 32,488,677 | 6,493,239,915 | 98.8 | 3,248,646,607 | 3,244,593,308 |
| 31,682,554 | 31,665,758 | 6,337,271,368 | 99 | 3,169,842,387 | 3,167,428,981 |
| 30,692,869 | 30,594,140 | 6,104,522,387 | 98.5 | 3,054,517,154 | 3,050,005,233 |
| 32,244,025 | 32,198,645 | 6,449,452,025 | 99 | 3,227,022,733 | 3,222,429,292 |
| 31,168,045 | 31,106,172 | 6,216,314,613 | 98.7 | 3,110,352,195 | 3,105,962,418 |
| **AERD** | 30,971,547 | 30,921,194 | 6,174,191,038 | 98.7 | 3,088,964,920 | 3,085,226,118 |
| 51,771,055 | 51,763,323 | 10,423,802,202 | 99.7 | 5,214,270,271 | 5,209,531,931 |
| 32,826,963 | 32,747,624 | 6,565,883,557 | 99 | 3,284,389,290 | 3,281,494,267 |
| 38,022,048 | 38,004,756 | 7,649,078,240 | 99.6 | 3,827,342,019 | 3,821,736,221 |
| 39,691,898 | 39,666,957 | 7,977,400,700 | 99.5 | 3,991,565,962 | 3,985,834,738 |

**Supplementary Table 2. Differentially expressed genes between patients with AERD and ATA**

|  | **Gene name** | **logFC** | **logCPM** | ***P* value** | **FDR** |
| --- | --- | --- | --- | --- | --- |
| 1 | PRB1 | 3.797891389 | 3.548302736 | 3.90E-09 | 5.10E-07 |
| 2 | SSUH2 | 2.964453227 | 3.332537106 | 3.33E-07 | 2.54E-05 |
| 3 | LOC100505841 | 2.699942129 | 2.358129156 | 0.004005044 | 0.050323138 |
| 4 | LOC101928270 | 2.601937154 | 2.172564294 | 0.016241615 | 0.146959633 |
| 5 | SCGB3A1 | 2.534401026 | 9.303900687 | 2.59E-08 | 2.73E-06 |
| 6 | ECT2L | 2.479407861 | 3.974664003 | 1.06E-07 | 9.18E-06 |
| 7 | PTGFR | 2.478452358 | 3.445391547 | 2.93E-06 | 0.000155768 |
| 8 | C4orf22 | 2.432389783 | 5.157840184 | 2.05E-09 | 2.96E-07 |
| 9 | PZP | 2.423975727 | 3.514396192 | 2.82E-06 | 0.000150592 |
| 10 | DNAH5 | 2.397189182 | 4.316747663 | 2.56E-08 | 2.71E-06 |
| 11 | CES1P1 | 2.387185431 | 2.262782945 | 0.015753046 | 0.143987206 |
| 12 | NELL2 | 2.339099209 | 4.747782446 | 1.08E-08 | 1.29E-06 |
| 13 | SLC23A1 | 2.325460399 | 3.804448291 | 8.53E-07 | 5.71E-05 |
| 14 | HSD17B13 | 2.320503835 | 6.661558396 | 8.50E-09 | 1.05E-06 |
| 15 | LOC541473 | 2.297576207 | 2.235000417 | 0.019900786 | 0.170742964 |
| 16 | TEX26 | 2.291850811 | 5.096558943 | 1.25E-08 | 1.47E-06 |
| 17 | HHLA2 | 2.271422804 | 5.608948231 | 2.80E-09 | 3.86E-07 |
| 18 | CCDC173 | 2.264703812 | 3.790764834 | 1.75E-06 | 0.000105641 |
| 19 | STATH | 2.240862871 | 9.083150884 | 0.002910897 | 0.039706411 |
| 20 | CDKL1 | 2.209699961 | 4.005736689 | 6.28E-07 | 4.43E-05 |
| 21 | APOBEC4 | 2.203829888 | 4.708836353 | 4.32E-08 | 4.23E-06 |
| 22 | CDHR3 | 2.200924883 | 5.541570829 | 9.40E-09 | 1.14E-06 |
| 23 | SNORA7B | 2.200388503 | 3.999521819 | 2.37E-06 | 0.00013098 |
| 24 | SAXO2 | 2.185341225 | 5.715254274 | 1.15E-08 | 1.37E-06 |
| 25 | GJB7 | 2.183193724 | 2.70298369 | 0.002083504 | 0.030591647 |
| 26 | WDR78 | 2.179291601 | 5.510013166 | 1.49E-08 | 1.68E-06 |
| 27 | ZNRD1-AS1 | 2.175129572 | 2.607809294 | 0.00347489 | 0.045322832 |
| 28 | ANKFN1 | 2.172777651 | 2.733355735 | 0.001685246 | 0.026027873 |
| 29 | ANKUB1 | 2.170282799 | 4.513454853 | 9.03E-08 | 8.07E-06 |
| 30 | UCN3 | 2.164074062 | 6.037703337 | 2.40E-07 | 1.90E-05 |
| 31 | ZNF474 | 2.163833448 | 4.855462729 | 3.45E-08 | 3.49E-06 |
| 32 | CCDC170 | 2.161288867 | 5.573500589 | 1.49E-08 | 1.68E-06 |
| 33 | EPPIN-WFDC6 | 2.156320652 | 2.400347123 | 0.012919966 | 0.124382327 |
| 34 | LINC01552 | 2.154102668 | 3.211527307 | 9.46E-05 | 0.002717941 |
| 35 | ANKRD66 | 2.147920611 | 5.640067101 | 1.75E-08 | 1.93E-06 |
| 36 | ERICH3 | 2.145106022 | 5.505525589 | 2.36E-08 | 2.54E-06 |
| 37 | C1orf141 | 2.138939434 | 2.887218159 | 0.000743772 | 0.013637609 |
| 38 | FAM216B | 2.13853987 | 6.405938868 | 5.57E-08 | 5.32E-06 |
| 39 | LRRIQ1 | 2.137804915 | 3.876034186 | 2.24E-06 | 0.000124207 |
| 40 | NEK10 | 2.12383354 | 4.565612027 | 1.20E-07 | 1.02E-05 |
| 41 | CFAP47 | 2.114859241 | 3.538784222 | 1.74E-05 | 0.000674025 |
| 42 | GSTA2 | 2.11399468 | 7.556939679 | 4.76E-06 | 0.000228278 |
| 43 | WFDC6 | 2.101942251 | 5.556105902 | 6.99E-08 | 6.47E-06 |
| 44 | VWA3B | 2.096996996 | 5.10033048 | 6.05E-08 | 5.67E-06 |
| 45 | ACSBG1 | 2.093648179 | 3.427605245 | 4.43E-05 | 0.001449868 |
| 46 | ERBB4 | 2.085140211 | 2.558553886 | 0.006796608 | 0.075927959 |
| 47 | DNAH2 | 2.075308675 | 3.868664462 | 4.67E-06 | 0.00022602 |
| 48 | DAW1 | 2.075234016 | 5.921128455 | 8.85E-08 | 7.95E-06 |
| 49 | SLC4A8 | 2.066702298 | 3.420715689 | 5.11E-05 | 0.001633303 |
| 50 | BEST4 | 2.065424481 | 3.721488203 | 2.00E-05 | 0.00075226 |
| 51 | SPATA4 | 2.061415734 | 4.126275889 | 1.94E-06 | 0.000111852 |
| 52 | LOC101928973 | 2.052408027 | 2.460817342 | 0.012260906 | 0.119973078 |
| 53 | LOC101927136 | 2.047488072 | 3.200935939 | 0.000168096 | 0.00420433 |
| 54 | CFAP43 | 2.034079158 | 4.609895198 | 4.13E-07 | 3.09E-05 |
| 55 | OXTR | 2.025869251 | 4.091276915 | 4.77E-06 | 0.000228278 |
| 56 | CCDC146 | 2.017279405 | 5.593496281 | 9.31E-08 | 8.26E-06 |
| 57 | C6orf165 | 2.004992322 | 5.31201093 | 1.60E-07 | 1.31E-05 |
| 58 | RPRML | 1.998737991 | 2.317435957 | 0.026151454 | 0.206314248 |
| 59 | TIMP4 | 1.990672644 | 4.506986155 | 1.17E-06 | 7.55E-05 |
| 60 | PIH1D3 | 1.987382643 | 4.409011635 | 1.36E-06 | 8.52E-05 |
| 61 | EFHB | 1.987311921 | 5.187863434 | 2.83E-07 | 2.20E-05 |
| 62 | ABCC6P2 | 1.98267638 | 3.048756018 | 0.000574767 | 0.011332612 |
| 63 | SPATA17 | 1.976188964 | 4.529136593 | 8.17E-07 | 5.55E-05 |
| 64 | BTG4 | 1.975416383 | 3.025947771 | 0.000657932 | 0.012314476 |
| 65 | DYDC1 | 1.974346778 | 4.682332291 | 6.79E-07 | 4.75E-05 |
| 66 | EFHC2 | 1.960405068 | 4.675221642 | 5.46E-07 | 3.93E-05 |
| 67 | RSPH4A | 1.954221216 | 6.647695996 | 7.04E-07 | 4.90E-05 |
| 68 | DTHD1 | 1.952811065 | 4.787325755 | 5.41E-07 | 3.91E-05 |
| 69 | CCDC30 | 1.95219039 | 2.744565833 | 0.003792292 | 0.048300816 |
| 70 | CASC1 | 1.948462373 | 5.428723935 | 2.41E-07 | 1.90E-05 |
| 71 | C1GALT1C1L | 1.941077821 | 2.776965604 | 0.003496892 | 0.04553157 |
| 72 | KCNRG | 1.939500486 | 5.086984387 | 4.38E-07 | 3.26E-05 |
| 73 | KIAA2012 | 1.936474057 | 3.550281582 | 5.96E-05 | 0.001834489 |
| 74 | MDH1B | 1.929985801 | 4.344047028 | 2.39E-06 | 0.000131593 |
| 75 | FBXO15 | 1.928298366 | 4.502093894 | 1.84E-06 | 0.000108618 |
| 76 | CFAP58 | 1.923454455 | 3.879443741 | 1.72E-05 | 0.000668397 |
| 77 | IQCH | 1.920691112 | 3.271733302 | 0.000263941 | 0.006034868 |
| 78 | C7orf57 | 1.920138533 | 4.555750008 | 1.33E-06 | 8.38E-05 |
| 79 | ADGB | 1.919813999 | 3.366369743 | 0.00016608 | 0.004174537 |
| 80 | CFAP53 | 1.915034392 | 5.039630782 | 7.44E-07 | 5.16E-05 |
| 81 | ARMC2 | 1.914006982 | 3.818779988 | 2.17E-05 | 0.000804029 |
| 82 | KIF6 | 1.912103018 | 3.000415851 | 0.00100595 | 0.017494078 |
| 83 | SLC6A13 | 1.910876977 | 2.226363676 | 0.048213185 | 0.312633142 |
| 84 | LOC101927311 | 1.909766919 | 4.245744376 | 3.47E-06 | 0.000178521 |
| 85 | TMCO5A | 1.909618376 | 2.849569239 | 0.002577421 | 0.036299073 |
| 86 | KLHDC8A | 1.907092881 | 3.68150251 | 4.17E-05 | 0.001374927 |
| 87 | SLC7A2 | 1.901761464 | 4.28151774 | 3.77E-06 | 0.000190375 |
| 88 | HLA-DQA2 | 1.899821367 | 4.34426298 | 5.92E-06 | 0.000271576 |
| 89 | TCTE1 | 1.899160091 | 4.327799687 | 3.47E-06 | 0.000178521 |
| 90 | ADH6 | 1.897108806 | 3.217887622 | 0.000401363 | 0.008463178 |
| 91 | LOC101927416 | 1.890123436 | 5.776844092 | 1.16E-06 | 7.55E-05 |
| 92 | DNAAF1 | 1.889523537 | 5.744787625 | 4.43E-07 | 3.28E-05 |
| 93 | CCDC33 | 1.886485782 | 5.082089876 | 1.20E-06 | 7.71E-05 |
| 94 | CCDC39 | 1.88562876 | 3.741886179 | 3.69E-05 | 0.001241895 |
| 95 | ARMC3 | 1.880839626 | 5.526777016 | 4.83E-07 | 3.51E-05 |
| 96 | ANKRD45 | 1.878139582 | 4.388779543 | 4.01E-06 | 0.000200033 |
| 97 | CFAP61 | 1.876626261 | 3.744501156 | 4.80E-05 | 0.001563077 |
| 98 | LOC100129973 | 1.874451768 | 2.462282776 | 0.01997665 | 0.171144867 |
| 99 | FAM81B | 1.87102633 | 6.602524227 | 1.90E-06 | 0.000110944 |
| 100 | VIM-AS1 | 1.868477585 | 4.087831831 | 1.11E-05 | 0.000459984 |
| 101 | SLC13A3 | 1.867756428 | 3.429148664 | 0.000202346 | 0.004845452 |
| 102 | FILIP1 | 1.862347169 | 3.145378708 | 0.000627747 | 0.011957043 |
| 103 | DCDC5 | 1.859809835 | 2.73994431 | 0.005652701 | 0.066014003 |
| 104 | ZBBX | 1.859420319 | 4.324261069 | 4.26E-06 | 0.000209121 |
| 105 | NEK11 | 1.859162676 | 5.115619596 | 9.11E-07 | 6.07E-05 |
| 106 | CFAP70 | 1.857608988 | 3.953588571 | 1.80E-05 | 0.000694308 |
| 107 | PPP1R36 | 1.855723701 | 4.670852665 | 2.21E-06 | 0.000123614 |
| 108 | TTC29 | 1.849710132 | 5.19577927 | 1.31E-06 | 8.35E-05 |
| 109 | MAATS1 | 1.84771243 | 4.01937015 | 1.51E-05 | 0.000598743 |
| 110 | CXorf58 | 1.841855251 | 2.350643617 | 0.034939217 | 0.252834698 |
| 111 | SEC14L3 | 1.837394401 | 5.490033482 | 3.87E-06 | 0.000194437 |
| 112 | MUC13 | 1.83569578 | 6.201034512 | 1.24E-06 | 7.92E-05 |
| 113 | OSBPL6 | 1.834711729 | 3.255552687 | 0.000493688 | 0.010042029 |
| 114 | LOC101927267 | 1.83285379 | 3.194964636 | 0.000623223 | 0.011931624 |
| 115 | TSPAN19 | 1.829309475 | 5.035527169 | 1.20E-06 | 7.71E-05 |
| 116 | TMEM213 | 1.828617685 | 4.0985621 | 1.41E-05 | 0.000565033 |
| 117 | PRUNE2 | 1.827443893 | 3.2063946 | 0.000601116 | 0.011641078 |
| 118 | TMEM232 | 1.822584 | 3.285623278 | 0.000456707 | 0.009447655 |
| 119 | DNAH9 | 1.822423378 | 4.721387694 | 4.08E-06 | 0.000202417 |
| 120 | ARMC4 | 1.821243808 | 4.88234904 | 2.11E-06 | 0.000120207 |
| 121 | SHANK2 | 1.819285935 | 2.992651489 | 0.001667693 | 0.025888469 |
| 122 | LMNTD1 | 1.818441923 | 3.594507532 | 0.000111713 | 0.0030996 |
| 123 | GSTA1 | 1.817133276 | 9.870984566 | 0.000100779 | 0.002854524 |
| 124 | ERICH6-AS1 | 1.812602109 | 4.767153431 | 3.27E-06 | 0.000170813 |
| 125 | C10orf107 | 1.812411985 | 6.380917315 | 3.14E-06 | 0.00016537 |
| 126 | PAGE5 | 1.812067475 | 2.384899494 | 0.032224514 | 0.238883094 |
| 127 | NWD1 | 1.811276142 | 5.285291649 | 1.47E-06 | 9.15E-05 |
| 128 | FANK1 | 1.810957059 | 5.720495888 | 1.68E-06 | 0.000102445 |
| 129 | WDR63 | 1.810819284 | 4.431688945 | 6.02E-06 | 0.000275104 |
| 130 | SNTN | 1.810179699 | 8.324819123 | 2.19E-05 | 0.000807907 |
| 131 | NEK5 | 1.807146985 | 3.232953935 | 0.00057781 | 0.011377838 |
| 132 | FAM47E | 1.806582255 | 4.624296679 | 3.35E-06 | 0.000173951 |
| 133 | CCDC81 | 1.802103301 | 4.60589867 | 1.32E-05 | 0.000532984 |
| 134 | STOX1 | 1.799482623 | 4.750914879 | 3.11E-06 | 0.000164471 |
| 135 | WDR93 | 1.798824095 | 3.575199792 | 0.000147726 | 0.003814245 |
| 136 | PNLDC1 | 1.795100492 | 2.474655176 | 0.023352603 | 0.190715021 |
| 137 | CAPS2 | 1.793988189 | 3.266966619 | 0.000558969 | 0.011078685 |
| 138 | TCTEX1D1 | 1.792863713 | 3.327913599 | 0.000452049 | 0.009375701 |
| 139 | EFCAB10 | 1.792833534 | 5.342342035 | 2.14E-06 | 0.000121427 |
| 140 | TMEM212 | 1.792225915 | 3.845274061 | 5.83E-05 | 0.001801737 |
| 141 | SLC47A2 | 1.789336959 | 2.298260663 | 0.049073839 | 0.316254056 |
| 142 | CATSPERD | 1.787221621 | 3.244050409 | 0.000745012 | 0.013643869 |
| 143 | STMND1 | 1.783014332 | 4.914235511 | 5.42E-06 | 0.000254983 |
| 144 | LRRC18 | 1.781479191 | 4.293442363 | 1.46E-05 | 0.000580105 |
| 145 | OR7E47P | 1.781189317 | 4.873525898 | 6.96E-06 | 0.000312486 |
| 146 | KLHL6 | 1.780779779 | 4.567092369 | 5.52E-06 | 0.000258667 |
| 147 | WDR86-AS1 | 1.780176364 | 5.651071399 | 1.54E-06 | 9.50E-05 |
| 148 | LRRC34 | 1.778246502 | 4.431875655 | 7.37E-06 | 0.000328347 |
| 149 | PIFO | 1.777838451 | 7.560067664 | 1.85E-05 | 0.000710042 |
| 150 | LINC01091 | 1.777425434 | 2.664974386 | 0.011005548 | 0.109852884 |
| 151 | LRRC74B | 1.776780188 | 2.930879795 | 0.002943887 | 0.040048465 |
| 152 | PACRG | 1.776755813 | 5.99552123 | 4.65E-06 | 0.000225749 |
| 153 | FAM179A | 1.774667042 | 4.188952501 | 1.60E-05 | 0.000631981 |
| 154 | LDLRAD1 | 1.774258836 | 6.406533686 | 3.60E-06 | 0.000182874 |
| 155 | PRR18 | 1.773666715 | 3.539181415 | 0.000217828 | 0.005151201 |
| 156 | STK33 | 1.773357463 | 4.739273013 | 3.56E-06 | 0.000181775 |
| 157 | C6orf118 | 1.773080416 | 4.463182369 | 8.92E-06 | 0.000381431 |
| 158 | AK7 | 1.772893323 | 5.658839764 | 1.97E-06 | 0.000113034 |
| 159 | FLJ26850 | 1.770474109 | 2.932589799 | 0.002908148 | 0.039704594 |
| 160 | CASC2 | 1.769321033 | 3.342050859 | 0.000502566 | 0.01015972 |
| 161 | DNMBP-AS1 | 1.769050597 | 2.487024838 | 0.024070211 | 0.194580873 |
| 162 | LINC00326 | 1.768991541 | 2.795602767 | 0.005934262 | 0.06846046 |
| 163 | EFCAB2 | 1.767310834 | 4.866222519 | 4.17E-06 | 0.000205696 |
| 164 | SPAG6 | 1.761869792 | 7.089596453 | 1.08E-05 | 0.000449397 |
| 165 | AADACP1 | 1.760306322 | 3.086070574 | 0.001536131 | 0.024293267 |
| 166 | EFCAB1 | 1.75693911 | 6.40326342 | 4.16E-06 | 0.000205645 |
| 167 | EFHC1 | 1.753695113 | 5.269757629 | 2.40E-06 | 0.000131761 |
| 168 | SPATA6L | 1.752037626 | 2.944924118 | 0.002980067 | 0.040287954 |
| 169 | RSPH10B | 1.749111653 | 2.695084187 | 0.010293511 | 0.104253554 |
| 170 | RSPH10B2 | 1.749111653 | 2.695084187 | 0.010293511 | 0.104253554 |
| 171 | FSD1L | 1.747600684 | 3.155852358 | 0.001116426 | 0.018851358 |
| 172 | ENO4 | 1.746444844 | 3.344154773 | 0.00055684 | 0.011051244 |
| 173 | ABCB11 | 1.745970946 | 2.834634274 | 0.005289121 | 0.062489835 |
| 174 | UBXN10 | 1.745749558 | 5.70091228 | 2.55E-06 | 0.000137844 |
| 175 | IQCG | 1.744273255 | 6.595414755 | 6.62E-06 | 0.000298975 |
| 176 | SCARNA16 | 1.742606388 | 3.366482942 | 0.00060981 | 0.011766399 |
| 177 | HEPACAM2 | 1.739587456 | 3.519201304 | 0.000269896 | 0.006152495 |
| 178 | NME9 | 1.737397056 | 3.346645464 | 0.000597349 | 0.011597133 |
| 179 | TTC25 | 1.737024327 | 5.731311022 | 3.58E-06 | 0.000182537 |
| 180 | MAP3K19 | 1.737006564 | 4.953480819 | 3.99E-06 | 0.000199984 |
| 181 | TNFRSF19 | 1.732975384 | 5.169171146 | 3.54E-06 | 0.000181661 |
| 182 | CERKL | 1.732884675 | 4.190559506 | 2.85E-05 | 0.001008624 |
| 183 | ABCC6 | 1.731459053 | 3.26750729 | 0.000852925 | 0.01528821 |
| 184 | LRRC36 | 1.731112284 | 2.971351804 | 0.00296509 | 0.040192854 |
| 185 | CCDC37 | 1.729830699 | 4.572996425 | 7.74E-06 | 0.000340491 |
| 186 | LOC101928075 | 1.726807639 | 2.596215949 | 0.017230218 | 0.153600812 |
| 187 | VWA8-AS1 | 1.724211614 | 2.595565478 | 0.017852925 | 0.158042631 |
| 188 | C16orf71 | 1.723369669 | 4.759882503 | 1.12E-05 | 0.000462706 |
| 189 | C20orf96 | 1.722064459 | 5.313973528 | 4.38E-06 | 0.000214519 |
| 190 | KCNE1 | 1.721115679 | 4.981075771 | 5.08E-06 | 0.00024103 |
| 191 | ENKUR | 1.717273966 | 5.420143908 | 4.72E-06 | 0.000227381 |
| 192 | ALS2CR12 | 1.712494622 | 3.243146691 | 0.001022669 | 0.017643363 |
| 193 | DYX1C1-CCPG1 | 1.711845225 | 2.514464371 | 0.025179271 | 0.201726484 |
| 194 | DCDC1 | 1.709638269 | 2.375787586 | 0.042972606 | 0.290239272 |
| 195 | SH3RF3 | 1.70827506 | 2.385455346 | 0.041415191 | 0.282718266 |
| 196 | CDC14A | 1.698076276 | 3.923731301 | 8.00E-05 | 0.002349236 |
| 197 | COL21A1 | 1.697297437 | 2.751302254 | 0.009764225 | 0.100298014 |
| 198 | EFCAB6 | 1.695403459 | 3.340220901 | 0.000779316 | 0.014169553 |
| 199 | CCDC17 | 1.694393959 | 6.797046971 | 1.48E-05 | 0.000588114 |
| 200 | BTNL8 | 1.690430111 | 2.506677588 | 0.027552641 | 0.213747672 |
| 201 | CCDC176 | 1.689369146 | 5.250208859 | 5.90E-06 | 0.000271356 |
| 202 | MRLN | 1.687832738 | 4.967581514 | 1.02E-05 | 0.000426061 |
| 203 | CCL15-CCL14 | 1.685416186 | 3.461355681 | 0.000548202 | 0.010956187 |
| 204 | REM1 | 1.685391051 | 2.932512137 | 0.004372224 | 0.054002785 |
| 205 | IL5RA | 1.684795559 | 4.073132645 | 5.55E-05 | 0.001745743 |
| 206 | LRRC6 | 1.6818538 | 4.418072692 | 2.13E-05 | 0.000793455 |
| 207 | COLCA1 | 1.68153717 | 4.792721116 | 8.90E-06 | 0.000381431 |
| 208 | TEKT3 | 1.680620746 | 2.508125781 | 0.027568139 | 0.213758672 |
| 209 | C2orf73 | 1.680422328 | 3.082439332 | 0.002260466 | 0.032571918 |
| 210 | NPHP1 | 1.67902209 | 5.112868542 | 6.98E-06 | 0.000312486 |
| 211 | CWH43 | 1.677623557 | 3.23018009 | 0.001370443 | 0.02215769 |
| 212 | ADRA2A | 1.677348853 | 3.542147167 | 0.000431666 | 0.008989789 |
| 213 | C1orf228 | 1.674799442 | 3.665212613 | 0.000247508 | 0.005754471 |
| 214 | DLG2 | 1.673743205 | 2.670638772 | 0.01497511 | 0.138798607 |
| 215 | FHAD1 | 1.673401453 | 4.583609263 | 1.67E-05 | 0.000653584 |
| 216 | CFAP57 | 1.67276618 | 4.6286392 | 1.79E-05 | 0.000693043 |
| 217 | MARCH10 | 1.672331643 | 3.212268777 | 0.001455823 | 0.023241124 |
| 218 | CHST9 | 1.670759606 | 6.553308708 | 1.37E-05 | 0.00055136 |
| 219 | DNAH7 | 1.668887054 | 3.200986092 | 0.001477804 | 0.023567242 |
| 220 | HLA-DRB6 | 1.667487233 | 2.659474715 | 0.017824475 | 0.157882831 |
| 221 | HCG14 | 1.664025665 | 2.555397108 | 0.025222287 | 0.2017611 |
| 222 | CFAP54 | 1.663963103 | 2.486263054 | 0.031720465 | 0.236300342 |
| 223 | LCA5L | 1.659924639 | 3.326173896 | 0.00101703 | 0.01761917 |
| 224 | TXLNB | 1.659414389 | 2.71829357 | 0.012406727 | 0.120820355 |
| 225 | TAT-AS1 | 1.657821922 | 3.216641601 | 0.001566881 | 0.024719126 |
| 226 | SPATA18 | 1.657674888 | 5.949380162 | 8.78E-06 | 0.000377796 |
| 227 | PPP1R42 | 1.656954074 | 3.326664035 | 0.001061036 | 0.018047049 |
| 228 | HMGCS2 | 1.656889217 | 5.846318623 | 6.78E-06 | 0.000305344 |
| 229 | CCDC65 | 1.656649899 | 6.12313113 | 1.09E-05 | 0.000452141 |
| 230 | SLC22A4 | 1.656106707 | 5.544489289 | 1.02E-05 | 0.000426061 |
| 231 | LOC100101148 | 1.654025603 | 3.020782635 | 0.003264134 | 0.043318251 |
| 232 | NEAT1 | 1.653202342 | 7.731752609 | 0.015169077 | 0.14016855 |
| 233 | CCDC148 | 1.651170239 | 2.847077872 | 0.007577216 | 0.081899744 |
| 234 | LRGUK | 1.651002704 | 3.437481428 | 0.000693907 | 0.012840476 |
| 235 | TTC16 | 1.649868241 | 3.526808055 | 0.000508429 | 0.010264594 |
| 236 | DYX1C1 | 1.649439017 | 4.378316852 | 3.34E-05 | 0.001150166 |
| 237 | LRRC48 | 1.646739536 | 6.69886352 | 2.85E-05 | 0.001008624 |
| 238 | ANKDD1B | 1.641131747 | 3.113047867 | 0.002437094 | 0.034579403 |
| 239 | WDR49 | 1.640664246 | 3.476655534 | 0.000633633 | 0.012024774 |
| 240 | C10orf67 | 1.639983368 | 2.449272391 | 0.039143204 | 0.27297755 |
| 241 | FRMPD2 | 1.637493569 | 2.994991343 | 0.00390007 | 0.04923082 |
| 242 | HYDIN | 1.637218477 | 4.091132539 | 8.58E-05 | 0.002494733 |
| 243 | DNAH3 | 1.636527812 | 4.265658953 | 4.71E-05 | 0.001537711 |
| 244 | IQUB | 1.635775477 | 3.725081972 | 0.0002676 | 0.006109338 |
| 245 | STOML3 | 1.63547619 | 6.435663353 | 3.54E-05 | 0.00119865 |
| 246 | UMODL1-AS1 | 1.635046746 | 3.480859116 | 0.00069334 | 0.012840476 |
| 247 | CMBL | 1.633061688 | 3.458498436 | 0.000736466 | 0.013536357 |
| 248 | C1orf168 | 1.632847142 | 2.512359331 | 0.031662656 | 0.235985489 |
| 249 | LCA5 | 1.63218465 | 3.670712939 | 0.000333144 | 0.007287876 |
| 250 | CFAP221 | 1.631622617 | 4.893398817 | 1.44E-05 | 0.000574282 |
| 251 | VWCE | 1.631439087 | 2.760255737 | 0.012319919 | 0.12028361 |
| 252 | CFAP44 | 1.630652604 | 4.064863691 | 9.42E-05 | 0.002713064 |
| 253 | TMEM231 | 1.62946965 | 6.680690689 | 2.52E-05 | 0.000913787 |
| 254 | C1orf158 | 1.627261578 | 5.509642064 | 1.25E-05 | 0.000510611 |
| 255 | RBM24 | 1.625174546 | 3.366196242 | 0.001124769 | 0.018896077 |
| 256 | PLCH1 | 1.62509122 | 3.563053322 | 0.000515439 | 0.010392281 |
| 257 | LINC00908 | 1.625008115 | 2.811991137 | 0.009811282 | 0.100645194 |
| 258 | LRRC49 | 1.624459425 | 3.906233293 | 0.000160355 | 0.00404551 |
| 259 | SRD5A2 | 1.623329029 | 3.774357768 | 0.000302452 | 0.006732884 |
| 260 | TMPRSS3 | 1.621088161 | 4.577547787 | 2.99E-05 | 0.001049901 |
| 261 | CAPN9 | 1.620959438 | 4.793529575 | 1.92E-05 | 0.000727309 |
| 262 | TEX9 | 1.620639481 | 3.98420703 | 0.000125989 | 0.003379448 |
| 263 | CSPP1 | 1.61953902 | 4.260232201 | 5.35E-05 | 0.001699138 |
| 264 | RAB3B | 1.619446282 | 2.477131734 | 0.036892204 | 0.261727777 |
| 265 | DNAH6 | 1.618075714 | 3.320441652 | 0.001292466 | 0.021076498 |
| 266 | MAK | 1.614993087 | 3.306639534 | 0.001392724 | 0.02244621 |
| 267 | CFAP69 | 1.61427694 | 3.347577361 | 0.001283388 | 0.020950967 |
| 268 | SYNE1 | 1.602985958 | 3.105947428 | 0.002974145 | 0.040243733 |
| 269 | USP2-AS1 | 1.601925693 | 2.86481906 | 0.008726986 | 0.092190844 |
| 270 | DNALI1 | 1.601542359 | 6.977771555 | 4.91E-05 | 0.001587127 |
| 271 | IGSF10 | 1.600173211 | 2.890515511 | 0.007396297 | 0.080437381 |
| 272 | ARHGAP18 | 1.599805095 | 5.772634872 | 1.26E-05 | 0.000510672 |
| 273 | SCGB2A1 | 1.59874184 | 7.45481029 | 0.00011602 | 0.003185199 |
| 274 | RCAN3AS | 1.596268713 | 3.491715347 | 0.00089625 | 0.015939746 |
| 275 | LINC01436 | 1.595748135 | 2.818857856 | 0.011637132 | 0.114947915 |
| 276 | DNAH12 | 1.593642363 | 3.916310888 | 0.000192907 | 0.004678451 |
| 277 | NHLRC4 | 1.59334238 | 5.28356785 | 2.65E-05 | 0.000954871 |
| 278 | C11orf88 | 1.59271368 | 7.804721264 | 0.000184913 | 0.004520697 |
| 279 | PPIL6 | 1.592678305 | 4.780682807 | 2.72E-05 | 0.000973763 |
| 280 | DCDC2 | 1.592416917 | 2.428320697 | 0.047587866 | 0.310476571 |
| 281 | CCDC114 | 1.592219935 | 4.87131094 | 2.15E-05 | 0.000797707 |
| 282 | FAM166B | 1.591247976 | 6.461339568 | 4.16E-05 | 0.001374615 |
| 283 | CCDC89 | 1.588638229 | 3.759634073 | 0.000383811 | 0.00819552 |
| 284 | C16orf89 | 1.585286086 | 3.406825361 | 0.001267932 | 0.020720924 |
| 285 | SEPT5-GP1BB | 1.584569596 | 2.963825902 | 0.005843066 | 0.06771712 |
| 286 | MROH9 | 1.584465457 | 3.101015732 | 0.003368105 | 0.044418829 |
| 287 | MYCBPAP | 1.582106377 | 2.561448448 | 0.029388392 | 0.224283849 |
| 288 | RSPH14 | 1.580555942 | 4.785931147 | 5.37E-05 | 0.001699138 |
| 289 | LOC284825 | 1.580291614 | 3.233652673 | 0.002217877 | 0.032129586 |
| 290 | CEP126 | 1.57921589 | 3.172500364 | 0.002641877 | 0.036864873 |
| 291 | ZNF853 | 1.577916498 | 3.39155129 | 0.001386341 | 0.022390882 |
| 292 | WDR38 | 1.577695545 | 7.132739339 | 0.000114187 | 0.003143504 |
| 293 | C11orf16 | 1.576261342 | 4.776335178 | 2.93E-05 | 0.00103391 |
| 294 | PCYT1B | 1.575675797 | 2.847408132 | 0.010115968 | 0.103074246 |
| 295 | AGBL2 | 1.575440209 | 3.573218836 | 0.000655487 | 0.012295136 |
| 296 | CD200R1L | 1.574891312 | 2.719240509 | 0.017060574 | 0.152650098 |
| 297 | VWA3A | 1.570189401 | 4.013563001 | 0.000167367 | 0.004193014 |
| 298 | CCL15 | 1.569008744 | 3.977898111 | 0.000245624 | 0.005719424 |
| 299 | DYNLRB2 | 1.566002617 | 6.505275457 | 0.000154423 | 0.003953531 |
| 300 | DDO | 1.561315244 | 3.272216581 | 0.002198098 | 0.031873471 |
| 301 | TMEM150C | 1.559072358 | 4.510589335 | 5.50E-05 | 0.00173668 |
| 302 | PLCB1 | 1.558961834 | 2.511063633 | 0.039541786 | 0.274621866 |
| 303 | PIH1D2 | 1.557947383 | 4.974629871 | 2.99E-05 | 0.001049648 |
| 304 | LINC00332 | 1.557148025 | 2.855254007 | 0.009545704 | 0.098721303 |
| 305 | PTPRN2 | 1.556347222 | 4.622860496 | 5.77E-05 | 0.001790652 |
| 306 | CCDC181 | 1.555263136 | 4.460021797 | 7.86E-05 | 0.002327146 |
| 307 | ZNF214 | 1.553562025 | 2.963507276 | 0.006719459 | 0.075295785 |
| 308 | LOC101060498 | 1.552095789 | 3.09812117 | 0.004132948 | 0.051597565 |
| 309 | CFAP52 | 1.550598236 | 5.386025628 | 3.20E-05 | 0.00111215 |
| 310 | NCALD | 1.550470146 | 4.333707604 | 0.000111239 | 0.003093097 |
| 311 | CYP2B6 | 1.550389924 | 4.965644962 | 3.48E-05 | 0.001181717 |
| 312 | ACSS3 | 1.550293036 | 3.49678439 | 0.001060586 | 0.018047049 |
| 313 | TUBBP5 | 1.548206805 | 2.952118099 | 0.007600614 | 0.082013162 |
| 314 | RABL2A | 1.547593438 | 4.632988671 | 4.90E-05 | 0.001587127 |
| 315 | MEIG1 | 1.547566038 | 3.081675037 | 0.004618177 | 0.056180415 |
| 316 | DNAH10 | 1.546385043 | 3.468218225 | 0.001199221 | 0.019832874 |
| 317 | KNDC1 | 1.543731771 | 3.475008113 | 0.001262872 | 0.020682757 |
| 318 | GNA14 | 1.543514147 | 4.641423359 | 5.69E-05 | 0.001770995 |
| 319 | LRRC10B | 1.542954597 | 7.094189435 | 0.000157542 | 0.004006368 |
| 320 | CD38 | 1.542421995 | 4.067944732 | 0.000200352 | 0.004812893 |
| 321 | CAPSL | 1.539878008 | 7.844417943 | 0.000385572 | 0.008221358 |
| 322 | SPEF2 | 1.538151066 | 3.619261462 | 0.000750688 | 0.013714741 |
| 323 | PATL2 | 1.536223533 | 2.797270134 | 0.014917903 | 0.13873546 |
| 324 | NME5 | 1.535004646 | 5.841034027 | 3.11E-05 | 0.001089628 |
| 325 | MACROD2 | 1.534761322 | 2.76202858 | 0.017129612 | 0.152977514 |
| 326 | ZMYND12 | 1.53399125 | 4.18705535 | 0.000201936 | 0.004843286 |
| 327 | WDR86 | 1.531893673 | 2.67675301 | 0.023875133 | 0.193524969 |
| 328 | DRC1 | 1.531040171 | 6.864346256 | 0.00010923 | 0.003054006 |
| 329 | SERPINB11 | 1.530529215 | 6.663011459 | 9.08E-05 | 0.002624671 |
| 330 | SPAG17 | 1.528413229 | 3.720381967 | 0.00059638 | 0.011593147 |
| 331 | FBXO36 | 1.524016075 | 4.338464353 | 0.000109048 | 0.003054006 |
| 332 | CCDC13 | 1.523632957 | 3.601189516 | 0.00093819 | 0.016485652 |
| 333 | LOC653513 | 1.519234583 | 2.717384243 | 0.021242298 | 0.178275604 |
| 334 | DZIP1L | 1.517173427 | 3.500487391 | 0.001261266 | 0.020678771 |
| 335 | MLF1 | 1.516896456 | 5.707973377 | 3.76E-05 | 0.001262132 |
| 336 | IQCA1 | 1.515830084 | 3.975475447 | 0.00033143 | 0.007260849 |
| 337 | MNS1 | 1.514030839 | 4.860900956 | 4.93E-05 | 0.001588298 |
| 338 | C1orf64 | 1.511528676 | 2.953491863 | 0.008771066 | 0.092473837 |
| 339 | DNAH11 | 1.508570318 | 3.065808774 | 0.005471666 | 0.064296311 |
| 340 | C1orf87 | 1.508346514 | 5.033591629 | 8.40E-05 | 0.002448244 |
| 341 | DNAI1 | 1.507158005 | 5.213984808 | 4.83E-05 | 0.001567153 |
| 342 | DNAAF3 | 1.504770979 | 5.748491858 | 4.28E-05 | 0.001407604 |
| 343 | ZNF487 | 1.50138193 | 3.745295959 | 0.000676106 | 0.012579225 |
| 344 | CAP2 | 1.499567757 | 3.180749815 | 0.004054643 | 0.050845607 |
| 345 | LINC00883 | 1.498720513 | 3.447102659 | 0.001762729 | 0.026869232 |
| 346 | AKAP14 | 1.494481286 | 6.877080081 | 0.000177355 | 0.004381869 |
| 347 | LRTOMT | 1.49418662 | 5.308264081 | 5.64E-05 | 0.001757591 |
| 348 | MORN5 | 1.493732595 | 7.468373743 | 0.000556857 | 0.011051244 |
| 349 | RSPH1 | 1.493696706 | 8.15445192 | 0.000552811 | 0.011028619 |
| 350 | C9orf72 | 1.492262994 | 4.401139515 | 0.000121337 | 0.003277816 |
| 351 | CACNG6 | 1.491807751 | 5.232928631 | 0.000139622 | 0.003654727 |
| 352 | SPATS1 | 1.491279536 | 3.222134383 | 0.003830033 | 0.048699797 |
| 353 | TEKT1 | 1.490034142 | 7.048764314 | 0.000194571 | 0.004703788 |
| 354 | CC2D2A | 1.48817048 | 5.494659187 | 4.94E-05 | 0.001588298 |
| 355 | TTC26 | 1.486876901 | 4.592747989 | 0.000100583 | 0.002854297 |
| 356 | MAOB | 1.483752416 | 4.602740455 | 0.000111881 | 0.0030996 |
| 357 | ZNF396 | 1.483637944 | 3.03313091 | 0.007296136 | 0.079805433 |
| 358 | C14orf37 | 1.483617946 | 2.708721848 | 0.025226321 | 0.2017611 |
| 359 | CES4A | 1.483449234 | 4.778275625 | 7.96E-05 | 0.002341051 |
| 360 | C9orf135 | 1.482327747 | 7.223790475 | 0.000279627 | 0.006308021 |
| 361 | IFT81 | 1.482304074 | 4.529545088 | 0.000112415 | 0.003108726 |
| 362 | WEE2-AS1 | 1.48229349 | 3.022701075 | 0.00783154 | 0.084086594 |
| 363 | INHBB | 1.480972435 | 4.178091404 | 0.000278203 | 0.006290749 |
| 364 | C4orf47 | 1.480606625 | 3.574098424 | 0.001296411 | 0.021118148 |
| 365 | RHOU | 1.480192433 | 4.602272557 | 9.47E-05 | 0.002717941 |
| 366 | TMEM67 | 1.479105381 | 4.173294714 | 0.000242713 | 0.005660779 |
| 367 | FBXL13 | 1.47667984 | 2.781406813 | 0.019462502 | 0.168556588 |
| 368 | CLDN8 | 1.475109908 | 3.253089621 | 0.003837146 | 0.04874941 |
| 369 | PKIB | 1.474938225 | 4.605309114 | 0.000117118 | 0.003197985 |
| 370 | MAP6 | 1.474913962 | 5.538024848 | 7.91E-05 | 0.002337016 |
| 371 | LRP2BP | 1.473358482 | 2.827366078 | 0.01652868 | 0.149013316 |
| 372 | EML1 | 1.473217385 | 3.661642538 | 0.001099493 | 0.018609254 |
| 373 | ADPRHL1 | 1.473015812 | 3.8614794 | 0.000628489 | 0.011957043 |
| 374 | DYNC2H1 | 1.47295912 | 3.54223137 | 0.001492691 | 0.023720628 |
| 375 | PAMR1 | 1.47219132 | 2.560722084 | 0.043002329 | 0.290239272 |
| 376 | MUC15 | 1.471183598 | 5.1343958 | 6.42E-05 | 0.001952992 |
| 377 | IFT57 | 1.470686117 | 6.478692036 | 0.000111021 | 0.003093097 |
| 378 | TTLL10 | 1.470403413 | 4.816352734 | 9.36E-05 | 0.002702232 |
| 379 | LOC730101 | 1.469932063 | 3.469933989 | 0.001891277 | 0.028233392 |
| 380 | TCTEX1D4 | 1.469262924 | 5.537151416 | 0.00013389 | 0.003518494 |
| 381 | PROCA1 | 1.467973607 | 2.768789404 | 0.021178299 | 0.178033736 |
| 382 | LOC100506990 | 1.467695394 | 4.739047558 | 0.000114294 | 0.003143504 |
| 383 | C11orf63 | 1.467088231 | 3.686572832 | 0.001028319 | 0.01772071 |
| 384 | LINC00284 | 1.465752519 | 2.686144889 | 0.030723624 | 0.231142747 |
| 385 | CFAP74 | 1.464928058 | 3.179213808 | 0.004779327 | 0.057541428 |
| 386 | LY6H | 1.464828596 | 3.961705446 | 0.000588017 | 0.011489414 |
| 387 | DZANK1 | 1.462410065 | 3.120031896 | 0.005884262 | 0.067986963 |
| 388 | FBLN5 | 1.459822036 | 4.431447371 | 0.000176085 | 0.004368176 |
| 389 | DIXDC1 | 1.458486338 | 3.263850525 | 0.003855424 | 0.04889979 |
| 390 | LOC101927365 | 1.454613964 | 2.871634759 | 0.015303846 | 0.141156126 |
| 391 | FXYD1 | 1.454601539 | 4.1029381 | 0.000585592 | 0.011471557 |
| 392 | RPGR | 1.453329349 | 4.219562554 | 0.000283877 | 0.006384912 |
| 393 | VWA7 | 1.45305572 | 4.847025299 | 9.87E-05 | 0.00280786 |
| 394 | RGS22 | 1.452361234 | 3.251218494 | 0.004401681 | 0.05419815 |
| 395 | RABL2B | 1.451723662 | 5.818131701 | 6.77E-05 | 0.002057042 |
| 396 | DNAJB13 | 1.45154455 | 4.83570509 | 0.000159402 | 0.004033617 |
| 397 | C11orf70 | 1.451032982 | 5.636563341 | 7.33E-05 | 0.002200317 |
| 398 | C15orf26 | 1.44784545 | 4.822980421 | 0.000107506 | 0.003022522 |
| 399 | CNGA4 | 1.447451881 | 3.559544795 | 0.001868649 | 0.02806115 |
| 400 | KIAA1257 | 1.447091584 | 2.96284286 | 0.010905794 | 0.109000504 |
| 401 | SLCO1B3 | 1.446956196 | 3.995119176 | 0.000654302 | 0.012294067 |
| 402 | SYS1-DBNDD2 | 1.446912398 | 3.214520103 | 0.004905379 | 0.058640523 |
| 403 | RFX3 | 1.446386784 | 3.730120172 | 0.001043962 | 0.017901627 |
| 404 | CCDC108 | 1.445683412 | 4.575453153 | 0.000155579 | 0.003976429 |
| 405 | USP51 | 1.44504421 | 2.755733055 | 0.024082299 | 0.194580873 |
| 406 | DZIP3 | 1.444416597 | 4.69208759 | 0.0001238 | 0.003326605 |
| 407 | PPP1R32 | 1.439714048 | 4.58582621 | 0.000256569 | 0.005901856 |
| 408 | CFAP126 | 1.438657419 | 8.107169603 | 0.000838933 | 0.015126694 |
| 409 | KCNH3 | 1.438061076 | 3.718031444 | 0.001216075 | 0.020062417 |
| 410 | KIF19 | 1.437080649 | 5.064694658 | 0.000103158 | 0.002916466 |
| 411 | LDLRAD4 | 1.435446728 | 2.837007245 | 0.018584269 | 0.162940847 |
| 412 | PRR29 | 1.433774643 | 5.520868475 | 8.79E-05 | 0.002552987 |
| 413 | NSUN7 | 1.433397066 | 4.228900088 | 0.000306269 | 0.006807876 |
| 414 | SPATA6 | 1.433200435 | 3.945276444 | 0.00062668 | 0.011957043 |
| 415 | DRC7 | 1.433034496 | 4.291059401 | 0.000284404 | 0.006387314 |
| 416 | CFAP45 | 1.432139122 | 6.905653907 | 0.000309198 | 0.006859818 |
| 417 | FTO-IT1 | 1.431892563 | 3.189799836 | 0.00585564 | 0.067759398 |
| 418 | SEPP1 | 1.431324661 | 6.519720884 | 0.000221373 | 0.005218764 |
| 419 | CES1 | 1.430769467 | 8.690430066 | 0.001938752 | 0.028793301 |
| 420 | TUB | 1.428783516 | 2.928765409 | 0.013265336 | 0.12692685 |
| 421 | TSGA10 | 1.427562913 | 4.000822495 | 0.000585338 | 0.011471557 |
| 422 | FOXJ1 | 1.425218464 | 8.304765068 | 0.000873503 | 0.015601783 |
| 423 | CXCR6 | 1.424239059 | 3.334417056 | 0.004085969 | 0.05118249 |
| 424 | RORC | 1.42325655 | 4.687278748 | 0.000144765 | 0.003769861 |
| 425 | C22orf23 | 1.422745014 | 3.817246508 | 0.001008024 | 0.017510091 |
| 426 | IQCD | 1.422368126 | 5.37267903 | 0.000120033 | 0.003254192 |
| 427 | TUBA1A | 1.421693367 | 9.61919975 | 0.001837113 | 0.027752284 |
| 428 | GSTA3 | 1.421485915 | 4.476024816 | 0.000215542 | 0.00510508 |
| 429 | PDE8B | 1.420952311 | 3.110077058 | 0.007483043 | 0.081206257 |
| 430 | BBS12 | 1.419837868 | 3.456570311 | 0.002797122 | 0.038640492 |
| 431 | CROCCP2 | 1.419195711 | 4.303041423 | 0.000286961 | 0.006435206 |
| 432 | CCDC42B | 1.416807477 | 6.107271789 | 0.000157348 | 0.004006368 |
| 433 | LINC01571 | 1.414951424 | 4.032026368 | 0.000717725 | 0.013223908 |
| 434 | CCDC103 | 1.412545233 | 5.209472843 | 0.000118377 | 0.003220796 |
| 435 | IFT88 | 1.412422129 | 4.215786935 | 0.00038356 | 0.00819552 |
| 436 | EFCAB12 | 1.412263482 | 4.593603645 | 0.0002105 | 0.004993452 |
| 437 | WBSCR28 | 1.412126298 | 2.588256075 | 0.047815551 | 0.311479695 |
| 438 | CCDC113 | 1.411701174 | 5.418913197 | 0.000117918 | 0.003214067 |
| 439 | LRRC46 | 1.411489238 | 7.155156727 | 0.00058974 | 0.01150826 |
| 440 | C11orf53 | 1.411063389 | 3.087613966 | 0.008944765 | 0.093759667 |
| 441 | LOC730202 | 1.410543928 | 4.610161204 | 0.000205444 | 0.004896477 |
| 442 | ANKMY1 | 1.409889464 | 4.891005179 | 0.000147569 | 0.003814245 |
| 443 | ADCY2 | 1.408034899 | 3.062800862 | 0.009555953 | 0.098760023 |
| 444 | HGD | 1.407874403 | 3.079010513 | 0.009494674 | 0.098327514 |
| 445 | PTGER2 | 1.407545403 | 3.466244529 | 0.003003471 | 0.040460252 |
| 446 | DNAL1 | 1.405353596 | 4.342945321 | 0.000321445 | 0.00708354 |
| 447 | ROPN1L | 1.405248536 | 7.821248134 | 0.000900083 | 0.015982521 |
| 448 | C11orf97 | 1.404989596 | 6.172097118 | 0.000361311 | 0.007780748 |
| 449 | WDR19 | 1.403751327 | 4.149348702 | 0.00049662 | 0.010079794 |
| 450 | ENPP3 | 1.403445428 | 3.855194542 | 0.001206867 | 0.019937597 |
| 451 | BAIAP3 | 1.402633177 | 5.172537745 | 0.000121825 | 0.003285151 |
| 452 | UCKL1-AS1 | 1.402470919 | 3.763264247 | 0.001364394 | 0.022106971 |
| 453 | LOC100506844 | 1.401774679 | 5.668326569 | 0.000192899 | 0.004678451 |
| 454 | DNAJA4 | 1.400537352 | 7.294024976 | 0.000462328 | 0.009536766 |
| 455 | FAM229B | 1.400057296 | 5.239203569 | 0.000147608 | 0.003814245 |
| 456 | LZTFL1 | 1.398989943 | 5.001716581 | 0.0001387 | 0.003636859 |
| 457 | TSPAN8 | 1.398561834 | 7.701634118 | 0.000592602 | 0.01154928 |
| 458 | BTC | 1.394911906 | 3.499354261 | 0.002804871 | 0.038712315 |
| 459 | C5orf49 | 1.393065538 | 6.656485054 | 0.000567617 | 0.01122079 |
| 460 | ZNF204P | 1.391055749 | 3.564951098 | 0.002331869 | 0.033272971 |
| 461 | C2orf40 | 1.390769069 | 6.408159957 | 0.000466168 | 0.009602932 |
| 462 | CCDC40 | 1.389184126 | 4.137442355 | 0.000580245 | 0.011410981 |
| 463 | CCL28 | 1.388256344 | 4.946066659 | 0.000167059 | 0.004192205 |
| 464 | TSNAXIP1 | 1.387570194 | 4.563216011 | 0.000260529 | 0.005974841 |
| 465 | VSTM2L | 1.384553608 | 5.766341339 | 0.000127345 | 0.00339184 |
| 466 | RFX2 | 1.383428122 | 4.977931344 | 0.000180309 | 0.004429543 |
| 467 | CFAP99 | 1.382655368 | 3.370767153 | 0.004383388 | 0.054046193 |
| 468 | LINC00969 | 1.382266028 | 2.860500421 | 0.021575469 | 0.180373774 |
| 469 | TUBA4B | 1.381422218 | 6.109130885 | 0.000220211 | 0.005199455 |
| 470 | LOC728392 | 1.381420432 | 4.955656599 | 0.00026209 | 0.006001586 |
| 471 | STX2 | 1.381127147 | 3.38514665 | 0.004277656 | 0.053114329 |
| 472 | CDHR4 | 1.37897735 | 4.52713777 | 0.000301663 | 0.006725185 |
| 473 | CCDC78 | 1.378325057 | 6.198860964 | 0.000235533 | 0.00552683 |
| 474 | LXN | 1.377806792 | 6.442226402 | 0.000242733 | 0.005660779 |
| 475 | C1orf189 | 1.376630632 | 5.86375271 | 0.000473353 | 0.009711418 |
| 476 | CLMN | 1.376500922 | 4.349717421 | 0.000407215 | 0.008562789 |
| 477 | SPA17 | 1.374790894 | 7.283345658 | 0.000798354 | 0.014481014 |
| 478 | C9orf117 | 1.374146329 | 4.501980468 | 0.000340758 | 0.007433034 |
| 479 | AKAP6 | 1.37370875 | 2.969882772 | 0.01457489 | 0.136674477 |
| 480 | LRRC43 | 1.373692154 | 3.988242828 | 0.001000705 | 0.017442828 |
| 481 | SLC51B | 1.372660395 | 2.862930542 | 0.022094429 | 0.183205273 |
| 482 | BPIFB2 | 1.372197908 | 6.087169946 | 0.000661753 | 0.012357616 |
| 483 | FAM92B | 1.372138667 | 6.095936267 | 0.000251462 | 0.005819662 |
| 484 | RAB36 | 1.371821687 | 5.264988063 | 0.000171347 | 0.004278601 |
| 485 | USH1C | 1.369686377 | 3.092161501 | 0.010422131 | 0.104995879 |
| 486 | MAP9 | 1.368060468 | 3.32893537 | 0.005359176 | 0.063170035 |
| 487 | GRAMD2 | 1.367889916 | 3.555777949 | 0.002825777 | 0.03896544 |
| 488 | C10orf95 | 1.367612709 | 5.362122113 | 0.000234499 | 0.005511096 |
| 489 | C9orf24 | 1.358394459 | 9.035969635 | 0.003961522 | 0.049829188 |
| 490 | C16orf46 | 1.3578152 | 3.381447552 | 0.005019031 | 0.059628238 |
| 491 | MS4A8 | 1.356608188 | 6.466965174 | 0.000620776 | 0.011914809 |
| 492 | ATF7IP2 | 1.356245733 | 3.091273691 | 0.011121985 | 0.110578899 |
| 493 | ENPP5 | 1.350506259 | 4.683421636 | 0.00032147 | 0.00708354 |
| 494 | IP6K3 | 1.348820266 | 3.830430288 | 0.001595642 | 0.025025857 |
| 495 | EID2B | 1.347153467 | 2.648382559 | 0.048110667 | 0.312277105 |
| 496 | TBC1D8 | 1.3448565 | 5.717895859 | 0.000278122 | 0.006290749 |
| 497 | ZNF844 | 1.344519605 | 2.817914061 | 0.029147164 | 0.223040442 |
| 498 | CALML4 | 1.343444359 | 5.046160179 | 0.00025221 | 0.005828083 |
| 499 | LRRC23 | 1.34340101 | 7.881354221 | 0.001615539 | 0.025300827 |
| 500 | HMGN5 | 1.343297173 | 3.332769696 | 0.006203685 | 0.07086858 |
| 501 | EPDR1 | 1.342075761 | 4.048903407 | 0.001052185 | 0.017968814 |
| 502 | SMKR1 | 1.341787755 | 3.663027065 | 0.002626132 | 0.036784965 |
| 503 | GLB1L | 1.339435235 | 5.355781042 | 0.000253244 | 0.005843092 |
| 504 | EFCAB7 | 1.338695358 | 3.444361408 | 0.004640955 | 0.056288518 |
| 505 | PLEKHB1 | 1.338592507 | 5.560180659 | 0.000275684 | 0.00626563 |
| 506 | TPPP3 | 1.338171198 | 10.20496531 | 0.004570301 | 0.055769225 |
| 507 | MORN3 | 1.337463888 | 4.72453696 | 0.000423165 | 0.008836982 |
| 508 | ERICH5 | 1.336589753 | 5.861066782 | 0.00030951 | 0.006859818 |
| 509 | CCDC60 | 1.335144248 | 4.605498843 | 0.00044778 | 0.009312605 |
| 510 | SAMHD1 | 1.332670462 | 6.593055393 | 0.000456763 | 0.009447655 |
| 511 | ZC2HC1C | 1.331631562 | 3.243947155 | 0.008501136 | 0.090254718 |
| 512 | MOK | 1.329759496 | 4.512276324 | 0.000479733 | 0.009829022 |
| 513 | MAPK8IP1 | 1.329483292 | 5.920856542 | 0.000320855 | 0.00708354 |
| 514 | IRAK1BP1 | 1.328481507 | 2.759405037 | 0.036183545 | 0.258688596 |
| 515 | FAXDC2 | 1.326924558 | 3.920396882 | 0.001485483 | 0.023664858 |
| 516 | CYGB | 1.326732361 | 3.125929542 | 0.011825553 | 0.116354863 |
| 517 | PROS1 | 1.325516965 | 3.927719699 | 0.001569572 | 0.024719126 |
| 518 | CCDC157 | 1.325077139 | 3.926457245 | 0.001493671 | 0.023720628 |
| 519 | PROM1 | 1.32452951 | 7.647693588 | 0.001084442 | 0.018395522 |
| 520 | MORN2 | 1.324373798 | 8.089686941 | 0.001875961 | 0.028087126 |
| 521 | ZBED5-AS1 | 1.323947862 | 6.209436462 | 0.00042738 | 0.008912761 |
| 522 | ASTN2 | 1.322979364 | 3.051389944 | 0.014694604 | 0.137372828 |
| 523 | TCTN2 | 1.320964697 | 5.06609715 | 0.000293236 | 0.006566235 |
| 524 | MTURN | 1.320079423 | 4.913368491 | 0.000334271 | 0.007302011 |
| 525 | FAM149A | 1.319046624 | 3.950887635 | 0.00157642 | 0.02477558 |
| 526 | CCDC151 | 1.316487104 | 4.2139535 | 0.001046768 | 0.017901627 |
| 527 | C20orf85 | 1.315795847 | 9.678642904 | 0.005136579 | 0.06078219 |
| 528 | C2orf50 | 1.314978844 | 3.43791779 | 0.005698207 | 0.066342159 |
| 529 | KIF21A | 1.313640901 | 5.516632843 | 0.0003204 | 0.00708354 |
| 530 | RAMP1 | 1.311259573 | 5.594415823 | 0.000376534 | 0.008062815 |
| 531 | C9orf116 | 1.310930861 | 8.401673825 | 0.002987558 | 0.040317424 |
| 532 | GRIN3B | 1.309107658 | 3.939294083 | 0.001799522 | 0.027293048 |
| 533 | METTL7A | 1.307628489 | 6.758001145 | 0.000641891 | 0.01210955 |
| 534 | CYB5D1 | 1.30545423 | 5.128500059 | 0.000357029 | 0.007721388 |
| 535 | FOLR1 | 1.305347828 | 5.532524384 | 0.00029375 | 0.006568051 |
| 536 | CDC37L1-AS1 | 1.30525158 | 3.940851622 | 0.001771922 | 0.026982265 |
| 537 | GPR162 | 1.303916312 | 5.712479668 | 0.000351306 | 0.007619321 |
| 538 | ICA1L | 1.303831835 | 2.874724396 | 0.027395069 | 0.213221462 |
| 539 | C2orf81 | 1.302428879 | 5.129457676 | 0.000399414 | 0.00843381 |
| 540 | MAPK15 | 1.301993735 | 5.14971742 | 0.000325115 | 0.007143127 |
| 541 | KANSL1L | 1.301643693 | 3.139600104 | 0.01226914 | 0.119973078 |
| 542 | TEKT2 | 1.299331751 | 5.315355029 | 0.000374202 | 0.008024202 |
| 543 | DCDC2B | 1.299249131 | 5.145991238 | 0.000541185 | 0.010882471 |
| 544 | TTC21A | 1.297233249 | 4.519598167 | 0.000655978 | 0.012295136 |
| 545 | CATIP | 1.294938266 | 5.233464456 | 0.00065417 | 0.012294067 |
| 546 | CHAD | 1.294742342 | 5.419165773 | 0.000396467 | 0.00839492 |
| 547 | ST8SIA4 | 1.294581753 | 3.464472875 | 0.00608613 | 0.069735566 |
| 548 | NBPF1 | 1.292059853 | 4.077724451 | 0.001390903 | 0.022440689 |
| 549 | SDK1 | 1.290610411 | 3.894588588 | 0.002193324 | 0.031873471 |
| 550 | MDM1 | 1.289130173 | 3.933203857 | 0.001942599 | 0.028801314 |
| 551 | ARL6 | 1.286830212 | 3.624303959 | 0.004055726 | 0.050845607 |
| 552 | SMPD3 | 1.282391712 | 4.500668934 | 0.000753114 | 0.013726019 |
| 553 | WDR31 | 1.280177039 | 3.404451213 | 0.007155928 | 0.07866857 |
| 554 | CCDC74A | 1.279822985 | 6.242832401 | 0.000571108 | 0.01127511 |
| 555 | IGFBP7 | 1.277763741 | 8.773399997 | 0.003598978 | 0.046422844 |
| 556 | IFT140 | 1.277614299 | 4.713184244 | 0.000609943 | 0.011766399 |
| 557 | C8orf37 | 1.274461376 | 2.791850802 | 0.039400218 | 0.274014706 |
| 558 | EFNB3 | 1.273600558 | 3.938943158 | 0.002494472 | 0.035294569 |
| 559 | CYP39A1 | 1.272011069 | 2.802957899 | 0.038840125 | 0.271884041 |
| 560 | FOXA3 | 1.271756922 | 3.858478136 | 0.003066 | 0.041156515 |
| 561 | RPL32P3 | 1.270202413 | 3.117983891 | 0.015342832 | 0.141429801 |
| 562 | RIBC1 | 1.269052787 | 5.648385365 | 0.000494098 | 0.010042029 |
| 563 | SNCAIP | 1.267494594 | 3.584023467 | 0.004964012 | 0.05918126 |
| 564 | MAP1A | 1.267216996 | 4.226946308 | 0.001367503 | 0.022133722 |
| 565 | IFT172 | 1.266082196 | 5.29634604 | 0.000498938 | 0.01011333 |
| 566 | C1orf110 | 1.265257951 | 6.057097427 | 0.000565463 | 0.011192776 |
| 567 | C9orf171 | 1.264032675 | 5.078639533 | 0.000587188 | 0.011487997 |
| 568 | FAM81A | 1.26402077 | 2.881681849 | 0.031211706 | 0.23365686 |
| 569 | HHAT | 1.263896403 | 3.797007349 | 0.003177382 | 0.04242658 |
| 570 | FMO3 | 1.260542584 | 7.624239451 | 0.002037114 | 0.029997547 |
| 571 | SRP14-AS1 | 1.260102896 | 3.038299365 | 0.020068425 | 0.171746802 |
| 572 | LRRC56 | 1.258901375 | 4.634480689 | 0.000752452 | 0.013726019 |
| 573 | GAS2L2 | 1.258699276 | 5.003682644 | 0.000642089 | 0.01210955 |
| 574 | BCO2 | 1.257825987 | 3.108571349 | 0.016910946 | 0.151733672 |
| 575 | ORAI2 | 1.257527056 | 3.760138915 | 0.00375117 | 0.047857361 |
| 576 | CCDC66 | 1.257066987 | 3.315945545 | 0.010191183 | 0.103631975 |
| 577 | KIF27 | 1.255377811 | 3.062525134 | 0.018512028 | 0.162738628 |
| 578 | CMPK2 | 1.254404934 | 3.958398191 | 0.00237703 | 0.033821999 |
| 579 | BPIFA1 | 1.25368733 | 13.95646248 | 0.006705553 | 0.075295785 |
| 580 | ZNF20 | 1.24928593 | 3.78091786 | 0.003736856 | 0.047747482 |
| 581 | STPG1 | 1.249197104 | 4.724105796 | 0.000805853 | 0.014582189 |
| 582 | BASP1 | 1.247170062 | 7.05490991 | 0.00169692 | 0.026164389 |
| 583 | ANKRD37 | 1.244413036 | 5.238227689 | 0.000617333 | 0.011863725 |
| 584 | CTNNAL1 | 1.24419328 | 5.133675611 | 0.000635041 | 0.012036436 |
| 585 | C17orf97 | 1.243840038 | 5.520236144 | 0.000667026 | 0.012440775 |
| 586 | C1orf194 | 1.24353823 | 7.229211471 | 0.00283694 | 0.039013067 |
| 587 | CORO2B | 1.243218646 | 2.826327965 | 0.039946682 | 0.276500896 |
| 588 | CAPS | 1.243061287 | 10.14874474 | 0.009848372 | 0.100957449 |
| 589 | PKIG | 1.242964825 | 6.845558924 | 0.001666557 | 0.025888469 |
| 590 | DLEC1 | 1.24225277 | 3.739084422 | 0.00412951 | 0.051597565 |
| 591 | ARHGAP44 | 1.240328507 | 3.183642046 | 0.01499105 | 0.138861576 |
| 592 | CCDC180 | 1.239711978 | 3.991062725 | 0.002583172 | 0.036346355 |
| 593 | DNER | 1.239377901 | 4.050606417 | 0.002280692 | 0.032696376 |
| 594 | TCTN1 | 1.236235295 | 5.426033592 | 0.000627722 | 0.011957043 |
| 595 | GALNT6 | 1.235573855 | 3.996017281 | 0.002518281 | 0.035565149 |
| 596 | SYTL3 | 1.23308363 | 4.615239514 | 0.001047072 | 0.017901627 |
| 597 | MAPK10 | 1.232075025 | 4.298124174 | 0.001433318 | 0.022976336 |
| 598 | DYDC2 | 1.231657536 | 4.910654768 | 0.000749774 | 0.013714546 |
| 599 | KIAA1407 | 1.231551005 | 3.355645015 | 0.010610581 | 0.106682012 |
| 600 | ZFP3 | 1.230766904 | 3.169398854 | 0.016382139 | 0.147867797 |
| 601 | SPAG8 | 1.230655097 | 4.343613002 | 0.001443093 | 0.023062147 |
| 602 | EP300-AS1 | 1.230640844 | 4.52140165 | 0.001131144 | 0.01895477 |
| 603 | PPOX | 1.229715373 | 5.819296533 | 0.000693241 | 0.012840476 |
| 604 | ATG9B | 1.228636379 | 3.599081075 | 0.006429103 | 0.072732217 |
| 605 | ZMYND10 | 1.227744877 | 7.634094419 | 0.002962503 | 0.040192854 |
| 606 | FXYD2 | 1.225963481 | 3.642637269 | 0.006061903 | 0.069615591 |
| 607 | HACD4 | 1.22498988 | 4.332514761 | 0.001491484 | 0.023720628 |
| 608 | CETN2 | 1.224070448 | 8.598139038 | 0.005393161 | 0.063472074 |
| 609 | ADSSL1 | 1.223998341 | 4.668856734 | 0.001117457 | 0.018851358 |
| 610 | ENPP4 | 1.223060684 | 5.14768276 | 0.00074348 | 0.013637609 |
| 611 | C9orf9 | 1.221849296 | 5.934613586 | 0.000814481 | 0.014703276 |
| 612 | ROPN1B | 1.221129301 | 3.366594712 | 0.011304732 | 0.112029013 |
| 613 | FBXL2 | 1.219664419 | 3.467735654 | 0.008803168 | 0.092693745 |
| 614 | BZRAP1 | 1.218505818 | 3.39799479 | 0.010265525 | 0.104178613 |
| 615 | RBM43 | 1.217422506 | 3.252567091 | 0.014480603 | 0.136042402 |
| 616 | BBS4 | 1.215288255 | 4.443231485 | 0.001434697 | 0.022976336 |
| 617 | OSCP1 | 1.215154135 | 7.030631557 | 0.002172156 | 0.031648439 |
| 618 | ANKRD42 | 1.214158215 | 4.997361819 | 0.000841916 | 0.01514451 |
| 619 | SPAG16 | 1.213811021 | 6.157905529 | 0.001019565 | 0.01761917 |
| 620 | CYP27A1 | 1.212363699 | 4.861268882 | 0.000919195 | 0.016213685 |
| 621 | IQCE | 1.2102762 | 4.822920115 | 0.001004412 | 0.017487371 |
| 622 | C21orf58 | 1.208558818 | 4.366371269 | 0.001697532 | 0.026164389 |
| 623 | NBEA | 1.208348646 | 4.374245131 | 0.001629812 | 0.025482805 |
| 624 | CLUAP1 | 1.20543124 | 5.034942635 | 0.000955525 | 0.016712882 |
| 625 | CCDC69 | 1.204617874 | 6.071509695 | 0.001044256 | 0.017901627 |
| 626 | ARHGAP39 | 1.203414511 | 4.406287136 | 0.001680756 | 0.026011448 |
| 627 | UGT2A1 | 1.202457851 | 7.34464426 | 0.002626459 | 0.036784965 |
| 628 | CYP2A13 | 1.201701286 | 6.912427799 | 0.002736453 | 0.037975158 |
| 629 | CD200R1 | 1.199151706 | 5.952966369 | 0.001012683 | 0.01757092 |
| 630 | POLI | 1.198408448 | 2.820752677 | 0.047349314 | 0.309452126 |
| 631 | FAM46C | 1.19806711 | 4.313999074 | 0.001910444 | 0.028491514 |
| 632 | CD302 | 1.197791285 | 2.964606123 | 0.033017879 | 0.242866978 |
| 633 | CCDC160 | 1.197457479 | 3.732096364 | 0.005668606 | 0.066098912 |
| 634 | C12orf75 | 1.197127589 | 6.509559798 | 0.001751983 | 0.026732271 |
| 635 | WDR35 | 1.197033286 | 3.693321181 | 0.006192533 | 0.070794459 |
| 636 | CH17-340M24.3 | 1.195067942 | 5.536745459 | 0.001217065 | 0.020062417 |
| 637 | TRAF3IP1 | 1.194469649 | 5.735609024 | 0.000920577 | 0.016213685 |
| 638 | WDR66 | 1.193279015 | 6.057745943 | 0.001153228 | 0.019218784 |
| 639 | CABYR | 1.191613217 | 3.364829252 | 0.013655628 | 0.129655878 |
| 640 | ZNF440 | 1.190631623 | 4.858970041 | 0.00113501 | 0.018992391 |
| 641 | RHEBL1 | 1.188604571 | 2.889179101 | 0.041166047 | 0.281650712 |
| 642 | AQP7 | 1.187910091 | 2.938205611 | 0.036191185 | 0.258688596 |
| 643 | SNTB1 | 1.187195375 | 4.405351449 | 0.001940163 | 0.028793301 |
| 644 | LINC01279 | 1.186722268 | 3.447234462 | 0.011114064 | 0.110578899 |
| 645 | IQGAP2 | 1.18551631 | 4.488984801 | 0.00175006 | 0.02672979 |
| 646 | MAPRE3 | 1.185047449 | 5.804823689 | 0.00104392 | 0.017901627 |
| 647 | PLEKHG7 | 1.184887101 | 4.533920683 | 0.001616507 | 0.025300827 |
| 648 | DNAI2 | 1.184512679 | 5.59696109 | 0.001179612 | 0.019551168 |
| 649 | IFT74 | 1.182158286 | 4.826141219 | 0.001255923 | 0.020613434 |
| 650 | SPEF1 | 1.182026982 | 5.984725928 | 0.001513044 | 0.024003163 |
| 651 | LINC00094 | 1.181392281 | 4.122608592 | 0.003140616 | 0.041972564 |
| 652 | GRAMD1C | 1.17891782 | 3.909093861 | 0.004409204 | 0.054202868 |
| 653 | LOC257396 | 1.178416576 | 2.987097703 | 0.032851204 | 0.241875355 |
| 654 | NUDT4P1 | 1.177778733 | 4.366340569 | 0.002117434 | 0.030970016 |
| 655 | APOD | 1.177077477 | 6.788408032 | 0.002663954 | 0.037104724 |
| 656 | FAM179B | 1.176182371 | 3.741189841 | 0.006381652 | 0.072357163 |
| 657 | GYG2 | 1.175306341 | 2.990479266 | 0.032961266 | 0.242568074 |
| 658 | ATP6V0A4 | 1.174710932 | 5.057383941 | 0.001246166 | 0.020475429 |
| 659 | AGR3 | 1.172054561 | 6.937095645 | 0.003569345 | 0.046118972 |
| 660 | SLC22A16 | 1.171128684 | 3.464523797 | 0.015976682 | 0.145331324 |
| 661 | FAM134B | 1.170590228 | 3.264059389 | 0.018267139 | 0.161145669 |
| 662 | CCDC153 | 1.170250252 | 5.651258196 | 0.001799405 | 0.027293048 |
| 663 | DTX3 | 1.16872574 | 4.286242893 | 0.002619993 | 0.036762227 |
| 664 | SEPT5 | 1.167423862 | 4.536450291 | 0.002106765 | 0.030843691 |
| 665 | SAMD15 | 1.167234906 | 3.731514028 | 0.006969995 | 0.077352682 |
| 666 | TXNRD1 | 1.166877727 | 6.793044444 | 0.002279902 | 0.032696376 |
| 667 | RBKS | 1.166171537 | 4.784645489 | 0.001732637 | 0.026570594 |
| 668 | ADH7 | 1.165609511 | 8.220115824 | 0.004877741 | 0.058448193 |
| 669 | NME7 | 1.165422051 | 5.12432285 | 0.001347694 | 0.021859716 |
| 670 | MRVI1-AS1 | 1.163314549 | 2.974418661 | 0.036723563 | 0.261019254 |
| 671 | WBSCR27 | 1.162712498 | 5.074313987 | 0.001654699 | 0.025792242 |
| 672 | IFT22 | 1.160566064 | 5.975160864 | 0.001676145 | 0.025966562 |
| 673 | ABHD12B | 1.160541744 | 3.333747441 | 0.017233146 | 0.153600812 |
| 674 | PIBF1 | 1.160273119 | 4.418114774 | 0.002256125 | 0.032559396 |
| 675 | IDNK | 1.159676256 | 4.645641967 | 0.001784507 | 0.027119509 |
| 676 | PECR | 1.15836165 | 3.858658228 | 0.005731111 | 0.066623066 |
| 677 | CDK20 | 1.154627221 | 3.887280476 | 0.005567815 | 0.065224203 |
| 678 | WNT9A | 1.154212617 | 3.508491881 | 0.01193682 | 0.117297604 |
| 679 | FAM221A | 1.15418109 | 3.310864772 | 0.017776593 | 0.157642664 |
| 680 | WDR60 | 1.154035214 | 4.420175037 | 0.002477908 | 0.035125669 |
| 681 | C11orf74 | 1.150563147 | 5.85038217 | 0.001643339 | 0.025641486 |
| 682 | LOC401052 | 1.149254971 | 3.19598171 | 0.023018751 | 0.188903068 |
| 683 | RNASE4 | 1.148246728 | 6.066221781 | 0.001738367 | 0.026604733 |
| 684 | ARL13B | 1.145979939 | 3.255050274 | 0.020696876 | 0.175150485 |
| 685 | LINC01564 | 1.145814971 | 3.109676493 | 0.028340639 | 0.218804381 |
| 686 | CMAHP | 1.145370729 | 5.846997168 | 0.001860797 | 0.02797091 |
| 687 | FAM107B | 1.142562486 | 7.583366902 | 0.004696325 | 0.056843806 |
| 688 | TEKT4 | 1.142550753 | 4.029593277 | 0.005374487 | 0.06330137 |
| 689 | FAM183A | 1.142271282 | 7.392151968 | 0.00716169 | 0.078674946 |
| 690 | PTN | 1.141111112 | 6.089550153 | 0.00195503 | 0.028957325 |
| 691 | TCTEX1D2 | 1.140176434 | 6.552995496 | 0.003029361 | 0.040736717 |
| 692 | DRD2 | 1.139051254 | 3.161845352 | 0.025829073 | 0.204985356 |
| 693 | NUDT7 | 1.136663242 | 4.570306478 | 0.002391207 | 0.033991853 |
| 694 | KLHDC9 | 1.136387039 | 4.921932112 | 0.002025949 | 0.029862096 |
| 695 | ZC2HC1A | 1.136209805 | 3.189530622 | 0.024555756 | 0.197879772 |
| 696 | SPAG1 | 1.135500202 | 5.14505059 | 0.001674337 | 0.02596505 |
| 697 | MORN1 | 1.134533454 | 4.15141371 | 0.004488494 | 0.054866604 |
| 698 | ADTRP | 1.133167569 | 3.869435404 | 0.006568605 | 0.074073992 |
| 699 | OVGP1 | 1.129741019 | 3.000593568 | 0.038233282 | 0.269604126 |
| 700 | FMO5 | 1.128836379 | 3.679271679 | 0.00979815 | 0.100578445 |
| 701 | GATS | 1.122992272 | 5.021485808 | 0.001879629 | 0.028087126 |
| 702 | B9D1 | 1.122856387 | 6.512132472 | 0.003521697 | 0.0457026 |
| 703 | ATP6V1B1 | 1.120704998 | 3.871502895 | 0.007567719 | 0.081891032 |
| 704 | BTBD3 | 1.120278314 | 4.771531937 | 0.002278385 | 0.032696376 |
| 705 | TNFAIP8L3 | 1.118996318 | 3.025026105 | 0.037981699 | 0.268203792 |
| 706 | LYRM9 | 1.118751055 | 4.11027328 | 0.004940596 | 0.059003399 |
| 707 | ALDH3B1 | 1.11862751 | 7.756297521 | 0.006339527 | 0.072148949 |
| 708 | CCDC121 | 1.118384213 | 2.942197447 | 0.046436067 | 0.305085611 |
| 709 | SYT17 | 1.11811855 | 3.508597552 | 0.014357199 | 0.135050184 |
| 710 | ATP6V1C2 | 1.117736755 | 3.732155606 | 0.009380514 | 0.097411059 |
| 711 | PHTF1 | 1.116977565 | 4.46651851 | 0.003078658 | 0.041253475 |
| 712 | AK8 | 1.115313093 | 4.897203581 | 0.002850881 | 0.039133886 |
| 713 | GOLGA8B | 1.11470504 | 3.253227862 | 0.024550275 | 0.197879772 |
| 714 | ST3GAL5 | 1.114512009 | 3.412234273 | 0.018588694 | 0.162940847 |
| 715 | CCDC80 | 1.113094678 | 6.128713454 | 0.002325369 | 0.033211428 |
| 716 | CDNF | 1.112880769 | 3.202437675 | 0.027182733 | 0.211961092 |
| 717 | CYP2U1 | 1.112031143 | 2.972217148 | 0.044230475 | 0.295557692 |
| 718 | LOC102724163 | 1.108927511 | 3.012632623 | 0.040427581 | 0.278607143 |
| 719 | DENND6B | 1.108035219 | 5.210407679 | 0.002187387 | 0.031839803 |
| 720 | SLC27A2 | 1.107872266 | 6.856304101 | 0.004966205 | 0.05918126 |
| 721 | DIAPH2 | 1.106886534 | 3.184429728 | 0.028880218 | 0.221668084 |
| 722 | LOC339803 | 1.103844274 | 3.390951182 | 0.020118943 | 0.17208214 |
| 723 | C14orf142 | 1.103200016 | 6.171156897 | 0.003074298 | 0.041231436 |
| 724 | ZNF627 | 1.103113469 | 3.80491499 | 0.009107496 | 0.095358619 |
| 725 | LRRC71 | 1.103109664 | 4.654710208 | 0.003191299 | 0.042574961 |
| 726 | PLCB2 | 1.102394739 | 3.251515733 | 0.025263328 | 0.2017611 |
| 727 | IFT80 | 1.101454731 | 4.403343021 | 0.003739412 | 0.047747482 |
| 728 | BBS9 | 1.100737521 | 3.554105048 | 0.014592818 | 0.136680083 |
| 729 | PON3 | 1.100516283 | 3.477160577 | 0.01666077 | 0.149806075 |
| 730 | CFAP46 | 1.09969992 | 3.078560004 | 0.035966434 | 0.258126476 |
| 731 | ERICH2 | 1.098896365 | 4.966324332 | 0.002633721 | 0.036837334 |
| 732 | LOC388780 | 1.098831041 | 4.271520265 | 0.005712159 | 0.06645364 |
| 733 | SLC2A12 | 1.098770086 | 3.231996228 | 0.027400545 | 0.213221462 |
| 734 | PBLD | 1.097367088 | 3.440196306 | 0.018539587 | 0.162867073 |
| 735 | DLG3-AS1 | 1.095828903 | 3.004743991 | 0.044070192 | 0.294746105 |
| 736 | RIIAD1 | 1.095465736 | 5.900761191 | 0.003522068 | 0.0457026 |
| 737 | LOC100049716 | 1.095237119 | 3.617828948 | 0.013537131 | 0.128772382 |
| 738 | LRRC61 | 1.092599089 | 5.616432954 | 0.003383477 | 0.044512959 |
| 739 | APBB1 | 1.090960843 | 4.800045332 | 0.003216859 | 0.042878271 |
| 740 | ODF2L | 1.090109763 | 4.659048246 | 0.003255617 | 0.043280896 |
| 741 | AMY2B | 1.089244633 | 3.028430378 | 0.042105004 | 0.285884689 |
| 742 | LBHD1 | 1.087026859 | 3.307680365 | 0.025077854 | 0.201126247 |
| 743 | DLGAP1-AS1 | 1.086005038 | 3.552213447 | 0.016059761 | 0.145912203 |
| 744 | TMEM17 | 1.084999181 | 3.287410767 | 0.026425726 | 0.207765603 |
| 745 | PIP | 1.084372651 | 7.498180398 | 0.017004661 | 0.152309597 |
| 746 | BCAS3 | 1.083207122 | 4.649896156 | 0.003468836 | 0.045282777 |
| 747 | C20orf195 | 1.081980134 | 3.400069059 | 0.022777428 | 0.187734479 |
| 748 | WNT5B | 1.081915102 | 3.678853555 | 0.01314786 | 0.126256044 |
| 749 | UBE3D | 1.081490337 | 3.335755228 | 0.025064156 | 0.201122626 |
| 750 | NQO1 | 1.081082619 | 8.38623509 | 0.011118928 | 0.110578899 |
| 751 | PFN2 | 1.080631313 | 7.353243515 | 0.006357247 | 0.072212315 |
| 752 | IFT46 | 1.078354666 | 6.220604094 | 0.003818714 | 0.048596572 |
| 753 | CYP26A1 | 1.075293186 | 3.691913891 | 0.014166151 | 0.133805252 |
| 754 | HLA-DPA1 | 1.07419867 | 8.077429074 | 0.009432702 | 0.09781918 |
| 755 | ZCWPW1 | 1.073760074 | 3.64320421 | 0.014775357 | 0.137873062 |
| 756 | LOC100507564 | 1.073509422 | 3.128120105 | 0.037495 | 0.265260529 |
| 757 | MIA | 1.070255481 | 6.903949992 | 0.005336225 | 0.06299733 |
| 758 | CCDC96 | 1.06893394 | 5.598372986 | 0.003490379 | 0.045485777 |
| 759 | VNN3 | 1.06597468 | 4.643616794 | 0.003929583 | 0.049509488 |
| 760 | HAGHL | 1.065032174 | 4.729107818 | 0.003882424 | 0.049160099 |
| 761 | FGF14-AS2 | 1.064924835 | 3.24290558 | 0.032015904 | 0.237917503 |
| 762 | RIBC2 | 1.062455235 | 4.632320657 | 0.004809869 | 0.057817438 |
| 763 | CCDC74B | 1.062334211 | 5.019562988 | 0.003443386 | 0.045066792 |
| 764 | RSPH9 | 1.060741576 | 6.638484096 | 0.006474758 | 0.073194171 |
| 765 | DGCR6 | 1.060397141 | 5.532979491 | 0.00297303 | 0.040243733 |
| 766 | SORD | 1.059489503 | 7.109143214 | 0.007046588 | 0.077861204 |
| 767 | H3F3A | 1.059365758 | 4.429123118 | 0.005961224 | 0.068667151 |
| 768 | NUCB2 | 1.058866178 | 8.40376031 | 0.011894365 | 0.116956121 |
| 769 | AJAP1 | 1.058654045 | 3.217458817 | 0.034316097 | 0.249514843 |
| 770 | NAT14 | 1.056682887 | 5.629244413 | 0.004886732 | 0.058509747 |
| 771 | PLCB4 | 1.054953888 | 3.979758529 | 0.00962946 | 0.099114888 |
| 772 | IFI44L | 1.054402683 | 3.092657171 | 0.04330444 | 0.291407003 |
| 773 | WDPCP | 1.054010585 | 3.118396217 | 0.041029684 | 0.280990666 |
| 774 | SPATA13 | 1.052915755 | 4.276279542 | 0.006378362 | 0.072357163 |
| 775 | SVOPL | 1.05215727 | 3.803794952 | 0.012542441 | 0.121829394 |
| 776 | PAX7 | 1.05167351 | 4.179621709 | 0.007249832 | 0.079470718 |
| 777 | M1AP | 1.050710271 | 3.120415855 | 0.041881488 | 0.285132177 |
| 778 | VIPR1 | 1.049722033 | 4.222557647 | 0.00699334 | 0.077555063 |
| 779 | ENO2 | 1.049219432 | 3.725289086 | 0.014593493 | 0.136680083 |
| 780 | KIAA0895 | 1.047468177 | 3.151279547 | 0.039029499 | 0.272560193 |
| 781 | DYNC2LI1 | 1.046997854 | 5.632941165 | 0.003359663 | 0.044357268 |
| 782 | CDS1 | 1.045060861 | 5.829265673 | 0.003544875 | 0.045880896 |
| 783 | AK9 | 1.044544706 | 3.556923885 | 0.019606819 | 0.169419874 |
| 784 | GLIS3 | 1.042480527 | 3.719129469 | 0.015580148 | 0.143096074 |
| 785 | LYZ | 1.042139433 | 8.946978092 | 0.018906977 | 0.165061952 |
| 786 | DUSP18 | 1.04133406 | 4.234104159 | 0.007311678 | 0.079917848 |
| 787 | C3orf67 | 1.040734483 | 3.52048676 | 0.021433313 | 0.179580879 |
| 788 | GALM | 1.040659383 | 4.489726026 | 0.006304446 | 0.071911415 |
| 789 | SULT1A1 | 1.040088677 | 5.707574724 | 0.00354359 | 0.045880896 |
| 790 | PRRT3 | 1.039962586 | 4.613229668 | 0.005483155 | 0.06438149 |
| 791 | GBP3 | 1.039147194 | 5.912447444 | 0.00390098 | 0.04923082 |
| 792 | SPATA7 | 1.039120981 | 3.921652491 | 0.011283227 | 0.111888927 |
| 793 | NPIPA5 | 1.037747583 | 3.112360923 | 0.044627259 | 0.297443447 |
| 794 | C11orf52 | 1.037369831 | 5.55155284 | 0.005112261 | 0.060541608 |
| 795 | KDELR3 | 1.03672816 | 5.264035039 | 0.004119551 | 0.051560615 |
| 796 | PRSS12 | 1.036660458 | 4.845299543 | 0.00438578 | 0.054046193 |
| 797 | CCDC138 | 1.036078482 | 3.407861859 | 0.027115003 | 0.211541611 |
| 798 | KIF3B | 1.035501119 | 5.835088016 | 0.003897567 | 0.04923082 |
| 799 | IGFBP5 | 1.034372815 | 4.760297487 | 0.004678173 | 0.056683183 |
| 800 | SPATA24 | 1.03347307 | 3.58003065 | 0.021513813 | 0.180056623 |
| 801 | DDAH1 | 1.032665835 | 4.777274945 | 0.004629081 | 0.056267979 |
| 802 | UBXN11 | 1.032650169 | 6.215810258 | 0.004943507 | 0.059003399 |
| 803 | FAM65B | 1.030540462 | 3.737902142 | 0.017127233 | 0.152977514 |
| 804 | IQCB1 | 1.026508135 | 4.725516451 | 0.005021782 | 0.059628238 |
| 805 | C17orf82 | 1.025775127 | 3.284871007 | 0.036412942 | 0.259906572 |
| 806 | PLEKHS1 | 1.025476726 | 6.80638512 | 0.008865486 | 0.093081469 |
| 807 | C2orf15 | 1.020232777 | 3.170033069 | 0.043592701 | 0.292583728 |
| 808 | DMD | 1.019242961 | 3.229104582 | 0.039883015 | 0.276359623 |
| 809 | KIF9 | 1.019113276 | 4.25363949 | 0.008560709 | 0.090760253 |
| 810 | FAM188B | 1.018909663 | 4.030239732 | 0.011235504 | 0.111488516 |
| 811 | KATNAL2 | 1.018665228 | 3.514402382 | 0.024733658 | 0.198891099 |
| 812 | CROCC | 1.018016078 | 4.498667136 | 0.006427844 | 0.072732217 |
| 813 | CTXN1 | 1.016609431 | 6.601160857 | 0.009193571 | 0.095995041 |
| 814 | IQCK | 1.01534412 | 4.934665983 | 0.004898402 | 0.058603261 |
| 815 | C5orf45 | 1.012349252 | 4.184127813 | 0.009538641 | 0.09871551 |
| 816 | FCER1A | 1.011159498 | 4.109059066 | 0.010655451 | 0.106991441 |
| 817 | COLCA2 | 1.010982759 | 4.655404683 | 0.005814961 | 0.067494454 |
| 818 | FAM174A | 1.010816711 | 6.519209938 | 0.007120717 | 0.078338203 |
| 819 | KIF24 | 1.009738326 | 3.369743049 | 0.033155611 | 0.24337926 |
| 820 | NINJ2 | 1.009419103 | 3.293189602 | 0.038576401 | 0.271267679 |
| 821 | ZNF69 | 1.006290957 | 3.213979957 | 0.04342892 | 0.291871562 |
| 822 | CTSS | 1.005182028 | 6.94948926 | 0.009489401 | 0.098327514 |
| 823 | B3GNT6 | 1.004986302 | 4.105062062 | 0.012587187 | 0.122185853 |
| 824 | CRY2 | 1.004201786 | 4.895038181 | 0.005437194 | 0.06394073 |
| 825 | HIBADH | 1.004054169 | 5.806323226 | 0.005045432 | 0.059843557 |
| 826 | C22orf15 | 1.003048682 | 4.605003529 | 0.008192238 | 0.087280394 |
| 827 | TNFAIP8L1 | 1.003018611 | 6.140396945 | 0.007069661 | 0.078034723 |
| 828 | COQ10A | 1.002367049 | 4.191727695 | 0.009923372 | 0.101543165 |
| 829 | SMYD2 | 1.001951035 | 6.027488535 | 0.006241886 | 0.071251369 |
| 830 | BPIFB1 | 1.001854108 | 12.75790041 | 0.027436289 | 0.213390237 |
| 831 | SNX29 | 1.001471159 | 3.864618952 | 0.015748767 | 0.143987206 |
| 832 | NRAV | 1.001225661 | 5.145998252 | 0.005510936 | 0.064657672 |
| 833 | TMPO | -1.00034823 | 5.124265719 | 0.00476768 | 0.057446766 |
| 834 | NDC1 | -1.002157 | 4.208446335 | 0.008862956 | 0.093081469 |
| 835 | VCL | -1.003647862 | 5.681912157 | 0.005019289 | 0.059628238 |
| 836 | PKM | -1.004383197 | 10.69368768 | 0.025723966 | 0.20447186 |
| 837 | GPSM2 | -1.004386969 | 4.517959246 | 0.006312699 | 0.071951495 |
| 838 | ATAD2 | -1.004934839 | 3.454383639 | 0.026543012 | 0.208256338 |
| 839 | WNT4 | -1.005271547 | 3.365988953 | 0.031310257 | 0.23381816 |
| 840 | PFN1 | -1.006039926 | 9.907964656 | 0.026253952 | 0.206616752 |
| 841 | MYO19 | -1.006475821 | 4.142100826 | 0.009367816 | 0.097345775 |
| 842 | PPIF | -1.00765829 | 6.610580845 | 0.007422778 | 0.080609882 |
| 843 | GALK1 | -1.008765865 | 4.34718232 | 0.007527677 | 0.081574016 |
| 844 | HK2 | -1.009129814 | 5.407987282 | 0.004407525 | 0.054202868 |
| 845 | MTHFD1L | -1.009210348 | 4.416025366 | 0.006758515 | 0.075558005 |
| 846 | FASN | -1.011750732 | 5.50006296 | 0.004447352 | 0.054523169 |
| 847 | FMO2 | -1.011850868 | 5.107805601 | 0.004473112 | 0.054722628 |
| 848 | MRPL4 | -1.012050518 | 6.574750712 | 0.007336657 | 0.079995094 |
| 849 | CCNA1 | -1.012491671 | 3.867476311 | 0.012664612 | 0.122780419 |
| 850 | EIF5A | -1.013158368 | 9.363806124 | 0.022184713 | 0.18384733 |
| 851 | TPM4 | -1.013402009 | 8.495277167 | 0.015000627 | 0.138865563 |
| 852 | PMP22 | -1.01398026 | 3.094689722 | 0.04639369 | 0.305045043 |
| 853 | SPDL1 | -1.014089479 | 3.277697041 | 0.034353365 | 0.249666246 |
| 854 | JUNB | -1.015610399 | 7.359898879 | 0.010324422 | 0.104496917 |
| 855 | LOXL1 | -1.016148589 | 4.998305142 | 0.004375143 | 0.054002785 |
| 856 | TUBA1B | -1.017143497 | 9.39907635 | 0.025230742 | 0.2017611 |
| 857 | GIPC1 | -1.018116872 | 8.236104346 | 0.015222347 | 0.14048977 |
| 858 | BTBD11 | -1.018467734 | 3.530227212 | 0.02116811 | 0.178033736 |
| 859 | DNASE1L3 | -1.02009026 | 4.014643147 | 0.010405588 | 0.104911255 |
| 860 | CXCL5 | -1.020313073 | 3.214059778 | 0.036620853 | 0.260777573 |
| 861 | HES4 | -1.021514223 | 5.252430934 | 0.005602605 | 0.065530619 |
| 862 | FBXL19 | -1.02200222 | 4.28344589 | 0.006720181 | 0.075295785 |
| 863 | LAMB1 | -1.022078342 | 3.742360716 | 0.01493958 | 0.13873546 |
| 864 | EPHA2 | -1.022787145 | 6.087471871 | 0.004762946 | 0.057435307 |
| 865 | STARD5 | -1.023912757 | 4.201711701 | 0.007372145 | 0.080289747 |
| 866 | HBA1 | -1.025272746 | 3.088976931 | 0.042999245 | 0.290239272 |
| 867 | RAN | -1.025971703 | 7.484393845 | 0.011170296 | 0.110913954 |
| 868 | MYO5A | -1.032406055 | 3.146278621 | 0.03829262 | 0.269771953 |
| 869 | PGAM1 | -1.032737207 | 7.128676091 | 0.008753992 | 0.092357959 |
| 870 | ACOT7 | -1.03284467 | 6.04398305 | 0.004584668 | 0.055862304 |
| 871 | FUOM | -1.033164144 | 3.962337788 | 0.010241854 | 0.104007909 |
| 872 | LOC102467080 | -1.03357687 | 3.083289159 | 0.045054853 | 0.299363504 |
| 873 | NPM1 | -1.033973445 | 9.519871556 | 0.018561642 | 0.162891822 |
| 874 | SH3RF2 | -1.035585266 | 4.124608797 | 0.007814531 | 0.083963344 |
| 875 | CSE1L | -1.038720007 | 5.641917532 | 0.003755539 | 0.047872871 |
| 876 | FAM127A | -1.039699571 | 5.76765716 | 0.003359956 | 0.044357268 |
| 877 | SNRPA | -1.03972403 | 6.080110068 | 0.004717577 | 0.056978721 |
| 878 | FAM173A | -1.041046421 | 5.074178086 | 0.004449625 | 0.054523169 |
| 879 | DLK2 | -1.041236447 | 3.366384261 | 0.025604315 | 0.203734128 |
| 880 | TMEM43 | -1.042090307 | 5.296902299 | 0.003336039 | 0.044118238 |
| 881 | MTFR2 | -1.042922656 | 3.22906049 | 0.03276716 | 0.241536823 |
| 882 | FAT2 | -1.043565029 | 4.685515087 | 0.004814414 | 0.057826296 |
| 883 | TGFB1 | -1.043895446 | 4.700210125 | 0.003892843 | 0.04923082 |
| 884 | RPS2 | -1.044059335 | 11.54022357 | 0.023182096 | 0.189730768 |
| 885 | EIF6 | -1.045090262 | 8.737631655 | 0.015539168 | 0.14289258 |
| 886 | SMC4 | -1.045180658 | 4.259654189 | 0.005823884 | 0.067546372 |
| 887 | MYZAP | -1.047279145 | 3.654700005 | 0.014716602 | 0.137493813 |
| 888 | CHEK2 | -1.047362915 | 3.08273814 | 0.041828142 | 0.284896749 |
| 889 | KRT10 | -1.047512872 | 7.253633745 | 0.018291345 | 0.161265507 |
| 890 | UNC5B-AS1 | -1.04840915 | 5.338448234 | 0.003434334 | 0.044987109 |
| 891 | HLA-DQB1 | -1.04887971 | 7.175872178 | 0.013392525 | 0.127839444 |
| 892 | SNHG1 | -1.049612966 | 5.213686813 | 0.003463214 | 0.045248297 |
| 893 | ADIRF | -1.051447658 | 8.490807493 | 0.015736679 | 0.143987206 |
| 894 | FAM20A | -1.052682274 | 3.472727859 | 0.019249929 | 0.167383975 |
| 895 | MCM3 | -1.054251864 | 5.600489115 | 0.003102693 | 0.041502284 |
| 896 | TKT | -1.055816716 | 7.565880487 | 0.008948607 | 0.093759667 |
| 897 | MSN | -1.057351513 | 6.829638475 | 0.005614411 | 0.06561816 |
| 898 | TIMP1 | -1.057904928 | 8.614123633 | 0.01998038 | 0.171144867 |
| 899 | MMP28 | -1.058698141 | 4.870090794 | 0.003422323 | 0.044907267 |
| 900 | PPFIBP1 | -1.060727954 | 3.684583795 | 0.012754362 | 0.123218434 |
| 901 | TRIB3 | -1.062506135 | 3.002533104 | 0.045980609 | 0.303776158 |
| 902 | EHBP1L1 | -1.063720765 | 5.202413447 | 0.002762426 | 0.038292433 |
| 903 | BCAM | -1.064329811 | 6.437782548 | 0.004124371 | 0.05157842 |
| 904 | SLC26A4 | -1.064529459 | 5.136232436 | 0.00283435 | 0.039012786 |
| 905 | HACD2 | -1.064593909 | 4.384733102 | 0.004641893 | 0.056288518 |
| 906 | PARD6G | -1.064999929 | 3.279685539 | 0.025964622 | 0.205523928 |
| 907 | IMPDH2 | -1.068307078 | 7.446648597 | 0.008840944 | 0.092952361 |
| 908 | HPGD | -1.068335836 | 4.488499111 | 0.003955051 | 0.049789046 |
| 909 | PDZK1IP1 | -1.069880073 | 7.976609408 | 0.012272309 | 0.119973078 |
| 910 | CALML3 | -1.070268529 | 5.848690581 | 0.003875861 | 0.04911797 |
| 911 | TFAP2A | -1.070279572 | 4.39895482 | 0.004278674 | 0.053114329 |
| 912 | CTU1 | -1.070652367 | 3.003923969 | 0.044999235 | 0.299251168 |
| 913 | FUS | -1.071659572 | 6.244618907 | 0.003518135 | 0.0457026 |
| 914 | IFITM3 | -1.073410625 | 10.28593482 | 0.017509647 | 0.155456991 |
| 915 | NTS | -1.07655208 | 8.085073411 | 0.033388743 | 0.244410753 |
| 916 | MAP3K6 | -1.076878958 | 4.630455416 | 0.003233865 | 0.043067134 |
| 917 | KRT19 | -1.076974786 | 12.30621505 | 0.02353254 | 0.191874878 |
| 918 | C4orf48 | -1.07737385 | 5.58718221 | 0.003850683 | 0.04888049 |
| 919 | INCENP | -1.077969763 | 3.947410719 | 0.007338333 | 0.079995094 |
| 920 | CCDC51 | -1.079291251 | 4.99473194 | 0.002682016 | 0.037287876 |
| 921 | FAM189B | -1.079818297 | 4.204693151 | 0.00482618 | 0.057921789 |
| 922 | ARHGAP23 | -1.080846678 | 6.013844405 | 0.002941503 | 0.040048465 |
| 923 | RNASEH2A | -1.082539306 | 5.543118865 | 0.003370471 | 0.044418829 |
| 924 | PPIA | -1.082582891 | 9.269649439 | 0.014607599 | 0.136727851 |
| 925 | RIN1 | -1.083126468 | 4.058704558 | 0.005993722 | 0.068936886 |
| 926 | KNSTRN | -1.084850367 | 3.963655707 | 0.007081114 | 0.078072243 |
| 927 | SNHG15 | -1.086026935 | 4.486998156 | 0.003433085 | 0.044987109 |
| 928 | AGAP2-AS1 | -1.087714752 | 3.763435892 | 0.009576103 | 0.09876657 |
| 929 | SLC6A8 | -1.089149987 | 6.460338926 | 0.003616959 | 0.046575637 |
| 930 | ALDH4A1 | -1.09011912 | 4.470595638 | 0.003388505 | 0.044540509 |
| 931 | ZNF503 | -1.090422161 | 3.295470601 | 0.022243181 | 0.18413085 |
| 932 | NOTCH1 | -1.093041592 | 4.265460293 | 0.004166236 | 0.051930871 |
| 933 | UBE2T | -1.093731125 | 4.795867022 | 0.002927124 | 0.039891918 |
| 934 | ACTG1 | -1.09640194 | 11.76340517 | 0.016563286 | 0.149148163 |
| 935 | DPYSL3 | -1.098113848 | 3.667445552 | 0.011159098 | 0.110875277 |
| 936 | MARVELD1 | -1.10045465 | 3.913440671 | 0.006491936 | 0.073333758 |
| 937 | CHAF1A | -1.100534464 | 4.194961904 | 0.004215122 | 0.052497114 |
| 938 | GPR153 | -1.100948349 | 4.569660946 | 0.00286889 | 0.039310003 |
| 939 | VNN1 | -1.105945272 | 3.182533522 | 0.02525465 | 0.2017611 |
| 940 | KIF22 | -1.107443066 | 5.354520489 | 0.0020983 | 0.030749406 |
| 941 | ADM | -1.108101859 | 4.660884094 | 0.002279607 | 0.032696376 |
| 942 | TIMM13 | -1.109319458 | 5.988531462 | 0.002720564 | 0.037789207 |
| 943 | EPHB3 | -1.109713598 | 4.5763479 | 0.0025152 | 0.035554712 |
| 944 | PTMS | -1.115356451 | 8.162641199 | 0.008117858 | 0.086548683 |
| 945 | DUS3L | -1.115702456 | 4.357132771 | 0.002983016 | 0.040291952 |
| 946 | EPHB2 | -1.117054432 | 3.110229137 | 0.028178669 | 0.217825128 |
| 947 | GLTP | -1.117189729 | 7.722089591 | 0.005998354 | 0.068937928 |
| 948 | TPI1 | -1.1174066 | 10.00932378 | 0.013284001 | 0.127001073 |
| 949 | FANCD2 | -1.11979361 | 2.977155032 | 0.038039087 | 0.268484154 |
| 950 | BMP7 | -1.119941978 | 4.352620271 | 0.00309712 | 0.041464268 |
| 951 | MCM4 | -1.120843062 | 5.141030478 | 0.001667512 | 0.025888469 |
| 952 | SNAI2 | -1.121654612 | 3.954736984 | 0.005286862 | 0.062489835 |
| 953 | PRODH | -1.121934214 | 6.838374721 | 0.003328761 | 0.044060378 |
| 954 | RBBP8NL | -1.124024065 | 3.145767046 | 0.025507605 | 0.203284549 |
| 955 | GPC1 | -1.124416341 | 6.435558107 | 0.002654379 | 0.037005311 |
| 956 | MUCL1 | -1.124568747 | 6.108718395 | 0.002892129 | 0.0395927 |
| 957 | SERPINH1 | -1.125345363 | 5.25891828 | 0.001568157 | 0.024719126 |
| 958 | TMEM132A | -1.125904241 | 5.019313642 | 0.001725248 | 0.026510848 |
| 959 | GRK5 | -1.126400196 | 2.909761408 | 0.043969746 | 0.294392582 |
| 960 | MYH9 | -1.133902616 | 7.380749489 | 0.004318437 | 0.053519935 |
| 961 | NGFR | -1.134706125 | 4.124239523 | 0.003642496 | 0.046825045 |
| 962 | AHCY | -1.13521255 | 7.001470829 | 0.004136098 | 0.051597565 |
| 963 | FAM129B | -1.135507173 | 8.635366811 | 0.007104069 | 0.07821173 |
| 964 | PLSCR3 | -1.135944886 | 4.65586645 | 0.00183423 | 0.027736332 |
| 965 | PDSS1 | -1.137533661 | 3.240611314 | 0.019845164 | 0.170605485 |
| 966 | POLD1 | -1.138743733 | 3.643704809 | 0.008639066 | 0.091335867 |
| 967 | ZNF296 | -1.14056004 | 3.986888528 | 0.004437784 | 0.054465991 |
| 968 | IGSF9 | -1.150129271 | 4.192640064 | 0.002901413 | 0.039648296 |
| 969 | C20orf27 | -1.150956955 | 5.346282882 | 0.001525222 | 0.024145901 |
| 970 | IGFBP3 | -1.154339798 | 7.667632522 | 0.004461031 | 0.054618854 |
| 971 | NAPRT | -1.154385682 | 6.486628338 | 0.003018876 | 0.040631722 |
| 972 | TNFRSF12A | -1.15926384 | 5.941844315 | 0.001814423 | 0.027491589 |
| 973 | SEC14L2 | -1.159503341 | 4.091520547 | 0.003542606 | 0.045880896 |
| 974 | GPRC5A | -1.16056778 | 6.757431379 | 0.002308603 | 0.033003018 |
| 975 | FEN1 | -1.163744845 | 5.167760109 | 0.00130528 | 0.021239836 |
| 976 | PLXDC2 | -1.165228378 | 2.962627341 | 0.03178982 | 0.236584827 |
| 977 | TAGLN | -1.167773313 | 4.869439636 | 0.001730278 | 0.026561251 |
| 978 | NME1 | -1.16890922 | 7.693639374 | 0.005358949 | 0.063170035 |
| 979 | HSPG2 | -1.169088141 | 4.679198351 | 0.001413808 | 0.022713682 |
| 980 | LINC01503 | -1.170719123 | 4.288545753 | 0.002149244 | 0.031388109 |
| 981 | SMOX | -1.17184485 | 4.109652293 | 0.002833613 | 0.039012786 |
| 982 | PINX1 | -1.1725647 | 3.956514736 | 0.003702971 | 0.047441773 |
| 983 | CD320 | -1.173871575 | 4.36000488 | 0.002197154 | 0.031873471 |
| 984 | CLTB | -1.176347547 | 8.228828708 | 0.005023351 | 0.059628238 |
| 985 | SGOL2 | -1.178006864 | 2.822905742 | 0.046273225 | 0.304779356 |
| 986 | RTKN | -1.179121017 | 4.075022772 | 0.002792042 | 0.038607797 |
| 987 | SERPINB9 | -1.180341374 | 2.928386834 | 0.033169355 | 0.24337926 |
| 988 | EHD1 | -1.182308712 | 5.653769151 | 0.00109065 | 0.018480186 |
| 989 | SDC1 | -1.182366244 | 8.956900728 | 0.005531475 | 0.064848533 |
| 990 | CKS1B | -1.182627247 | 6.014907936 | 0.001547707 | 0.024450868 |
| 991 | SPNS2 | -1.184863423 | 5.059659871 | 0.000927294 | 0.01631307 |
| 992 | ADGRL2 | -1.186590649 | 3.918158012 | 0.003596583 | 0.046422844 |
| 993 | HIST1H2BK | -1.187520409 | 6.731875177 | 0.002250694 | 0.032511926 |
| 994 | MAP7D1 | -1.189658586 | 6.065429814 | 0.001044749 | 0.017901627 |
| 995 | RAET1G | -1.191862962 | 5.176746578 | 0.001020106 | 0.01761917 |
| 996 | TUBA1C | -1.193202263 | 8.816676408 | 0.005586457 | 0.065392127 |
| 997 | TM4SF1 | -1.197601708 | 7.806014798 | 0.003608044 | 0.046500271 |
| 998 | FAM83B | -1.198769108 | 3.87384792 | 0.003449371 | 0.045106245 |
| 999 | SAMD9 | -1.202484704 | 4.866065403 | 0.000850318 | 0.015259482 |
| 1000 | RANGAP1 | -1.203921463 | 5.950813471 | 0.000967497 | 0.016902812 |
| 1001 | IER5L | -1.207431717 | 4.107516085 | 0.002293544 | 0.03283954 |
| 1002 | ITGB4 | -1.207631051 | 6.813427132 | 0.001642452 | 0.025641486 |
| 1003 | DST | -1.20884605 | 4.519733541 | 0.001144014 | 0.019107175 |
| 1004 | ZNF385A | -1.208964202 | 6.165713745 | 0.00094821 | 0.016604059 |
| 1005 | CKAP2 | -1.2103836 | 4.058733133 | 0.002263873 | 0.032578315 |
| 1006 | HOPX | -1.210996978 | 5.854541214 | 0.001131098 | 0.01895477 |
| 1007 | SCD | -1.212022423 | 5.667173629 | 0.0009166 | 0.016200032 |
| 1008 | GINS3 | -1.213919006 | 3.507550672 | 0.007094703 | 0.078165296 |
| 1009 | MFI2 | -1.218890837 | 3.150140037 | 0.015925591 | 0.145100324 |
| 1010 | FAT1 | -1.219557564 | 5.16349366 | 0.000694377 | 0.012840476 |
| 1011 | PRDM1 | -1.22007428 | 3.318657694 | 0.01055951 | 0.106238883 |
| 1012 | TXNDC17 | -1.220737365 | 5.935774414 | 0.000920011 | 0.016213685 |
| 1013 | EPHA1 | -1.222934211 | 4.627022144 | 0.000863034 | 0.015451163 |
| 1014 | TMEM40 | -1.22359027 | 5.125835614 | 0.000701141 | 0.012949783 |
| 1015 | FAM83G | -1.22412006 | 4.202360163 | 0.001574159 | 0.024765682 |
| 1016 | BOK | -1.22630249 | 4.421697748 | 0.001125152 | 0.018896077 |
| 1017 | CASC9 | -1.229385802 | 2.935332743 | 0.026968395 | 0.211048546 |
| 1018 | KRT80 | -1.232281433 | 5.314162584 | 0.00054556 | 0.010933415 |
| 1019 | LGALSL | -1.23384794 | 3.922718414 | 0.002425546 | 0.034447739 |
| 1020 | EFNA3 | -1.235513852 | 3.997309184 | 0.002067246 | 0.030382306 |
| 1021 | EZH2 | -1.235555442 | 3.876667193 | 0.002635051 | 0.036837334 |
| 1022 | ORC6 | -1.235932984 | 2.890573969 | 0.029963592 | 0.227795322 |
| 1023 | TRAIP | -1.238178015 | 2.892002503 | 0.030051157 | 0.22790305 |
| 1024 | VAV2 | -1.239024819 | 3.609150998 | 0.004698918 | 0.056843806 |
| 1025 | LINC01559 | -1.240744255 | 3.979005925 | 0.002060757 | 0.030316286 |
| 1026 | TTLL12 | -1.241135267 | 6.102200693 | 0.000685703 | 0.01274215 |
| 1027 | DFNA5 | -1.245130913 | 3.899920955 | 0.002360884 | 0.033623773 |
| 1028 | MICALL1 | -1.245773402 | 5.454812329 | 0.000493678 | 0.010042029 |
| 1029 | MZT2A | -1.247188636 | 6.825230502 | 0.001829162 | 0.027687278 |
| 1030 | IFITM2 | -1.248445587 | 7.917467369 | 0.004327684 | 0.053547594 |
| 1031 | TNS4 | -1.24864311 | 5.878809392 | 0.000804909 | 0.014582189 |
| 1032 | PHLDA1 | -1.249435664 | 4.247716147 | 0.001177417 | 0.019536122 |
| 1033 | NCAPD2 | -1.249569226 | 4.732068837 | 0.000631279 | 0.011995092 |
| 1034 | PLCD3 | -1.250831729 | 4.897201818 | 0.000556396 | 0.011051244 |
| 1035 | AIF1L | -1.253465967 | 3.691328311 | 0.003557623 | 0.046006671 |
| 1036 | ITPRIP | -1.254248816 | 4.043756259 | 0.00165922 | 0.025836181 |
| 1037 | FAM20C | -1.259683221 | 3.397308369 | 0.006959072 | 0.077344537 |
| 1038 | PDLIM7 | -1.259732695 | 4.916028294 | 0.000501186 | 0.010145343 |
| 1039 | ECT2 | -1.259782539 | 4.118619543 | 0.001342374 | 0.021796714 |
| 1040 | CHTF18 | -1.259995276 | 3.427640848 | 0.006572103 | 0.074073992 |
| 1041 | E2F1 | -1.260937548 | 3.195143718 | 0.011532659 | 0.114064383 |
| 1042 | SH3BGRL3 | -1.261934393 | 8.757909747 | 0.004007422 | 0.050323138 |
| 1043 | OSMR | -1.264617394 | 4.653900354 | 0.000554965 | 0.011051244 |
| 1044 | POC1A | -1.266091231 | 3.873593279 | 0.002261283 | 0.032571918 |
| 1045 | PITX1 | -1.266832618 | 6.77951901 | 0.000912687 | 0.016149663 |
| 1046 | PHLDA3 | -1.268526288 | 5.985076323 | 0.000548459 | 0.010956187 |
| 1047 | NCAPG2 | -1.270813197 | 3.686774454 | 0.0032744 | 0.043390269 |
| 1048 | DDX11 | -1.270857101 | 3.32050339 | 0.007986463 | 0.085387668 |
| 1049 | SH3GL1 | -1.271347454 | 6.661814033 | 0.000796038 | 0.014456273 |
| 1050 | GSDMC | -1.271736131 | 3.880717364 | 0.001933908 | 0.028784889 |
| 1051 | CTPS1 | -1.271755018 | 4.534599697 | 0.000639131 | 0.012098852 |
| 1052 | SP6 | -1.273223196 | 2.83153318 | 0.030353303 | 0.229493946 |
| 1053 | PPP1R13L | -1.273977137 | 5.704646783 | 0.000368608 | 0.007926648 |
| 1054 | ZYX | -1.274708517 | 7.339824068 | 0.00132885 | 0.021600211 |
| 1055 | PPARG | -1.27659269 | 3.741718128 | 0.002862646 | 0.03925988 |
| 1056 | LPAR5 | -1.276793272 | 3.516930555 | 0.004599813 | 0.056001891 |
| 1057 | NOP16 | -1.277986778 | 5.463656115 | 0.000360976 | 0.007780748 |
| 1058 | ETHE1 | -1.278916401 | 7.004694462 | 0.001224112 | 0.020134859 |
| 1059 | IER5 | -1.279359301 | 5.51535207 | 0.000345262 | 0.00751113 |
| 1060 | FABP5 | -1.279475476 | 9.660788307 | 0.00567548 | 0.066128275 |
| 1061 | CENPH | -1.281817638 | 4.247564244 | 0.001057465 | 0.018038686 |
| 1062 | SERPINA3 | -1.281817765 | 7.536409564 | 0.002610009 | 0.036656025 |
| 1063 | FANCG | -1.286880524 | 3.50586549 | 0.004573356 | 0.055769225 |
| 1064 | RRM1 | -1.288928367 | 5.975588914 | 0.000419299 | 0.008785776 |
| 1065 | CDC42EP1 | -1.289065447 | 6.022193974 | 0.00042144 | 0.008813083 |
| 1066 | TOMM40 | -1.290693679 | 6.424803932 | 0.000624623 | 0.011943351 |
| 1067 | DKK1 | -1.290739834 | 3.652524912 | 0.002996532 | 0.040402616 |
| 1068 | ATP5D | -1.291352941 | 8.11782392 | 0.003046077 | 0.040925255 |
| 1069 | TCF19 | -1.291816102 | 3.843308912 | 0.001988683 | 0.029369832 |
| 1070 | CELSR2 | -1.294920794 | 3.846843281 | 0.001856029 | 0.027926886 |
| 1071 | SGK223 | -1.297404149 | 3.380319236 | 0.005776758 | 0.067102326 |
| 1072 | GLS | -1.298961601 | 4.017110368 | 0.001185717 | 0.019630921 |
| 1073 | C12orf54 | -1.30321808 | 3.31272686 | 0.006675749 | 0.075019411 |
| 1074 | RAB38 | -1.30513097 | 5.811476175 | 0.000283268 | 0.006380685 |
| 1075 | MTNR1A | -1.306144748 | 3.760319035 | 0.001982805 | 0.029311533 |
| 1076 | NRARP | -1.306383152 | 4.479816584 | 0.000469268 | 0.00964063 |
| 1077 | FERMT1 | -1.307577822 | 3.994305877 | 0.001152075 | 0.019218784 |
| 1078 | GAS5 | -1.314295978 | 7.364759075 | 0.001168219 | 0.019419496 |
| 1079 | EGFL6 | -1.316382231 | 3.023162386 | 0.014264678 | 0.134513253 |
| 1080 | HP | -1.318885787 | 3.735067331 | 0.002225731 | 0.032212627 |
| 1081 | CDK6 | -1.319118572 | 3.681670809 | 0.002244314 | 0.032450637 |
| 1082 | PLCB3 | -1.319154915 | 3.998912425 | 0.001061521 | 0.018047049 |
| 1083 | NUDT1 | -1.320021787 | 5.998799764 | 0.000490964 | 0.01001857 |
| 1084 | HN1 | -1.321796238 | 7.552211615 | 0.001777513 | 0.027040287 |
| 1085 | TYRO3 | -1.322155544 | 3.294459322 | 0.006346904 | 0.072178797 |
| 1086 | CSF2RB | -1.322238379 | 2.988970664 | 0.014739801 | 0.137625869 |
| 1087 | ABCA12 | -1.32250895 | 3.308537761 | 0.006141372 | 0.070315472 |
| 1088 | NTRK2 | -1.322724129 | 2.81120657 | 0.026967505 | 0.211048546 |
| 1089 | FAM126A | -1.327641437 | 3.15742072 | 0.008363154 | 0.088851925 |
| 1090 | H2AFZ | -1.329637349 | 8.829763557 | 0.00233951 | 0.033350648 |
| 1091 | EMP3 | -1.329767924 | 5.174481739 | 0.000255258 | 0.005880618 |
| 1092 | RPS6KA4 | -1.340408428 | 5.759050289 | 0.000190859 | 0.00464363 |
| 1093 | ZNF185 | -1.341284069 | 6.782300431 | 0.000484407 | 0.009900808 |
| 1094 | CALD1 | -1.342060461 | 3.569673876 | 0.002530146 | 0.035699513 |
| 1095 | LRRC8A | -1.34388283 | 6.523135853 | 0.000361149 | 0.007780748 |
| 1096 | EPPK1 | -1.344642648 | 3.659887947 | 0.002009589 | 0.029649735 |
| 1097 | HIST1H2BG | -1.345067776 | 3.24419498 | 0.00632437 | 0.072030447 |
| 1098 | STMN3 | -1.352563521 | 3.702596988 | 0.001700903 | 0.026189768 |
| 1099 | NETO2 | -1.354417932 | 3.086204098 | 0.009224842 | 0.096189255 |
| 1100 | SLC35F2 | -1.355956228 | 3.760604771 | 0.001401966 | 0.022571211 |
| 1101 | MMP9 | -1.356467074 | 4.888320149 | 0.000608121 | 0.011761137 |
| 1102 | ECHDC3 | -1.359185318 | 4.070326438 | 0.001044474 | 0.017901627 |
| 1103 | LMNA | -1.359459726 | 8.402491529 | 0.001265065 | 0.020696357 |
| 1104 | DSP | -1.360505798 | 7.486461633 | 0.000849925 | 0.015259482 |
| 1105 | RECQL4 | -1.360582406 | 2.841805342 | 0.02108164 | 0.177516063 |
| 1106 | PVR | -1.361092524 | 3.35616623 | 0.004226678 | 0.052597895 |
| 1107 | MCM2 | -1.361708709 | 4.578134567 | 0.000276431 | 0.006273211 |
| 1108 | S100A12 | -1.36440259 | 4.365994422 | 0.000345328 | 0.00751113 |
| 1109 | ARHGAP10 | -1.364724984 | 2.937797425 | 0.014496124 | 0.136103996 |
| 1110 | C1orf233 | -1.365260869 | 3.640946388 | 0.001872271 | 0.028087126 |
| 1111 | CD93 | -1.366285239 | 2.666989707 | 0.03644871 | 0.260039619 |
| 1112 | F12 | -1.366650408 | 2.905285448 | 0.016665951 | 0.149806075 |
| 1113 | MDFI | -1.372819668 | 5.62953245 | 0.000133042 | 0.003518494 |
| 1114 | LRR1 | -1.37335704 | 4.283988704 | 0.000390519 | 0.00830372 |
| 1115 | RPTN | -1.377350023 | 4.327802348 | 0.000326633 | 0.007166095 |
| 1116 | RARG | -1.377415832 | 5.878617112 | 0.000160413 | 0.00404551 |
| 1117 | CENPU | -1.379464879 | 3.939860917 | 0.000778795 | 0.014169553 |
| 1118 | CCL22 | -1.379495459 | 2.702255804 | 0.031307205 | 0.23381816 |
| 1119 | SOCS2 | -1.379572861 | 3.149899006 | 0.006735678 | 0.075413768 |
| 1120 | PNP | -1.382259415 | 5.43812011 | 0.000126613 | 0.003384136 |
| 1121 | NSG1 | -1.387218966 | 3.852260496 | 0.000896624 | 0.015939746 |
| 1122 | CD44 | -1.387582594 | 7.604166448 | 0.000594787 | 0.011576992 |
| 1123 | PPL | -1.387912234 | 7.364203016 | 0.000545879 | 0.010933415 |
| 1124 | C16orf74 | -1.388021907 | 4.528954321 | 0.000232887 | 0.005481682 |
| 1125 | KIF20B | -1.388609953 | 2.81679508 | 0.020604262 | 0.1746588 |
| 1126 | PRRX2 | -1.388877229 | 3.655267082 | 0.001440968 | 0.023052453 |
| 1127 | SHMT2 | -1.390648894 | 5.904659087 | 0.000153058 | 0.003933301 |
| 1128 | SUSD2 | -1.391769989 | 2.622532823 | 0.038827146 | 0.271884041 |
| 1129 | SH3BP1 | -1.393387184 | 5.06133377 | 0.000111065 | 0.003093097 |
| 1130 | JUP | -1.394980226 | 8.932452213 | 0.001117522 | 0.018851358 |
| 1131 | B3GNT8 | -1.395041168 | 3.12518387 | 0.00672011 | 0.075295785 |
| 1132 | CALML5 | -1.395526818 | 5.879325252 | 0.000120445 | 0.003259538 |
| 1133 | NT5DC2 | -1.397670236 | 5.777116075 | 0.000118878 | 0.003228638 |
| 1134 | SLC9A3 | -1.397998577 | 5.253809671 | 0.000202937 | 0.004851957 |
| 1135 | MROH6 | -1.402849158 | 3.798594199 | 0.000987208 | 0.017227345 |
| 1136 | CDCA4 | -1.403473861 | 4.190160478 | 0.000355216 | 0.007693127 |
| 1137 | TRIM47 | -1.405682701 | 4.96909483 | 0.000126475 | 0.003384136 |
| 1138 | WDR76 | -1.409899574 | 2.792698045 | 0.02063742 | 0.174842253 |
| 1139 | HAPLN3 | -1.410356547 | 4.442021872 | 0.000207356 | 0.004934297 |
| 1140 | FANCI | -1.410377783 | 3.871348177 | 0.000731195 | 0.013455763 |
| 1141 | PLAU | -1.410922848 | 5.306119897 | 0.000107069 | 0.003015821 |
| 1142 | MAD2L1 | -1.412726343 | 4.536145702 | 0.000174856 | 0.004344794 |
| 1143 | WNT10A | -1.415204599 | 2.939729287 | 0.011323767 | 0.112144441 |
| 1144 | SVIL | -1.421365862 | 4.029472881 | 0.000406819 | 0.008562789 |
| 1145 | FBLN1 | -1.423059532 | 5.813695775 | 8.99E-05 | 0.002605085 |
| 1146 | LTBP2 | -1.42326345 | 2.785672118 | 0.019706293 | 0.169892636 |
| 1147 | IL19 | -1.424622737 | 5.59143768 | 7.93E-05 | 0.002337827 |
| 1148 | PLS3 | -1.425267727 | 6.451019646 | 0.000153114 | 0.003933301 |
| 1149 | PI3 | -1.428332475 | 11.9194398 | 0.003505813 | 0.045608616 |
| 1150 | PGM2 | -1.428711289 | 4.987216027 | 8.03E-05 | 0.002350311 |
| 1151 | ITGA5 | -1.429754028 | 3.362377883 | 0.00268151 | 0.037287876 |
| 1152 | SPINK5 | -1.43028313 | 5.863608359 | 0.000179219 | 0.004417042 |
| 1153 | FRMD6 | -1.430398712 | 4.034769207 | 0.000386104 | 0.008221358 |
| 1154 | DNLZ | -1.431889401 | 4.979882193 | 0.000159411 | 0.004033617 |
| 1155 | RMI2 | -1.433654915 | 3.808198466 | 0.000809283 | 0.014626822 |
| 1156 | CKMT1A | -1.434599618 | 4.641413558 | 0.000133712 | 0.003518494 |
| 1157 | SRM | -1.436713705 | 6.370512811 | 0.000133835 | 0.003518494 |
| 1158 | FJX1 | -1.436715841 | 2.649619661 | 0.030597728 | 0.230577488 |
| 1159 | ARNTL2 | -1.440636101 | 4.130708427 | 0.000272093 | 0.006193271 |
| 1160 | RHOD | -1.442867118 | 6.561267688 | 0.000172987 | 0.004305397 |
| 1161 | GCNT3 | -1.443704487 | 6.017674799 | 0.000193391 | 0.004682725 |
| 1162 | COL1A1 | -1.444201154 | 4.127748157 | 0.000249907 | 0.005801364 |
| 1163 | LAMA3 | -1.446266471 | 5.263778756 | 7.61E-05 | 0.00226197 |
| 1164 | SLC27A4 | -1.447268338 | 5.216696083 | 6.34E-05 | 0.001937078 |
| 1165 | CYB5R2 | -1.448290803 | 5.647964083 | 8.23E-05 | 0.002402655 |
| 1166 | MMP1 | -1.450393805 | 5.719991028 | 0.000417123 | 0.008759 |
| 1167 | SOCS1 | -1.453134451 | 3.224825009 | 0.00368028 | 0.047190887 |
| 1168 | ENO1 | -1.457826389 | 10.14216328 | 0.00115671 | 0.019255667 |
| 1169 | S100A16 | -1.461354084 | 9.920786257 | 0.001019287 | 0.01761917 |
| 1170 | VGLL1 | -1.461908349 | 4.997569657 | 8.03E-05 | 0.002350311 |
| 1171 | MMRN2 | -1.461997881 | 2.528264343 | 0.041946193 | 0.285210244 |
| 1172 | POSTN | -1.466439319 | 5.300671661 | 5.22E-05 | 0.001665482 |
| 1173 | CLCA2 | -1.471451475 | 6.902571678 | 0.000161841 | 0.004074735 |
| 1174 | GAPDH | -1.473361965 | 12.10790994 | 0.001843062 | 0.027814482 |
| 1175 | S100A10 | -1.475410321 | 9.154327363 | 0.000901256 | 0.015984663 |
| 1176 | MALL | -1.478597759 | 4.306515071 | 0.000126833 | 0.003384136 |
| 1177 | FOXE1 | -1.479846961 | 2.747544681 | 0.018985362 | 0.165367618 |
| 1178 | PLP2 | -1.480847259 | 8.523891197 | 0.000528411 | 0.010639697 |
| 1179 | CSTB | -1.48112597 | 10.87304872 | 0.001518496 | 0.024064523 |
| 1180 | PVRL1 | -1.4831371 | 6.751985287 | 0.000144135 | 0.0037599 |
| 1181 | GINS4 | -1.483328893 | 2.62970603 | 0.028172152 | 0.217825128 |
| 1182 | ACAA2 | -1.484335505 | 3.5712833 | 0.000946683 | 0.016596465 |
| 1183 | LY6K | -1.484871513 | 2.560183708 | 0.034779314 | 0.251797589 |
| 1184 | TUBB | -1.486796165 | 8.501926521 | 0.000601146 | 0.011641078 |
| 1185 | FAM83A | -1.487394261 | 5.200218336 | 4.03E-05 | 0.001338547 |
| 1186 | C2orf54 | -1.488782838 | 5.240856081 | 5.35E-05 | 0.001699138 |
| 1187 | TMSB15B | -1.48953374 | 2.495628504 | 0.043584316 | 0.292583728 |
| 1188 | AQP1 | -1.489848533 | 3.754598504 | 0.000658632 | 0.012314476 |
| 1189 | ADGRG6 | -1.491412306 | 2.542781729 | 0.036711421 | 0.261019254 |
| 1190 | PPP1R14B | -1.49366842 | 7.457693687 | 0.000258261 | 0.005931794 |
| 1191 | ULBP2 | -1.49557568 | 3.665798336 | 0.000673267 | 0.012541774 |
| 1192 | PGF | -1.495802523 | 2.561132497 | 0.034764263 | 0.251797589 |
| 1193 | CXCL14 | -1.498418335 | 4.486080526 | 7.56E-05 | 0.002250597 |
| 1194 | BMP1 | -1.498682226 | 4.290185589 | 0.000108435 | 0.003043006 |
| 1195 | ENG | -1.498701052 | 4.073530735 | 0.00019724 | 0.00476073 |
| 1196 | TNC | -1.500895646 | 5.837275736 | 3.42E-05 | 0.001169925 |
| 1197 | RGMA | -1.501552392 | 2.966149875 | 0.006969308 | 0.077352682 |
| 1198 | C9orf40 | -1.502944303 | 3.007102441 | 0.005975824 | 0.068783143 |
| 1199 | S1PR5 | -1.503972808 | 3.421501749 | 0.001434259 | 0.022976336 |
| 1200 | PIEZO1 | -1.505719815 | 4.28160165 | 9.66E-05 | 0.002762674 |
| 1201 | BNC1 | -1.506466222 | 3.531555158 | 0.000883273 | 0.015739262 |
| 1202 | CAPNS2 | -1.51011582 | 4.1355939 | 0.000153719 | 0.003942173 |
| 1203 | CBLC | -1.510454173 | 5.457215785 | 3.44E-05 | 0.001173991 |
| 1204 | MYC | -1.510981144 | 4.971804456 | 3.69E-05 | 0.001241895 |
| 1205 | CLDN17 | -1.511729176 | 2.836171551 | 0.010764505 | 0.107801265 |
| 1206 | SLC52A3 | -1.511977096 | 3.644110788 | 0.000641688 | 0.01210955 |
| 1207 | CDCA7 | -1.512842266 | 2.883936786 | 0.009118114 | 0.095390871 |
| 1208 | WFDC21P | -1.51459234 | 7.908283277 | 0.000350487 | 0.007612432 |
| 1209 | NOTCH3 | -1.518568095 | 5.098261933 | 3.34E-05 | 0.001150166 |
| 1210 | SAC3D1 | -1.519755966 | 4.016613712 | 0.000240507 | 0.005626164 |
| 1211 | ADCY7 | -1.520351885 | 3.008782848 | 0.005064216 | 0.06001946 |
| 1212 | MXD3 | -1.521058171 | 3.182420458 | 0.002840245 | 0.039023163 |
| 1213 | DKK3 | -1.522893563 | 3.902053101 | 0.000251332 | 0.005819662 |
| 1214 | MCAM | -1.526121398 | 4.564075817 | 5.04E-05 | 0.001615801 |
| 1215 | CLCA4 | -1.527969117 | 6.039990248 | 4.27E-05 | 0.001405137 |
| 1216 | LMTK3 | -1.532222229 | 3.034933906 | 0.00470962 | 0.056927908 |
| 1217 | MMP13 | -1.532860059 | 4.364351933 | 0.000105227 | 0.002969449 |
| 1218 | ITGA6 | -1.535715159 | 6.267618602 | 5.00E-05 | 0.001604774 |
| 1219 | UQCRHL | -1.536417264 | 5.443054813 | 2.95E-05 | 0.001039974 |
| 1220 | SLC16A1 | -1.539605525 | 3.479346357 | 0.00087663 | 0.01563924 |
| 1221 | HMGB2 | -1.539735893 | 6.379500315 | 6.17E-05 | 0.001887514 |
| 1222 | HOMER3 | -1.542823058 | 5.619413817 | 2.14E-05 | 0.000794516 |
| 1223 | KRT15 | -1.543672515 | 7.651761876 | 0.00023813 | 0.005579152 |
| 1224 | CCDC3 | -1.543785372 | 3.238836169 | 0.001938278 | 0.028793301 |
| 1225 | PLEKHN1 | -1.544926549 | 3.125589805 | 0.002899337 | 0.039648296 |
| 1226 | C19orf48 | -1.545144856 | 5.497072055 | 2.21E-05 | 0.000813535 |
| 1227 | WDR4 | -1.55041885 | 3.6391207 | 0.000484541 | 0.009900808 |
| 1228 | TP63 | -1.552293353 | 5.465472876 | 2.18E-05 | 0.000806365 |
| 1229 | TUBA4A | -1.558428741 | 6.755455854 | 5.63E-05 | 0.001757591 |
| 1230 | SNORA73B | -1.56015429 | 3.422852688 | 0.001169109 | 0.019419496 |
| 1231 | SFRP1 | -1.569719037 | 2.639614405 | 0.020192429 | 0.172419264 |
| 1232 | CKMT1B | -1.572687236 | 4.75390362 | 3.13E-05 | 0.001091158 |
| 1233 | LOC729737 | -1.575272623 | 2.609787333 | 0.021693695 | 0.180963561 |
| 1234 | SLCO3A1 | -1.577015754 | 3.493535972 | 0.00064622 | 0.012172347 |
| 1235 | IL1R2 | -1.578133857 | 3.554128278 | 0.000543535 | 0.010915266 |
| 1236 | REEP4 | -1.582417483 | 5.878111027 | 1.70E-05 | 0.000664325 |
| 1237 | IRS1 | -1.58303657 | 2.866785916 | 0.007339821 | 0.079995094 |
| 1238 | SOX7 | -1.585786838 | 4.847577895 | 2.00E-05 | 0.00075226 |
| 1239 | TGFB1I1 | -1.590078538 | 2.636408326 | 0.018619796 | 0.163119293 |
| 1240 | PRG2 | -1.591073204 | 2.419939209 | 0.042141212 | 0.286002631 |
| 1241 | DTYMK | -1.593111814 | 5.335651665 | 1.89E-05 | 0.000721974 |
| 1242 | MYEOV | -1.593246013 | 3.384096635 | 0.000902702 | 0.015991618 |
| 1243 | SLC43A3 | -1.596902189 | 4.697668482 | 1.86E-05 | 0.000712171 |
| 1244 | SLC5A5 | -1.597903835 | 3.63198536 | 0.000372591 | 0.008000956 |
| 1245 | GJA4 | -1.60531326 | 2.426628135 | 0.040095883 | 0.277075872 |
| 1246 | DMC1 | -1.605693785 | 2.536643528 | 0.027288345 | 0.212566269 |
| 1247 | SLURP1 | -1.608795114 | 4.751413532 | 1.63E-05 | 0.000642381 |
| 1248 | EVPL | -1.608812631 | 5.629502529 | 9.77E-06 | 0.000413182 |
| 1249 | SFRP2 | -1.613264088 | 3.045052195 | 0.00276436 | 0.038292433 |
| 1250 | BICD2 | -1.613429529 | 4.612343453 | 1.74E-05 | 0.000674025 |
| 1251 | CST1 | -1.616408346 | 7.869822518 | 0.001879135 | 0.028087126 |
| 1252 | SERPINE1 | -1.617058039 | 3.845964975 | 0.000152004 | 0.003918031 |
| 1253 | PALM | -1.617774407 | 2.85789042 | 0.006667202 | 0.075001866 |
| 1254 | SOX15 | -1.618664516 | 5.950080149 | 1.04E-05 | 0.000435149 |
| 1255 | CERS3 | -1.620087046 | 4.027486874 | 7.23E-05 | 0.002173459 |
| 1256 | TGFBI | -1.627570285 | 5.300442311 | 1.19E-05 | 0.000486153 |
| 1257 | MAL | -1.634650429 | 6.228723417 | 2.82E-05 | 0.001002283 |
| 1258 | PKP3 | -1.640281899 | 7.351152799 | 4.81E-05 | 0.001563077 |
| 1259 | MCM5 | -1.640708989 | 5.256591037 | 8.16E-06 | 0.000353835 |
| 1260 | TEAD2 | -1.641357501 | 2.572713578 | 0.020271188 | 0.172703241 |
| 1261 | FAM212A | -1.644737775 | 4.189450143 | 4.13E-05 | 0.001368814 |
| 1262 | SNCG | -1.646786628 | 5.185633121 | 1.17E-05 | 0.000479525 |
| 1263 | POLR2J3 | -1.651146731 | 3.525153644 | 0.000394403 | 0.008362885 |
| 1264 | GJB3 | -1.651755865 | 6.360294902 | 1.15E-05 | 0.000473241 |
| 1265 | SPHK1 | -1.656116031 | 4.728111553 | 8.53E-06 | 0.000369027 |
| 1266 | SLC19A1 | -1.661445187 | 2.886257442 | 0.004637627 | 0.056288518 |
| 1267 | ELOVL6 | -1.66185814 | 2.892375462 | 0.004437001 | 0.054465991 |
| 1268 | COL6A1 | -1.663890196 | 3.66378165 | 0.000177024 | 0.004381869 |
| 1269 | CEACAM7 | -1.666872198 | 3.661066965 | 0.000177503 | 0.004381869 |
| 1270 | UCA1 | -1.666941088 | 4.78353148 | 9.75E-06 | 0.000413182 |
| 1271 | POLE2 | -1.668046238 | 2.64215742 | 0.013866885 | 0.131415138 |
| 1272 | LDHA | -1.669842947 | 9.27500129 | 0.000145086 | 0.003771736 |
| 1273 | LTF | -1.675038555 | 7.065822119 | 0.000209654 | 0.004981165 |
| 1274 | MMP7 | -1.676442003 | 5.745842134 | 5.78E-06 | 0.000267636 |
| 1275 | LTB4R2 | -1.679927695 | 4.824302792 | 5.77E-06 | 0.000267636 |
| 1276 | CENPN | -1.680842546 | 3.689511799 | 0.000158565 | 0.004025645 |
| 1277 | WDR62 | -1.682059778 | 2.476029257 | 0.026746709 | 0.20963786 |
| 1278 | EFNB1 | -1.683416167 | 5.068439551 | 4.44E-06 | 0.000216528 |
| 1279 | MCM6 | -1.685683285 | 4.271826549 | 1.91E-05 | 0.000727309 |
| 1280 | COL7A1 | -1.685866865 | 3.888385532 | 6.01E-05 | 0.001848015 |
| 1281 | EGR1 | -1.68744862 | 4.188060612 | 2.39E-05 | 0.000871522 |
| 1282 | PHLDA2 | -1.692852901 | 5.766725649 | 4.82E-06 | 0.000230348 |
| 1283 | SEMA6A | -1.693661401 | 2.49850608 | 0.023150558 | 0.189612953 |
| 1284 | HAS3 | -1.696898181 | 4.949314038 | 4.90E-06 | 0.000233414 |
| 1285 | CDH3 | -1.698719098 | 6.492910836 | 9.52E-06 | 0.00040469 |
| 1286 | COL3A1 | -1.702551084 | 3.630232958 | 0.000155955 | 0.003979342 |
| 1287 | EIF4EBP1 | -1.703969162 | 6.780019066 | 2.75E-05 | 0.000978663 |
| 1288 | GNB1L | -1.704827969 | 2.907941526 | 0.003403433 | 0.044698031 |
| 1289 | UBE2S | -1.708175236 | 6.369904895 | 1.36E-05 | 0.000547887 |
| 1290 | RAMP2 | -1.716149388 | 2.952565494 | 0.002484593 | 0.035187587 |
| 1291 | HMGA1 | -1.717119861 | 8.567911932 | 6.14E-05 | 0.001883259 |
| 1292 | HIST2H2AC | -1.719462611 | 2.640733877 | 0.011957772 | 0.117427487 |
| 1293 | CXCL12 | -1.720009003 | 2.816634441 | 0.004871038 | 0.058413975 |
| 1294 | FXYD5 | -1.721160297 | 7.486101869 | 2.63E-05 | 0.000949578 |
| 1295 | AJUBA | -1.721251309 | 4.051541998 | 2.69E-05 | 0.000964657 |
| 1296 | SH2D1B | -1.722872058 | 2.970156276 | 0.002295004 | 0.03283954 |
| 1297 | KIAA1524 | -1.724695449 | 2.459867072 | 0.024991299 | 0.200644053 |
| 1298 | KIF11 | -1.728898948 | 3.790859761 | 6.90E-05 | 0.002085295 |
| 1299 | SAPCD2 | -1.729675732 | 3.757410206 | 7.77E-05 | 0.00230472 |
| 1300 | COL6A3 | -1.731853115 | 2.530618242 | 0.018474758 | 0.162505085 |
| 1301 | HNRNPA1P10 | -1.735586974 | 6.932431482 | 9.96E-06 | 0.000420187 |
| 1302 | TTYH1 | -1.735591889 | 2.323228022 | 0.041959669 | 0.285210244 |
| 1303 | SLC10A6 | -1.736519315 | 2.698406052 | 0.008254575 | 0.087821269 |
| 1304 | LTB4R | -1.745660479 | 4.928127976 | 2.56E-06 | 0.000137844 |
| 1305 | KLC3 | -1.747111313 | 2.978289634 | 0.00185541 | 0.027926886 |
| 1306 | CCL26 | -1.747589409 | 4.816145071 | 7.81E-06 | 0.00034271 |
| 1307 | TGM5 | -1.752384831 | 2.324653698 | 0.039238504 | 0.273265582 |
| 1308 | P2RY6 | -1.752948521 | 2.943710155 | 0.002150154 | 0.031388109 |
| 1309 | COL1A2 | -1.75358065 | 3.297455717 | 0.000419555 | 0.008785776 |
| 1310 | PDLIM2 | -1.756109894 | 5.586565677 | 1.84E-06 | 0.000108618 |
| 1311 | S100A14 | -1.756444138 | 10.24109686 | 0.000145354 | 0.003772247 |
| 1312 | TMEM200A | -1.761811922 | 2.515801294 | 0.018041086 | 0.159522288 |
| 1313 | TIAM1 | -1.762124774 | 3.256919676 | 0.000467316 | 0.009613543 |
| 1314 | CXCL6 | -1.763893593 | 5.851942178 | 5.41E-06 | 0.000254983 |
| 1315 | KHDC1L | -1.764130338 | 2.826519588 | 0.003726846 | 0.047707406 |
| 1316 | IL36A | -1.765292038 | 2.462519501 | 0.021056451 | 0.177500855 |
| 1317 | LMNB2 | -1.772281907 | 5.457411796 | 1.52E-06 | 9.40E-05 |
| 1318 | LAMB3 | -1.772467356 | 7.286415486 | 1.70E-05 | 0.000664325 |
| 1319 | FAM89A | -1.773036047 | 2.636206267 | 0.009623575 | 0.099114888 |
| 1320 | ABLIM3 | -1.778071841 | 2.729090944 | 0.006359364 | 0.072212315 |
| 1321 | S100A9 | -1.783001153 | 13.05604409 | 0.000142299 | 0.003718392 |
| 1322 | ANXA8L1 | -1.784479894 | 3.880365009 | 2.66E-05 | 0.000955358 |
| 1323 | COL8A2 | -1.789098978 | 2.291839436 | 0.041358992 | 0.282715993 |
| 1324 | INA | -1.801278474 | 2.275952989 | 0.043204712 | 0.29113801 |
| 1325 | HBEGF | -1.803477057 | 4.170740683 | 7.51E-06 | 0.000332613 |
| 1326 | CHEK1 | -1.804683234 | 2.938480762 | 0.001744484 | 0.026671458 |
| 1327 | CDK1 | -1.809492337 | 4.919520154 | 1.63E-06 | 9.97E-05 |
| 1328 | CKS2 | -1.809523725 | 6.116943031 | 2.20E-06 | 0.000123076 |
| 1329 | UCHL1 | -1.815406354 | 3.250322589 | 0.000397065 | 0.008395868 |
| 1330 | HIST1H3H | -1.816359354 | 2.238957 | 0.048025723 | 0.31185908 |
| 1331 | SPINK7 | -1.816929054 | 5.834835887 | 4.08E-06 | 0.000202417 |
| 1332 | PNCK | -1.818116133 | 2.482390324 | 0.01718574 | 0.153388534 |
| 1333 | SLCO4A1 | -1.818432726 | 3.120847126 | 0.00061356 | 0.011821147 |
| 1334 | HSPB8 | -1.835751133 | 5.866513983 | 8.18E-07 | 5.55E-05 |
| 1335 | ASPG | -1.837961526 | 2.686993062 | 0.005881687 | 0.067986963 |
| 1336 | GRHL3 | -1.838091272 | 4.514059286 | 1.82E-06 | 0.000108618 |
| 1337 | C16orf59 | -1.84141792 | 2.800134842 | 0.003252088 | 0.043271873 |
| 1338 | DUSP7 | -1.841439357 | 4.682751377 | 1.10E-06 | 7.19E-05 |
| 1339 | H2AFX | -1.842315486 | 6.54831573 | 7.50E-06 | 0.000332613 |
| 1340 | MCM7 | -1.844049985 | 5.720585551 | 6.32E-07 | 4.44E-05 |
| 1341 | S100A7 | -1.846010543 | 8.6982406 | 7.08E-05 | 0.00213366 |
| 1342 | LY6D | -1.847806132 | 10.88724801 | 0.000172898 | 0.004305397 |
| 1343 | RNF225 | -1.849407789 | 2.408465491 | 0.021865372 | 0.181895931 |
| 1344 | SCEL | -1.85399594 | 4.987632462 | 6.24E-07 | 4.43E-05 |
| 1345 | TONSL | -1.855625026 | 2.766980107 | 0.003661106 | 0.046984713 |
| 1346 | SERPINB5 | -1.858615828 | 7.22883076 | 5.20E-06 | 0.00024591 |
| 1347 | TMPRSS11D | -1.859782389 | 6.567528091 | 1.47E-06 | 9.15E-05 |
| 1348 | KCNK7 | -1.864618381 | 2.273682163 | 0.036537681 | 0.260429612 |
| 1349 | OVOL1 | -1.865845982 | 4.004742398 | 7.73E-06 | 0.000340491 |
| 1350 | NNMT | -1.872209902 | 3.19210351 | 0.000297351 | 0.006638801 |
| 1351 | ANXA8 | -1.873752226 | 3.806568213 | 1.94E-05 | 0.000734096 |
| 1352 | AK4 | -1.878228634 | 2.720961056 | 0.004245696 | 0.052791282 |
| 1353 | ERCC6L | -1.881564621 | 2.488319786 | 0.013792593 | 0.130874465 |
| 1354 | ARHGEF39 | -1.891596176 | 2.374605354 | 0.022591216 | 0.186476784 |
| 1355 | ASPRV1 | -1.894388501 | 3.705442974 | 2.36E-05 | 0.000862862 |
| 1356 | CSTA | -1.89801851 | 9.734988454 | 2.12E-05 | 0.000792662 |
| 1357 | HSPB1 | -1.900112163 | 11.97715013 | 4.41E-05 | 0.00144502 |
| 1358 | GINS1 | -1.901497481 | 2.751002963 | 0.003275277 | 0.043390269 |
| 1359 | DSG1-AS1 | -1.904009437 | 2.192800259 | 0.047019892 | 0.307696553 |
| 1360 | GDPD2 | -1.905600777 | 2.54356099 | 0.009941491 | 0.101637519 |
| 1361 | NME1-NME2 | -1.908566084 | 2.862591001 | 0.001684988 | 0.026027873 |
| 1362 | BGN | -1.909345287 | 2.692598408 | 0.004288048 | 0.053187208 |
| 1363 | SPP1 | -1.910583252 | 2.722824205 | 0.003733569 | 0.047747482 |
| 1364 | LGALS7B | -1.91284334 | 6.916246507 | 3.37E-05 | 0.001154149 |
| 1365 | MMP2 | -1.916005908 | 3.925923479 | 6.25E-06 | 0.000284129 |
| 1366 | PROCR | -1.92264955 | 3.018149245 | 0.000616879 | 0.011863725 |
| 1367 | SERPINB2 | -1.924959358 | 7.067478095 | 2.90E-06 | 0.000154522 |
| 1368 | HRH1 | -1.9264681 | 2.756401779 | 0.002792212 | 0.038607797 |
| 1369 | TNFRSF6B | -1.929240771 | 5.797585142 | 5.91E-07 | 4.21E-05 |
| 1370 | MFGE8 | -1.934484197 | 4.272208145 | 1.16E-06 | 7.55E-05 |
| 1371 | IRX1 | -1.940403127 | 2.301283867 | 0.02745245 | 0.213406606 |
| 1372 | STMN1 | -1.941021917 | 6.587353667 | 1.33E-06 | 8.38E-05 |
| 1373 | KIRREL | -1.943609558 | 2.561239664 | 0.007766469 | 0.083565229 |
| 1374 | SLC38A5 | -1.943786221 | 4.259299569 | 1.80E-06 | 0.000108419 |
| 1375 | CRCT1 | -1.952176038 | 4.862503899 | 3.42E-07 | 2.58E-05 |
| 1376 | CDC25A | -1.954154005 | 2.811402363 | 0.001877426 | 0.028087126 |
| 1377 | MAP2 | -1.955789826 | 2.310471856 | 0.025873478 | 0.205196191 |
| 1378 | CST6 | -1.959651442 | 4.46762563 | 1.09E-06 | 7.14E-05 |
| 1379 | C1R | -1.961365566 | 5.448781874 | 1.07E-07 | 9.18E-06 |
| 1380 | TMEM79 | -1.963639858 | 5.546813287 | 1.13E-07 | 9.65E-06 |
| 1381 | VPS9D1-AS1 | -1.972254818 | 2.315530542 | 0.023659195 | 0.192494051 |
| 1382 | ZBED2 | -1.974277451 | 2.345934516 | 0.020555485 | 0.174342668 |
| 1383 | DOC2B | -1.976294099 | 4.405012419 | 4.74E-07 | 3.46E-05 |
| 1384 | AKR1B10 | -1.985569802 | 7.089393392 | 9.82E-07 | 6.48E-05 |
| 1385 | RTKN2 | -1.990272917 | 2.705345292 | 0.002952706 | 0.040132484 |
| 1386 | DUSP9 | -1.991582046 | 2.396396148 | 0.015125663 | 0.139937727 |
| 1387 | NDUFA4L2 | -1.992515693 | 2.797418229 | 0.001579643 | 0.024800566 |
| 1388 | CCNE2 | -1.994392239 | 2.55647307 | 0.006669248 | 0.075001866 |
| 1389 | APLNR | -1.996608539 | 2.250721787 | 0.030067831 | 0.22790305 |
| 1390 | FSTL3 | -1.998264847 | 3.074245053 | 0.000278447 | 0.006290749 |
| 1391 | SLC39A2 | -2.00132204 | 3.546551485 | 2.24E-05 | 0.000820001 |
| 1392 | FOXN1 | -2.00338469 | 2.790093522 | 0.001734651 | 0.026574639 |
| 1393 | PPP2R2C | -2.004394423 | 2.420202345 | 0.013224435 | 0.126675568 |
| 1394 | COL18A1 | -2.006438361 | 3.782723052 | 5.58E-06 | 0.00025996 |
| 1395 | GGT5 | -2.006702372 | 2.274481753 | 0.027077773 | 0.21147678 |
| 1396 | ALOXE3 | -2.007408569 | 2.308220887 | 0.022431724 | 0.185287505 |
| 1397 | RACGAP1 | -2.008039718 | 4.486820754 | 3.35E-07 | 2.54E-05 |
| 1398 | HPDL | -2.010781386 | 3.878913795 | 6.58E-06 | 0.000298141 |
| 1399 | CNFN | -2.011094958 | 7.888929833 | 1.83E-06 | 0.000108618 |
| 1400 | NDRG1 | -2.025078963 | 7.044604961 | 9.38E-07 | 6.22E-05 |
| 1401 | EPHX3 | -2.029579585 | 4.550661624 | 1.76E-07 | 1.44E-05 |
| 1402 | KRT24 | -2.031486554 | 6.290721476 | 2.15E-06 | 0.000121516 |
| 1403 | VWF | -2.033198539 | 3.397698243 | 4.01E-05 | 0.001334692 |
| 1404 | AMOTL1 | -2.03356839 | 3.332665714 | 5.55E-05 | 0.001745743 |
| 1405 | TNFSF9 | -2.036850559 | 2.539465672 | 0.006428611 | 0.072732217 |
| 1406 | AEBP1 | -2.041951761 | 2.607886755 | 0.004321923 | 0.053519935 |
| 1407 | LAD1 | -2.046010227 | 7.1841435 | 4.57E-07 | 3.37E-05 |
| 1408 | ADAMTS15 | -2.04792017 | 2.312660156 | 0.019291466 | 0.167649135 |
| 1409 | DCN | -2.048172817 | 3.21449351 | 0.000112883 | 0.003115968 |
| 1410 | S100A3 | -2.049853612 | 3.821609388 | 3.74E-06 | 0.000189522 |
| 1411 | ZNF488 | -2.051377675 | 2.121617344 | 0.046941607 | 0.307449299 |
| 1412 | P3H2 | -2.054219889 | 3.161177487 | 0.000122218 | 0.003289915 |
| 1413 | LCE3E | -2.054905712 | 2.160591567 | 0.038605477 | 0.27134646 |
| 1414 | AUNIP | -2.055170825 | 2.487022567 | 0.008018425 | 0.085577007 |
| 1415 | COL5A3 | -2.066903003 | 2.152713054 | 0.040498383 | 0.278712141 |
| 1416 | ETV4 | -2.069053011 | 3.814183725 | 3.27E-06 | 0.000170813 |
| 1417 | HSD11B1 | -2.069976158 | 2.358643013 | 0.014951998 | 0.13873546 |
| 1418 | CDT1 | -2.070409912 | 3.901119082 | 1.94E-06 | 0.000111852 |
| 1419 | IL1RN | -2.072024776 | 7.640250394 | 7.70E-07 | 5.31E-05 |
| 1420 | SH3PXD2A-AS1 | -2.073427934 | 3.618110702 | 8.12E-06 | 0.000353379 |
| 1421 | KPNA2 | -2.073912645 | 6.612996365 | 1.59E-07 | 1.31E-05 |
| 1422 | PGLYRP3 | -2.075581533 | 3.064966931 | 0.000180303 | 0.004429543 |
| 1423 | TINAGL1 | -2.079740105 | 4.858426393 | 6.83E-08 | 6.36E-06 |
| 1424 | GOLGA7B | -2.084727682 | 2.19797234 | 0.031657729 | 0.235985489 |
| 1425 | C1S | -2.088371086 | 5.063749096 | 3.22E-08 | 3.31E-06 |
| 1426 | AIM1L | -2.088663048 | 3.639591115 | 6.10E-06 | 0.000278186 |
| 1427 | SGOL1 | -2.089770393 | 2.423103932 | 0.010273932 | 0.10419428 |
| 1428 | EGFL7 | -2.093596496 | 3.20002067 | 7.45E-05 | 0.002227114 |
| 1429 | GDPD3 | -2.096883355 | 5.949355608 | 4.13E-08 | 4.13E-06 |
| 1430 | PRSS27 | -2.102009926 | 4.838166157 | 5.99E-08 | 5.65E-06 |
| 1431 | ARHGAP11A | -2.103651862 | 3.193143052 | 7.49E-05 | 0.002233277 |
| 1432 | FOSB | -2.105578462 | 3.057241731 | 0.000181186 | 0.004443891 |
| 1433 | ALOX12B | -2.108193549 | 2.294326021 | 0.018768622 | 0.164044452 |
| 1434 | CYP4F22 | -2.109700934 | 2.339731818 | 0.014959159 | 0.13873546 |
| 1435 | CDC25B | -2.111989036 | 5.210583709 | 2.63E-08 | 2.73E-06 |
| 1436 | NRGN | -2.117451636 | 2.187049725 | 0.031129739 | 0.233158217 |
| 1437 | ESAM | -2.118950984 | 2.504792319 | 0.00590635 | 0.068190265 |
| 1438 | TTK | -2.130535647 | 3.285522903 | 3.92E-05 | 0.001311345 |
| 1439 | UNC13D | -2.131314957 | 3.355446416 | 2.50E-05 | 0.000907433 |
| 1440 | SDR9C7 | -2.132840792 | 2.448208008 | 0.007793328 | 0.083794831 |
| 1441 | KDR | -2.133634551 | 2.578293532 | 0.003624149 | 0.046628669 |
| 1442 | CENPF | -2.134984844 | 3.273088411 | 3.99E-05 | 0.001330722 |
| 1443 | CYP2E1 | -2.139095041 | 3.475667353 | 1.27E-05 | 0.000513996 |
| 1444 | MUC5B | -2.144813719 | 5.406681124 | 2.73E-08 | 2.82E-06 |
| 1445 | VSIG10L | -2.146318897 | 3.173691516 | 5.86E-05 | 0.001809421 |
| 1446 | GJA1 | -2.150029891 | 4.154499972 | 2.55E-07 | 2.00E-05 |
| 1447 | FAM46B | -2.15093633 | 4.521223434 | 4.69E-08 | 4.56E-06 |
| 1448 | LAMA4 | -2.151621202 | 2.715035363 | 0.001413295 | 0.022713682 |
| 1449 | SKA3 | -2.157547634 | 2.99878332 | 0.000186206 | 0.004544989 |
| 1450 | SOD3 | -2.161973963 | 2.255497231 | 0.020472531 | 0.173833317 |
| 1451 | KRT78 | -2.163762926 | 4.336716799 | 7.33E-08 | 6.71E-06 |
| 1452 | FLT1 | -2.165378489 | 2.66159734 | 0.00209441 | 0.030722056 |
| 1453 | CYP27C1 | -2.171252263 | 2.433409106 | 0.007382524 | 0.080345148 |
| 1454 | SPAG5 | -2.17302188 | 3.700264854 | 2.49E-06 | 0.00013545 |
| 1455 | MRGPRX3 | -2.174854569 | 2.214272656 | 0.022794207 | 0.187770836 |
| 1456 | ZWINT | -2.176995989 | 5.03709753 | 1.45E-08 | 1.65E-06 |
| 1457 | SERPINB4 | -2.195327428 | 8.848192709 | 7.81E-07 | 5.34E-05 |
| 1458 | CLEC14A | -2.195412775 | 2.36819386 | 0.010173812 | 0.103524679 |
| 1459 | KRT1 | -2.198720129 | 2.229804833 | 0.020672474 | 0.175041549 |
| 1460 | CHI3L1 | -2.199218694 | 4.334386989 | 7.21E-08 | 6.64E-06 |
| 1461 | THBS1 | -2.20025931 | 3.2072197 | 3.63E-05 | 0.001228206 |
| 1462 | TINCR | -2.203585281 | 3.016860494 | 0.00012829 | 0.003410558 |
| 1463 | KIF15 | -2.204688607 | 2.233230491 | 0.020354315 | 0.173314193 |
| 1464 | MEOX1 | -2.205390788 | 2.802249222 | 0.000622663 | 0.011931624 |
| 1465 | FSCN1 | -2.206312467 | 6.483035961 | 1.89E-08 | 2.07E-06 |
| 1466 | LY6G6C | -2.217789474 | 4.130245649 | 1.46E-07 | 1.22E-05 |
| 1467 | LUM | -2.218576264 | 3.243803415 | 3.31E-05 | 0.001146159 |
| 1468 | CLSPN | -2.219022151 | 2.13238165 | 0.032453222 | 0.239938031 |
| 1469 | RDH12 | -2.226013572 | 2.447834283 | 0.005851262 | 0.067759398 |
| 1470 | NMU | -2.227482998 | 6.485996963 | 1.42E-08 | 1.65E-06 |
| 1471 | ALOX12 | -2.228217137 | 2.48803078 | 0.004554257 | 0.055625684 |
| 1472 | GSG2 | -2.228747925 | 2.216220321 | 0.021115601 | 0.177703465 |
| 1473 | NRM | -2.230203232 | 4.224163153 | 1.54E-07 | 1.28E-05 |
| 1474 | LGALS7 | -2.239473427 | 6.932330495 | 3.87E-08 | 3.89E-06 |
| 1475 | SMTN | -2.247904985 | 3.488515817 | 4.45E-06 | 0.000216528 |
| 1476 | CEMIP | -2.248414598 | 2.69192848 | 0.001124509 | 0.018896077 |
| 1477 | S100A8 | -2.255243795 | 12.16131564 | 1.74E-06 | 0.000105641 |
| 1478 | MND1 | -2.255762278 | 3.18497521 | 3.20E-05 | 0.00111215 |
| 1479 | FZD7 | -2.256982284 | 2.462620606 | 0.004802818 | 0.057778429 |
| 1480 | RAD51 | -2.258662992 | 3.077338814 | 6.42E-05 | 0.001952992 |
| 1481 | PLAT | -2.265262921 | 6.962095833 | 3.25E-08 | 3.31E-06 |
| 1482 | CAPN14 | -2.27036968 | 3.968482692 | 1.94E-07 | 1.56E-05 |
| 1483 | PHLDB2 | -2.27689386 | 2.581088365 | 0.002194769 | 0.031873471 |
| 1484 | UPK3B | -2.2782189 | 4.513514454 | 5.66E-08 | 5.37E-06 |
| 1485 | NCAPH | -2.278755409 | 2.674464324 | 0.001135891 | 0.018992391 |
| 1486 | C1QTNF1 | -2.281207885 | 2.206604273 | 0.019666974 | 0.169843003 |
| 1487 | KIAA0101 | -2.292345089 | 3.773087822 | 8.52E-07 | 5.71E-05 |
| 1488 | LMNB1 | -2.293794787 | 5.027777908 | 3.54E-09 | 4.69E-07 |
| 1489 | THBD | -2.30502553 | 4.237139482 | 2.46E-08 | 2.63E-06 |
| 1490 | CLIC3 | -2.305611413 | 5.974237053 | 2.65E-09 | 3.76E-07 |
| 1491 | DTL | -2.305733896 | 2.590791448 | 0.001852836 | 0.027926886 |
| 1492 | ADGRF4 | -2.308944134 | 3.214045441 | 1.65E-05 | 0.000650247 |
| 1493 | CENPE | -2.30969371 | 2.367251115 | 0.007579314 | 0.081899744 |
| 1494 | CAMK2N1 | -2.312671384 | 2.821085438 | 0.000324945 | 0.007143127 |
| 1495 | ADGRL4 | -2.319442198 | 2.11623209 | 0.029238587 | 0.223627316 |
| 1496 | GPR68 | -2.33636462 | 3.113942486 | 2.73E-05 | 0.000973763 |
| 1497 | CHI3L2 | -2.339780572 | 3.012123395 | 5.83E-05 | 0.001801737 |
| 1498 | CBX2 | -2.339989401 | 2.295309844 | 0.010689424 | 0.107261619 |
| 1499 | DEPDC1 | -2.344890949 | 2.499233877 | 0.002958185 | 0.040170982 |
| 1500 | LOC101927746 | -2.34836848 | 2.299211933 | 0.010370911 | 0.10479797 |
| 1501 | AKR1B15 | -2.350755663 | 2.311529534 | 0.009573039 | 0.09876657 |
| 1502 | RNASE7 | -2.355484755 | 3.140938588 | 2.06E-05 | 0.000771528 |
| 1503 | TEAD4 | -2.356249203 | 3.494655808 | 1.83E-06 | 0.000108618 |
| 1504 | DSC3 | -2.35714018 | 5.517851946 | 8.85E-10 | 1.37E-07 |
| 1505 | MELK | -2.364193453 | 3.703853051 | 4.65E-07 | 3.41E-05 |
| 1506 | SULT2B1 | -2.364284976 | 6.335668514 | 1.15E-09 | 1.74E-07 |
| 1507 | EHD2 | -2.369350957 | 4.35531091 | 6.90E-09 | 8.66E-07 |
| 1508 | SERPINB13 | -2.371018534 | 5.871522105 | 8.07E-10 | 1.28E-07 |
| 1509 | TICRR | -2.37367598 | 2.104383818 | 0.027615718 | 0.213909096 |
| 1510 | PDPN | -2.384536502 | 3.208151544 | 1.11E-05 | 0.000459984 |
| 1511 | FDCSP | -2.38924657 | 4.579261593 | 5.42E-09 | 6.97E-07 |
| 1512 | NEIL3 | -2.39316969 | 2.146200153 | 0.021239756 | 0.178275604 |
| 1513 | FAM83C | -2.396526925 | 3.436442919 | 2.05E-06 | 0.000117084 |
| 1514 | UPP1 | -2.398569079 | 5.334048237 | 3.08E-10 | 5.20E-08 |
| 1515 | COL12A1 | -2.406649976 | 2.903765607 | 9.88E-05 | 0.00280786 |
| 1516 | COL6A2 | -2.412474976 | 3.426763047 | 2.05E-06 | 0.000117084 |
| 1517 | RAD54L | -2.412866114 | 2.444034537 | 0.003379507 | 0.044499286 |
| 1518 | TYMSOS | -2.416508904 | 2.523349206 | 0.00196075 | 0.029013746 |
| 1519 | LCE3D | -2.429212957 | 2.801819654 | 0.00019901 | 0.004788217 |
| 1520 | PLA2G2A | -2.438384961 | 2.306674958 | 0.00795613 | 0.085123303 |
| 1521 | UPK2 | -2.440254961 | 2.390786238 | 0.004371591 | 0.054002785 |
| 1522 | CDH13 | -2.440532189 | 3.207581152 | 7.24E-06 | 0.000323504 |
| 1523 | TACC3 | -2.44204896 | 4.785121076 | 9.27E-10 | 1.42E-07 |
| 1524 | AURKA | -2.44465326 | 4.265510584 | 7.79E-09 | 9.69E-07 |
| 1525 | CENPW | -2.445134709 | 5.373132768 | 4.59E-10 | 7.49E-08 |
| 1526 | TMPRSS11E | -2.45386303 | 5.790821387 | 5.04E-10 | 8.05E-08 |
| 1527 | EREG | -2.46160463 | 2.647811147 | 0.000706195 | 0.013027276 |
| 1528 | SERPINE2 | -2.463459219 | 4.895423664 | 2.55E-10 | 4.50E-08 |
| 1529 | CYSRT1 | -2.46467264 | 5.679743113 | 2.04E-10 | 3.74E-08 |
| 1530 | PXDN | -2.466132878 | 3.383764247 | 1.85E-06 | 0.000108921 |
| 1531 | TOP2A | -2.470869281 | 4.443497523 | 1.79E-09 | 2.61E-07 |
| 1532 | ASF1B | -2.47474211 | 4.689324092 | 1.67E-09 | 2.46E-07 |
| 1533 | CRYAB | -2.474782837 | 3.406129995 | 1.87E-06 | 0.000109696 |
| 1534 | UPK1A | -2.481435239 | 1.952837139 | 0.043564519 | 0.292583728 |
| 1535 | NIPAL4 | -2.487272427 | 2.90548091 | 6.79E-05 | 0.002058242 |
| 1536 | NRG1 | -2.505366679 | 2.915977855 | 5.62E-05 | 0.001757591 |
| 1537 | VSNL1 | -2.509255876 | 4.265378619 | 2.76E-09 | 3.85E-07 |
| 1538 | ANGPTL4 | -2.512312835 | 3.670670374 | 1.44E-07 | 1.21E-05 |
| 1539 | NUF2 | -2.512771838 | 3.145476137 | 8.03E-06 | 0.000350224 |
| 1540 | CCNF | -2.515061685 | 3.261899702 | 3.43E-06 | 0.000177966 |
| 1541 | SPARC | -2.523799107 | 4.398454313 | 8.30E-10 | 1.30E-07 |
| 1542 | TENM2 | -2.529055521 | 2.538475336 | 0.001223315 | 0.020134859 |
| 1543 | IGFL2 | -2.529722661 | 2.050793566 | 0.02689793 | 0.210714332 |
| 1544 | ROBO4 | -2.532028046 | 2.183174982 | 0.013221217 | 0.126675568 |
| 1545 | PTGDS | -2.533188917 | 2.25328038 | 0.00880445 | 0.092693745 |
| 1546 | A2ML1 | -2.534593946 | 4.671498326 | 3.31E-10 | 5.52E-08 |
| 1547 | CD109 | -2.542147866 | 4.003845321 | 9.46E-09 | 1.14E-06 |
| 1548 | PTRF | -2.545954528 | 5.661860846 | 3.16E-11 | 7.06E-09 |
| 1549 | LOXL2 | -2.558666713 | 2.383884129 | 0.00325917 | 0.043290212 |
| 1550 | MOXD1 | -2.558985175 | 2.140153087 | 0.016216718 | 0.146959633 |
| 1551 | WFDC5 | -2.55992673 | 2.621385857 | 0.00058409 | 0.011471557 |
| 1552 | HIST1H2BH | -2.564438577 | 2.970267013 | 2.46E-05 | 0.000897103 |
| 1553 | CDC6 | -2.569441282 | 3.238825996 | 2.76E-06 | 0.00014816 |
| 1554 | GINS2 | -2.570118992 | 4.24695858 | 2.92E-09 | 3.99E-07 |
| 1555 | NCCRP1 | -2.572041735 | 6.550833525 | 1.41E-10 | 2.69E-08 |
| 1556 | HR | -2.573495053 | 3.911031433 | 1.27E-08 | 1.48E-06 |
| 1557 | FOXM1 | -2.575138684 | 4.273909879 | 1.36E-09 | 2.04E-07 |
| 1558 | FLNA | -2.575441046 | 6.177171316 | 4.38E-11 | 9.64E-09 |
| 1559 | ANLN | -2.576588368 | 4.146457427 | 2.72E-09 | 3.82E-07 |
| 1560 | TNIP3 | -2.578522771 | 3.840615092 | 2.61E-08 | 2.73E-06 |
| 1561 | CDCA8 | -2.580268546 | 3.792573013 | 4.32E-08 | 4.23E-06 |
| 1562 | KIF23 | -2.581829646 | 3.510881919 | 2.87E-07 | 2.22E-05 |
| 1563 | CRABP2 | -2.585249554 | 6.82648278 | 3.02E-10 | 5.16E-08 |
| 1564 | UPK3BL | -2.587386726 | 6.708293161 | 1.79E-10 | 3.32E-08 |
| 1565 | EXO1 | -2.595484421 | 2.557730848 | 0.00084086 | 0.015143459 |
| 1566 | CDC25C | -2.597286069 | 2.813025586 | 9.53E-05 | 0.002730415 |
| 1567 | LOC729966 | -2.602429734 | 4.569832638 | 2.31E-09 | 3.31E-07 |
| 1568 | PRC1 | -2.610063337 | 4.581357829 | 2.47E-10 | 4.41E-08 |
| 1569 | CCNB1 | -2.615016622 | 5.831327952 | 3.10E-11 | 7.03E-09 |
| 1570 | IQGAP3 | -2.622309179 | 2.512848648 | 0.001081847 | 0.018372036 |
| 1571 | KIF4A | -2.624872076 | 3.249364451 | 1.92E-06 | 0.000111441 |
| 1572 | PKP1 | -2.628697653 | 6.324130194 | 9.82E-11 | 1.95E-08 |
| 1573 | CD34 | -2.639593917 | 2.723285335 | 0.000184192 | 0.004510319 |
| 1574 | SPRR3 | -2.639625888 | 10.54553971 | 1.45E-08 | 1.65E-06 |
| 1575 | BUB1 | -2.641811923 | 3.423172998 | 4.01E-07 | 3.02E-05 |
| 1576 | APOBEC3A | -2.649142705 | 3.341610206 | 7.81E-07 | 5.34E-05 |
| 1577 | DIAPH3 | -2.656882404 | 2.405157138 | 0.002164798 | 0.031571524 |
| 1578 | WNT7A | -2.659193028 | 2.043919565 | 0.021879732 | 0.181915711 |
| 1579 | DEFB4A | -2.659681518 | 7.126432554 | 7.49E-08 | 6.81E-06 |
| 1580 | CTSV | -2.661071809 | 3.51310986 | 1.57E-07 | 1.31E-05 |
| 1581 | CDA | -2.661519292 | 2.891882115 | 3.37E-05 | 0.001154149 |
| 1582 | ANO1 | -2.669243524 | 4.861981241 | 2.17E-11 | 4.99E-09 |
| 1583 | OIP5 | -2.67160849 | 3.01685203 | 9.04E-06 | 0.000385527 |
| 1584 | ORC1 | -2.67464357 | 2.87369548 | 3.77E-05 | 0.001263628 |
| 1585 | PMCH | -2.679769591 | 2.28324528 | 0.004728495 | 0.057065195 |
| 1586 | CDCA5 | -2.680115651 | 3.769034648 | 2.17E-08 | 2.35E-06 |
| 1587 | NUSAP1 | -2.683265941 | 4.374904969 | 2.72E-10 | 4.69E-08 |
| 1588 | PTTG1 | -2.688290175 | 6.934785485 | 2.61E-10 | 4.55E-08 |
| 1589 | IL36RN | -2.694983963 | 2.829490581 | 5.37E-05 | 0.001699138 |
| 1590 | ARSI | -2.71600477 | 2.21411009 | 0.006932865 | 0.077166244 |
| 1591 | CA2 | -2.722405756 | 5.352625315 | 5.06E-12 | 1.33E-09 |
| 1592 | PTHLH | -2.726876489 | 4.524551993 | 5.47E-11 | 1.17E-08 |
| 1593 | UHRF1 | -2.735106851 | 2.969035907 | 1.06E-05 | 0.000441241 |
| 1594 | LIPG | -2.736979109 | 2.149620219 | 0.010406821 | 0.104911255 |
| 1595 | ASPM | -2.741253767 | 2.482822204 | 0.000942428 | 0.01654098 |
| 1596 | FOSL1 | -2.744597839 | 3.825972613 | 5.51E-09 | 7.03E-07 |
| 1597 | PLVAP | -2.74811616 | 3.506156761 | 1.02E-07 | 8.99E-06 |
| 1598 | KIF20A | -2.75385917 | 4.18848453 | 4.65E-10 | 7.51E-08 |
| 1599 | ADAMTS1 | -2.760687245 | 2.708753273 | 0.00011645 | 0.003191241 |
| 1600 | CDC20 | -2.762570952 | 5.998019493 | 7.94E-12 | 2.01E-09 |
| 1601 | CKAP2L | -2.762876654 | 2.656577563 | 0.000204158 | 0.004873477 |
| 1602 | RGS20 | -2.76578848 | 2.289649251 | 0.003904618 | 0.049235806 |
| 1603 | KIF18B | -2.778371225 | 2.559481252 | 0.000461419 | 0.00953097 |
| 1604 | OLFM1 | -2.779919463 | 3.093179541 | 3.21E-06 | 0.000168885 |
| 1605 | THY1 | -2.785907509 | 2.704769959 | 0.000116749 | 0.003193665 |
| 1606 | KRT4 | -2.786605998 | 10.53321487 | 3.55E-09 | 4.69E-07 |
| 1607 | KRT75 | -2.788589182 | 2.335790348 | 0.002638341 | 0.036849399 |
| 1608 | GTSE1 | -2.791036487 | 2.693876704 | 0.000128497 | 0.003410558 |
| 1609 | HMMR | -2.796637226 | 3.099000808 | 2.24E-06 | 0.000124207 |
| 1610 | DLGAP5 | -2.797200531 | 3.54284034 | 4.23E-08 | 4.20E-06 |
| 1611 | FAM25A | -2.801177588 | 5.399421982 | 2.06E-12 | 6.01E-10 |
| 1612 | BUB1B | -2.80459387 | 3.200980109 | 8.39E-07 | 5.66E-05 |
| 1613 | PRR11 | -2.805382567 | 2.823663613 | 3.48E-05 | 0.001181717 |
| 1614 | CDCA2 | -2.805717325 | 2.826675869 | 3.27E-05 | 0.001134579 |
| 1615 | HNRNPA1P33 | -2.807806241 | 3.11071877 | 2.43E-06 | 0.00013295 |
| 1616 | ADAMTSL4 | -2.81614428 | 2.875628136 | 1.87E-05 | 0.000714632 |
| 1617 | SKA1 | -2.825232948 | 2.741051265 | 7.03E-05 | 0.002120835 |
| 1618 | MCM10 | -2.829046773 | 2.323698415 | 0.002536041 | 0.035749471 |
| 1619 | CDH5 | -2.837965685 | 2.280338651 | 0.003651876 | 0.046905909 |
| 1620 | CPA4 | -2.840475597 | 6.674801199 | 4.28E-12 | 1.18E-09 |
| 1621 | ESPL1 | -2.845483616 | 2.735164675 | 7.45E-05 | 0.002227114 |
| 1622 | PSRC1 | -2.861458818 | 3.276713045 | 3.31E-07 | 2.54E-05 |
| 1623 | GJB6 | -2.864549569 | 3.757078697 | 3.10E-09 | 4.16E-07 |
| 1624 | PHF19 | -2.866920274 | 4.231597057 | 1.15E-10 | 2.21E-08 |
| 1625 | TUBB6 | -2.882265648 | 6.219698894 | 9.81E-13 | 3.04E-10 |
| 1626 | C10orf99 | -2.884619819 | 3.385304337 | 1.04E-07 | 9.03E-06 |
| 1627 | CALB2 | -2.911670585 | 2.588028449 | 0.00018855 | 0.004594815 |
| 1628 | SFN | -2.911950995 | 9.914513015 | 4.33E-10 | 7.15E-08 |
| 1629 | LYPD3 | -2.915140827 | 8.645821539 | 2.34E-10 | 4.23E-08 |
| 1630 | EMP1 | -2.915562923 | 7.462487386 | 1.35E-11 | 3.16E-09 |
| 1631 | SOX18 | -2.919318958 | 2.398516996 | 0.001123907 | 0.018896077 |
| 1632 | DEPDC1B | -2.932809006 | 2.588509653 | 0.000198992 | 0.004788217 |
| 1633 | IL36G | -2.94699051 | 3.511044488 | 1.69E-08 | 1.88E-06 |
| 1634 | ESCO2 | -2.957780055 | 2.492041511 | 0.000450559 | 0.009357575 |
| 1635 | NES | -2.959456585 | 2.310476477 | 0.00191414 | 0.028518614 |
| 1636 | SPC24 | -2.963837031 | 2.808195589 | 2.00E-05 | 0.00075226 |
| 1637 | DSC2 | -2.983380548 | 4.99716017 | 2.71E-13 | 9.14E-11 |
| 1638 | ECM1 | -2.997449145 | 6.101692895 | 2.50E-13 | 8.82E-11 |
| 1639 | RAMP3 | -2.998992403 | 2.643950249 | 9.74E-05 | 0.002780188 |
| 1640 | KRT5 | -3.003357604 | 11.44717298 | 1.40E-09 | 2.08E-07 |
| 1641 | CEP55 | -3.011723589 | 4.01998501 | 1.08E-10 | 2.11E-08 |
| 1642 | CCNB2 | -3.016726491 | 4.847719117 | 9.49E-13 | 3.00E-10 |
| 1643 | E2F2 | -3.025609879 | 3.205348626 | 1.96E-07 | 1.57E-05 |
| 1644 | TYMS | -3.030061285 | 5.546156384 | 2.64E-13 | 9.11E-11 |
| 1645 | HJURP | -3.032800675 | 2.970532671 | 2.17E-06 | 0.00012192 |
| 1646 | FAM111B | -3.038999332 | 2.887931307 | 5.88E-06 | 0.000271271 |
| 1647 | NDC80 | -3.053217802 | 3.652082884 | 3.04E-09 | 4.11E-07 |
| 1648 | SPRR2B | -3.055035471 | 2.878094265 | 5.56E-06 | 0.000259582 |
| 1649 | GJB2 | -3.067800693 | 7.194328794 | 8.28E-13 | 2.68E-10 |
| 1650 | STC1 | -3.085457512 | 4.59291871 | 2.15E-12 | 6.17E-10 |
| 1651 | RAET1L | -3.09792871 | 4.13271828 | 1.33E-11 | 3.16E-09 |
| 1652 | KLK13 | -3.134573119 | 6.586196998 | 3.41E-14 | 1.36E-11 |
| 1653 | CDCA3 | -3.140986509 | 3.547755922 | 4.22E-09 | 5.48E-07 |
| 1654 | CDC45 | -3.15423693 | 3.278727387 | 5.11E-08 | 4.94E-06 |
| 1655 | RHCG | -3.181435614 | 6.072740424 | 8.66E-15 | 4.24E-12 |
| 1656 | FAM64A | -3.182828607 | 3.122853161 | 1.91E-07 | 1.54E-05 |
| 1657 | KLK9 | -3.188268464 | 3.234123605 | 5.33E-08 | 5.12E-06 |
| 1658 | IGFL1 | -3.188903123 | 3.45124182 | 5.69E-09 | 7.20E-07 |
| 1659 | SHCBP1 | -3.189829117 | 3.11874519 | 1.90E-07 | 1.54E-05 |
| 1660 | DSG3 | -3.192226871 | 6.421028153 | 2.34E-14 | 9.62E-12 |
| 1661 | CENPA | -3.192455279 | 3.094789552 | 2.45E-07 | 1.93E-05 |
| 1662 | KLK5 | -3.194530208 | 4.174822798 | 2.89E-12 | 8.12E-10 |
| 1663 | COL4A2 | -3.20141247 | 3.155597147 | 1.02E-07 | 8.99E-06 |
| 1664 | EDN2 | -3.223448162 | 3.910817219 | 4.50E-11 | 9.75E-09 |
| 1665 | SELE | -3.22694268 | 2.265256258 | 0.00170912 | 0.02628963 |
| 1666 | COL17A1 | -3.237932082 | 5.78420998 | 9.66E-16 | 7.06E-13 |
| 1667 | GAL | -3.252324065 | 2.194160403 | 0.00259189 | 0.036435258 |
| 1668 | KRT13 | -3.27558824 | 10.48459596 | 6.85E-11 | 1.43E-08 |
| 1669 | TUBB3 | -3.280883905 | 4.032643819 | 1.10E-11 | 2.65E-09 |
| 1670 | TROAP | -3.281507828 | 3.798435819 | 7.55E-11 | 1.55E-08 |
| 1671 | KLK7 | -3.283323246 | 5.706403249 | 4.40E-16 | 4.03E-13 |
| 1672 | CRABP1 | -3.283981091 | 2.425973974 | 0.000391141 | 0.008305325 |
| 1673 | KLK6 | -3.284413022 | 5.426931024 | 3.64E-15 | 2.13E-12 |
| 1674 | TMEM256-PLSCR3 | -3.299550653 | 2.067849602 | 0.004977369 | 0.059267776 |
| 1675 | SPRR1A | -3.304836631 | 10.29621263 | 9.59E-12 | 2.39E-09 |
| 1676 | PSORS1C2 | -3.306828223 | 2.529645057 | 0.000133799 | 0.003518494 |
| 1677 | TK1 | -3.312539632 | 5.8404089 | 1.76E-14 | 7.85E-12 |
| 1678 | LOC100505817 | -3.31291183 | 2.836099544 | 2.56E-06 | 0.000137844 |
| 1679 | TPX2 | -3.322592721 | 4.555455498 | 6.18E-14 | 2.29E-11 |
| 1680 | KLK10 | -3.329976707 | 6.935037452 | 5.43E-15 | 2.75E-12 |
| 1681 | CAV1 | -3.337869833 | 5.519916901 | 5.20E-16 | 4.39E-13 |
| 1682 | CDKN3 | -3.34010222 | 4.512508257 | 2.95E-13 | 9.72E-11 |
| 1683 | FST | -3.351776067 | 3.786077167 | 6.63E-11 | 1.40E-08 |
| 1684 | KIF2C | -3.360484954 | 4.175376726 | 1.69E-12 | 5.03E-10 |
| 1685 | KLK8 | -3.366418763 | 4.715787581 | 5.13E-15 | 2.69E-12 |
| 1686 | KIFC1 | -3.374076943 | 4.018792441 | 5.07E-12 | 1.33E-09 |
| 1687 | PLA2G4E | -3.375885167 | 2.493125992 | 0.000133954 | 0.003518494 |
| 1688 | SPC25 | -3.393986827 | 3.309364657 | 9.42E-09 | 1.14E-06 |
| 1689 | DEFB4B | -3.405748464 | 3.209954514 | 1.54E-08 | 1.71E-06 |
| 1690 | SLC7A5 | -3.407773827 | 4.465892453 | 2.28E-14 | 9.60E-12 |
| 1691 | LINC00707 | -3.41980391 | 2.566725373 | 5.60E-05 | 0.001757591 |
| 1692 | UBE2C | -3.43898236 | 6.144830757 | 2.34E-15 | 1.62E-12 |
| 1693 | KRT6C | -3.440627643 | 3.742469617 | 1.61E-10 | 3.01E-08 |
| 1694 | NCAPG | -3.467711575 | 3.061259379 | 8.44E-08 | 7.62E-06 |
| 1695 | PBK | -3.474031927 | 3.969343567 | 4.76E-12 | 1.29E-09 |
| 1696 | PRSS3 | -3.493761524 | 5.336215952 | 8.01E-17 | 1.01E-13 |
| 1697 | HEPHL1 | -3.497993713 | 2.252437691 | 0.000869732 | 0.015552732 |
| 1698 | APOBEC3B | -3.513706683 | 4.400429216 | 5.78E-14 | 2.19E-11 |
| 1699 | MKI67 | -3.518421036 | 3.799579816 | 1.02E-11 | 2.49E-09 |
| 1700 | OTOP3 | -3.538477228 | 2.715464156 | 7.83E-06 | 0.00034271 |
| 1701 | COL15A1 | -3.563223452 | 2.827848042 | 1.61E-06 | 9.87E-05 |
| 1702 | CXCL13 | -3.588929922 | 3.632760706 | 9.87E-11 | 1.95E-08 |
| 1703 | CDSN | -3.608115774 | 2.876887326 | 5.62E-07 | 4.03E-05 |
| 1704 | SBSN | -3.616262006 | 7.201868344 | 3.04E-15 | 1.85E-12 |
| 1705 | PLK1 | -3.622212096 | 4.957352502 | 2.99E-16 | 3.03E-13 |
| 1706 | SPRR2A | -3.651172304 | 10.21715559 | 1.04E-12 | 3.17E-10 |
| 1707 | COL4A1 | -3.666636779 | 2.97011695 | 1.07E-07 | 9.18E-06 |
| 1708 | SPINK6 | -3.689729466 | 2.913519155 | 3.25E-07 | 2.50E-05 |
| 1709 | TGM1 | -3.719640928 | 5.997317225 | 8.67E-18 | 1.59E-14 |
| 1710 | CCNA2 | -3.730551233 | 4.23460392 | 1.99E-14 | 8.65E-12 |
| 1711 | ACKR1 | -3.73169705 | 2.667157489 | 8.71E-06 | 0.000375779 |
| 1712 | SPRR2D | -3.733465077 | 8.696006242 | 2.96E-15 | 1.85E-12 |
| 1713 | SPRR1B | -3.74343915 | 10.24385702 | 1.67E-14 | 7.68E-12 |
| 1714 | RRM2 | -3.749881546 | 5.194866518 | 2.76E-17 | 3.81E-14 |
| 1715 | SPRR2E | -3.776071898 | 8.845490282 | 4.90E-15 | 2.66E-12 |
| 1716 | KRTDAP | -3.778505124 | 5.830022047 | 6.21E-19 | 1.65E-15 |
| 1717 | AURKB | -3.785851254 | 4.592768949 | 2.56E-15 | 1.69E-12 |
| 1718 | SPRR2F | -3.786438391 | 6.323191196 | 4.44E-15 | 2.49E-12 |
| 1719 | S100A2 | -3.845567611 | 11.53019094 | 4.42E-14 | 1.72E-11 |
| 1720 | CALB1 | -3.867709463 | 4.047519846 | 7.45E-14 | 2.69E-11 |
| 1721 | MYBL2 | -3.892324539 | 4.589760983 | 2.52E-16 | 2.73E-13 |
| 1722 | BIRC5 | -3.921008069 | 4.732098357 | 1.53E-16 | 1.78E-13 |
| 1723 | KRT6B | -3.948215584 | 7.677582843 | 1.98E-17 | 3.01E-14 |
| 1724 | KRT17 | -4.025512663 | 10.67654777 | 5.64E-16 | 4.51E-13 |
| 1725 | SPRR2C | -4.06999709 | 5.331753605 | 3.66E-19 | 1.39E-15 |
| 1726 | KRT6A | -4.084346455 | 11.52893662 | 9.77E-16 | 7.06E-13 |
| 1727 | FGFBP1 | -4.197825764 | 8.070588076 | 6.53E-19 | 1.65E-15 |
| 1728 | PKMYT1 | -4.338391519 | 4.525184222 | 9.44E-18 | 1.59E-14 |
| 1729 | KRT16 | -4.492022612 | 9.02642715 | 9.13E-19 | 1.98E-15 |
| 1730 | IVL | -4.552841569 | 5.605917173 | 2.82E-23 | 1.43E-19 |
| 1731 | IGFBP6 | -4.881223909 | 5.900602574 | 2.86E-25 | 4.34E-21 |
| 1732 | S100A7A | -5.057765198 | 3.05171526 | 9.11E-11 | 1.84E-08 |
| 1733 | H19 | -5.285395498 | 3.919223472 | 4.52E-16 | 4.03E-13 |
| 1734 | CCL19 | -5.316999388 | 3.39137213 | 6.15E-12 | 1.58E-09 |
| 1735 | KRT14 | -5.534561948 | 11.28250123 | 2.68E-23 | 1.43E-19 |
| 1736 | SNORA63 | -6.257618538 | 3.507588394 | 1.41E-14 | 6.69E-12 |

**Supplementary Table 3. Differentially methylated region between patients with AERD and ATA**

|  | **CpG** | **Gene** | **Chromosome** | **Position** | **deltaBeta** | ***P* value** | **Adjusted *P* value** |
| --- | --- | --- | --- | --- | --- | --- | --- |
| 1 | cg00629688 | GRIA4 | 11 | 105479843 | 0.086003875 | 1.23E-06 | 0.351773702 |
| 2 | cg07607639 | ITPRIPL2 | 16 | 19130141 | 0.163425466 | 2.38E-06 | 0.351773702 |
| 3 | cg26561943 | PALM | 19 | 719632 | 0.107998199 | 2.65E-06 | 0.351773702 |
| 4 | cg08600197 | LRRC4B | 19 | 51056945 | 0.099662281 | 2.98E-06 | 0.351773702 |
| 5 | cg09191731 | HS3ST2 | 16 | 22825046 | 0.078160966 | 3.64E-06 | 0.351773702 |
| 6 | cg03548123 |  | 19 | 1672090 | 0.134927356 | 3.92E-06 | 0.351773702 |
| 7 | cg17907385 | MRPL16 | 11 | 59578675 | 0.135776273 | 4.85E-06 | 0.351773702 |
| 8 | cg16087412 | KCNJ12 | 17 | 21281017 | 0.083463592 | 5.44E-06 | 0.351773702 |
| 9 | cg06054552 | SPTBN4 | 19 | 41060564 | 0.079161413 | 5.47E-06 | 0.351773702 |
| 10 | cg25864633 | RASGRP1 | 15 | 38857528 | 0.112238626 | 5.77E-06 | 0.351773702 |
| 11 | cg23235141 |  | X | 102881084 | 0.143196113 | 6.79E-06 | 0.351773702 |
| 12 | cg08586737 | GCC1 | 7 | 127225949 | 0.0968753 | 8.31E-06 | 0.351773702 |
| 13 | cg18108653 | CAPZA1 | 1 | 113178152 | 0.118390888 | 8.45E-06 | 0.351773702 |
| 14 | cg26621748 | C11orf63 | 11 | 122753109 | 0.100435567 | 8.57E-06 | 0.351773702 |
| 15 | cg16245593 | HDAC9 | 7 | 18329669 | 0.070447957 | 8.98E-06 | 0.351773702 |
| 16 | cg22581244 |  | X | 122914034 | 0.066160392 | 9.26E-06 | 0.351773702 |
| 17 | cg14538055 | RAB1B | 11 | 66035834 | 0.079106331 | 9.31E-06 | 0.351773702 |
| 18 | cg24879800 | LOC100129636 | 6 | 29040049 | 0.061469786 | 9.53E-06 | 0.351773702 |
| 19 | cg21079113 | SYPL2 | 1 | 110010089 | 0.050671031 | 9.99E-06 | 0.351773702 |
| 20 | cg19318923 | RAB40B | 17 | 80657252 | 0.059508756 | 1.03E-05 | 0.351773702 |
| 21 | cg15834388 | NECAB1 | 8 | 91803692 | 0.067767247 | 1.03E-05 | 0.351773702 |
| 22 | cg02932204 | PDZD7 | 10 | 102773013 | 0.139007574 | 1.04E-05 | 0.351773702 |
| 23 | cg04856292 | NKAIN2 | 6 | 124124620 | 0.046930395 | 1.20E-05 | 0.359501842 |
| 24 | cg21732460 |  | X | 68151493 | 0.13934868 | 1.23E-05 | 0.359501842 |
| 25 | cg08117436 |  | 1 | 93293756 | 0.06929472 | 1.36E-05 | 0.359501842 |
| 26 | cg14020740 |  | 7 | 10676720 | 0.12290091 | 1.37E-05 | 0.359501842 |
| 27 | cg16771702 | TBL1X | X | 9534558 | 0.231061876 | 1.41E-05 | 0.359501842 |
| 28 | cg05941631 |  | 2 | 46521469 | 0.067477352 | 1.44E-05 | 0.359501842 |
| 29 | cg07099000 | TBCD | 17 | 80841134 | 0.176893774 | 1.45E-05 | 0.359501842 |
| 30 | cg11256186 | HIVEP3 | 1 | 42288825 | 0.180928199 | 1.45E-05 | 0.359501842 |
| 31 | cg27201627 | CDH22 | 20 | 44866035 | 0.063839327 | 1.61E-05 | 0.371803174 |
| 32 | cg09370496 | MED13L | 12 | 116619589 | 0.14621631 | 1.65E-05 | 0.371803174 |
| 33 | cg24717061 |  | 10 | 102978443 | 0.065744348 | 1.77E-05 | 0.371803174 |
| 34 | cg13355312 | NSL1 | 1 | 212904750 | 0.078828458 | 1.78E-05 | 0.371803174 |
| 35 | cg22924867 | SGCE | 7 | 94286834 | 0.062594455 | 1.82E-05 | 0.371803174 |
| 36 | cg03547797 | GAS2 | 11 | 22689644 | 0.140350561 | 1.85E-05 | 0.371803174 |
| 37 | cg09182996 | PANK4 | 1 | 2443284 | 0.058709193 | 1.85E-05 | 0.371803174 |
| 38 | cg12698064 | CDX4 | X | 72666943 | 0.090563459 | 1.91E-05 | 0.372778611 |
| 39 | cg06974930 |  | 1 | 46633153 | 0.078001578 | 2.23E-05 | 0.398273595 |
| 40 | cg06499171 | TRMT2A | 22 | 20100731 | 0.0414619 | 2.29E-05 | 0.398273595 |
| 41 | cg10119132 |  | 5 | 86397446 | 0.098171889 | 2.30E-05 | 0.398273595 |
| 42 | cg27426127 | ABCC10 | 6 | 43394925 | 0.105040914 | 2.32E-05 | 0.398273595 |
| 43 | cg07060913 |  | 16 | 86537142 | 0.066689782 | 2.32E-05 | 0.398273595 |
| 44 | cg14594362 | GRIN2D | 19 | 48947631 | 0.085917029 | 2.39E-05 | 0.398273595 |
| 45 | cg05225311 | BEGAIN | 14 | 101034895 | 0.054540438 | 2.41E-05 | 0.398273595 |
| 46 | cg16334869 |  | 7 | 6698992 | 0.086157333 | 2.47E-05 | 0.398923711 |
| 47 | cg01357370 | NTRK1 | 1 | 156818961 | 0.101327625 | 2.70E-05 | 0.426835267 |
| 48 | cg10193107 |  | 7 | 75924270 | 0.155230504 | 2.83E-05 | 0.438529814 |
| 49 | cg18073906 | SEMA5B | 3 | 122641029 | 0.127338925 | 2.98E-05 | 0.442057754 |
| 50 | cg17994896 | L1CAM | X | 153141500 | 0.095445771 | 2.98E-05 | 0.442057754 |
| 51 | cg17574739 | SYCN | 19 | 39694993 | 0.124366929 | 3.05E-05 | 0.442057754 |
| 52 | cg17746819 | DBT | 1 | 100715586 | 0.056092478 | 3.14E-05 | 0.442057754 |
| 53 | cg01020987 | C1orf174 | 1 | 3816166 | 0.078089308 | 3.18E-05 | 0.442057754 |
| 54 | cg20742865 | LRP1 | 12 | 57539820 | 0.093137931 | 3.21E-05 | 0.442057754 |
| 55 | cg25435270 | FBXO30 | 6 | 146136104 | 0.056512217 | 3.32E-05 | 0.447994281 |
| 56 | cg17826344 | SHANK1 | 19 | 51169660 | 0.045344353 | 3.39E-05 | 0.448170836 |
| 57 | cg20393549 | SSX5 | X | 48049616 | 0.188080556 | 3.44E-05 | 0.448170836 |
| 58 | cg11072637 | TPST1 | 7 | 65773051 | 0.169251654 | 3.62E-05 | 0.457170036 |
| 59 | cg25882572 | COX10 | 17 | 14105123 | 0.217790832 | 3.74E-05 | 0.457170036 |
| 60 | cg13927228 | C9orf171 | 9 | 135285960 | 0.075274743 | 3.75E-05 | 0.457170036 |
| 61 | cg16723556 | XXYLT1 | 3 | 194981558 | 0.081530346 | 3.76E-05 | 0.457170036 |
| 62 | cg17082634 | TYRO3 | 15 | 41850503 | 0.074961799 | 3.83E-05 | 0.45836625 |
| 63 | cg01402735 | ELTD1 | 1 | 79472558 | 0.082550643 | 4.06E-05 | 0.478838751 |
| 64 | cg05108737 | ARMC4 | 10 | 28288291 | 0.080950736 | 4.19E-05 | 0.479170684 |
| 65 | cg01663563 | CIB1 | 15 | 90775513 | 0.079450081 | 4.28E-05 | 0.479170684 |
| 66 | cg27212232 | DOK5 | 20 | 53091600 | 0.110640492 | 4.30E-05 | 0.479170684 |
| 67 | cg08243849 | PUM1 | 1 | 31539007 | 0.054461784 | 4.59E-05 | 0.479170684 |
| 68 | cg25207127 | CHAT | 10 | 50821989 | 0.099078001 | 4.69E-05 | 0.479170684 |
| 69 | cg22081003 |  | 1 | 55416790 | 0.105411217 | 4.80E-05 | 0.479170684 |
| 70 | cg15270241 |  | 7 | 30785273 | 0.079346534 | 4.81E-05 | 0.479170684 |
| 71 | cg18552113 | TRIP4 | 15 | 64740162 | 0.051020814 | 4.87E-05 | 0.479170684 |
| 72 | cg10404749 | DMC1 | 22 | 38965841 | 0.102812457 | 4.98E-05 | 0.479170684 |
| 73 | cg07903237 |  | 1 | 221064388 | 0.121450439 | 5.02E-05 | 0.479170684 |
| 74 | cg25763788 | HTR1B | 6 | 78172950 | 0.050737081 | 5.07E-05 | 0.479170684 |
| 75 | cg04294285 | ZFAND1 | 8 | 82620994 | 0.086399215 | 5.08E-05 | 0.479170684 |
| 76 | cg06371478 | CDH16 | 16 | 66954273 | 0.160568145 | 5.15E-05 | 0.479170684 |
| 77 | cg16890796 | SLC17A7 | 19 | 49937087 | 0.076014834 | 5.36E-05 | 0.479170684 |
| 78 | cg04565008 | ACY3 | 11 | 67418140 | 0.1262121 | 5.38E-05 | 0.479170684 |
| 79 | cg00521653 | SIRPA | 20 | 1887524 | 0.064809257 | 5.40E-05 | 0.479170684 |
| 80 | cg02469035 | B4GALNT1 | 12 | 58027191 | 0.034573942 | 5.41E-05 | 0.479170684 |
| 81 | cg15783933 | APTX | 9 | 33002679 | 0.125059872 | 5.42E-05 | 0.479170684 |
| 82 | cg15959849 |  | 12 | 69186883 | 0.142150045 | 5.49E-05 | 0.479170684 |
| 83 | cg12010476 |  | 13 | 112628711 | 0.131112009 | 5.58E-05 | 0.479170684 |
| 84 | cg01403005 | IQGAP1 | 15 | 90958170 | -0.293278999 | 5.67E-05 | 0.479170684 |
| 85 | cg06127555 |  | 16 | 14766140 | 0.063380602 | 5.70E-05 | 0.479170684 |
| 86 | cg04687190 | CAMK1D | 10 | 12508841 | 0.225743315 | 5.81E-05 | 0.479170684 |
| 87 | cg08254359 |  | 12 | 54398518 | 0.122273621 | 5.85E-05 | 0.479170684 |
| 88 | cg15157403 |  | 1 | 234880737 | 0.080798724 | 5.86E-05 | 0.479170684 |
| 89 | cg00802237 | SERPINA1 | 14 | 94858066 | 0.145959327 | 5.90E-05 | 0.479170684 |
| 90 | cg13881637 | KCNK4 | 11 | 64064727 | 0.080230227 | 5.92E-05 | 0.479170684 |
| 91 | cg14792480 | CDH16 | 16 | 66954257 | 0.123347279 | 5.98E-05 | 0.479170684 |
| 92 | cg10934589 |  | 1 | 1979149 | 0.075737194 | 5.99E-05 | 0.479170684 |
| 93 | cg26310256 | EGFL6 | X | 13588301 | 0.175029252 | 6.00E-05 | 0.479170684 |
| 94 | cg03837903 | GNAS | 20 | 57464000 | 0.063671362 | 6.20E-05 | 0.490160462 |
| 95 | cg02250400 | GPR124 | 8 | 37698620 | 0.077091544 | 6.28E-05 | 0.490695022 |
| 96 | cg14012310 |  | 13 | 79181947 | 0.090323605 | 6.47E-05 | 0.495065451 |
| 97 | cg12012524 | CIRBP | 19 | 1268008 | 0.104263648 | 6.64E-05 | 0.495065451 |
| 98 | cg01263575 |  | 16 | 27792280 | 0.053397714 | 6.68E-05 | 0.495065451 |
| 99 | cg00020405 | SFRS12 | 5 | 65439520 | 0.085651071 | 6.71E-05 | 0.495065451 |
| 100 | cg26326160 |  | 20 | 41921081 | 0.087364242 | 6.82E-05 | 0.495065451 |
| 101 | cg14601492 | SERPINA1 | 14 | 94858226 | 0.15972035 | 6.83E-05 | 0.495065451 |
| 102 | cg22529396 | MYO7B | 2 | 128293186 | 0.076390828 | 6.88E-05 | 0.495065451 |
| 103 | cg07380641 | B4GALT5 | 20 | 48295033 | 0.167193324 | 6.93E-05 | 0.495065451 |
| 104 | cg03716227 | TTC39A | 1 | 51810983 | 0.067401384 | 6.95E-05 | 0.495065451 |
| 105 | cg25669101 |  | 2 | 183735127 | 0.073929475 | 7.00E-05 | 0.495065451 |
| 106 | cg03742238 | PHOX2B | 4 | 41748676 | 0.067888918 | 7.33E-05 | 0.495575581 |
| 107 | cg04846156 | NFKBIL2 | 8 | 145668591 | 0.099313426 | 7.34E-05 | 0.495575581 |
| 108 | cg11101926 | ACCN1 | 17 | 32483711 | 0.068651131 | 7.35E-05 | 0.495575581 |
| 109 | cg05089465 |  | 3 | 3708128 | 0.127986644 | 7.42E-05 | 0.495575581 |
| 110 | cg00054771 |  | 2 | 175202397 | 0.073539921 | 7.47E-05 | 0.495575581 |
| 111 | cg25659364 | LOC101928304 | 6 | 134851388 | 0.192840277 | 7.53E-05 | 0.495575581 |
| 112 | cg08676455 | MYO1C | 17 | 1374948 | 0.043023917 | 7.60E-05 | 0.495575581 |
| 113 | cg25935834 |  | 17 | 36571512 | 0.071952178 | 7.64E-05 | 0.495575581 |
| 114 | cg18432292 |  | 1 | 1003755 | 0.076097329 | 7.75E-05 | 0.495575581 |
| 115 | cg03501596 | PRDX1 | 1 | 45987721 | 0.05155227 | 7.82E-05 | 0.495575581 |
| 116 | cg07561265 |  | 15 | 74432647 | 0.136801211 | 8.04E-05 | 0.495575581 |
| 117 | cg19438860 | CTNND2 | 5 | 11385821 | 0.107535483 | 8.08E-05 | 0.495575581 |
| 118 | cg01111746 | RARG | 12 | 53605391 | 0.082183256 | 8.21E-05 | 0.495575581 |
| 119 | cg05920908 | AHDC1 | 1 | 27895372 | 0.052903986 | 8.31E-05 | 0.495575581 |
| 120 | cg10239410 | SNORA14B | 1 | 235292449 | 0.06129696 | 8.34E-05 | 0.495575581 |
| 121 | cg07367607 | STX2 | 12 | 131314725 | 0.088207183 | 8.41E-05 | 0.495575581 |
| 122 | cg18363810 | LOC101929710 | 5 | 95595421 | 0.047338219 | 8.47E-05 | 0.495575581 |
| 123 | cg01624068 |  | 13 | 113137799 | 0.067589739 | 8.64E-05 | 0.495575581 |
| 124 | cg24392654 | IL6ST | 5 | 55291546 | 0.045205218 | 8.64E-05 | 0.495575581 |
| 125 | cg11330362 |  | X | 129114238 | 0.100034067 | 8.65E-05 | 0.495575581 |
| 126 | cg18596043 | ITPRIPL2 | 16 | 19127172 | 0.164870261 | 8.72E-05 | 0.495575581 |
| 127 | cg26282566 | PCDHA2 | 5 | 140186580 | 0.050628737 | 8.75E-05 | 0.495575581 |
| 128 | cg26164767 | SLC10A5 | 8 | 82608298 | 0.063964336 | 8.81E-05 | 0.495575581 |
| 129 | cg22569765 | ST6GAL1 | 3 | 186664968 | 0.180555331 | 8.89E-05 | 0.495575581 |
| 130 | cg06870728 | FLJ45983 | 10 | 8095363 | 0.046297603 | 8.91E-05 | 0.495575581 |
| 131 | cg14780068 | NAV1 | 1 | 201751846 | 0.079450897 | 8.92E-05 | 0.495575581 |
| 132 | cg21205282 |  | 6 | 170553133 | -0.141864505 | 9.12E-05 | 0.495575581 |
| 133 | cg17959821 | IQSEC2 | X | 53311012 | 0.164778294 | 9.17E-05 | 0.495575581 |
| 134 | cg09614750 |  | X | 129071184 | 0.110051202 | 9.23E-05 | 0.495575581 |
| 135 | cg14207591 |  | X | 135670502 | 0.076068319 | 9.29E-05 | 0.495575581 |
| 136 | cg01026744 | NAP1L5 | 4 | 89619053 | 0.059913335 | 9.30E-05 | 0.495575581 |
| 137 | cg00065942 | DOC2GP | 11 | 67381310 | 0.08364046 | 9.32E-05 | 0.495575581 |
| 138 | cg16862821 | BRD2 | 6 | 32938469 | 0.053207067 | 9.32E-05 | 0.495575581 |
| 139 | cg11563860 | CNTN4 | 3 | 2141937 | 0.091194938 | 9.36E-05 | 0.495575581 |
| 140 | cg13689261 | LRRC3B | 3 | 26663740 | 0.055033681 | 9.38E-05 | 0.495575581 |
| 141 | cg19910601 | LINC01065 | 13 | 53727009 | 0.103058844 | 9.57E-05 | 0.495575581 |
| 142 | cg08331981 | NDUFA13 | 19 | 19626599 | 0.08997948 | 9.77E-05 | 0.495575581 |
| 143 | cg08553963 |  | 12 | 46774439 | 0.06351316 | 9.77E-05 | 0.495575581 |
| 144 | cg15626881 |  | 7 | 33923464 | 0.133182642 | 9.89E-05 | 0.495575581 |
| 145 | cg03494797 | DPY19L4 | 8 | 95731991 | 0.038888522 | 9.94E-05 | 0.495575581 |
| 146 | cg16489881 |  | 15 | 72896757 | 0.072809999 | 9.97E-05 | 0.495575581 |
| 147 | cg16954577 | TNFRSF11A | 18 | 60051870 | 0.147380027 | 0.00010093 | 0.495575581 |
| 148 | cg25316569 | GRIK4 | 11 | 120530952 | 0.06276953 | 0.00010106 | 0.495575581 |
| 149 | cg03117106 | GNB4 | 3 | 179165750 | 0.104326085 | 0.00010145 | 0.495575581 |
| 150 | cg05521619 | MAPK8IP2 | 22 | 51043833 | 0.080453668 | 0.00010157 | 0.495575581 |
| 151 | cg00556407 |  | 8 | 95369439 | 0.064829409 | 0.00010188 | 0.495575581 |
| 152 | cg15721541 |  | 15 | 102037736 | 0.058687211 | 0.00010235 | 0.495575581 |
| 153 | cg06809298 | COX7A2 | 6 | 75953853 | 0.186375202 | 0.00010264 | 0.495575581 |
| 154 | cg20841748 | CNTNAP1 | 17 | 40838078 | 0.087645207 | 0.00010276 | 0.495575581 |
| 155 | cg08029920 | TMEM82 | 1 | 16070753 | 0.04982556 | 0.00010423 | 0.495691981 |
| 156 | cg08496775 | STMN2 | 8 | 80523226 | 0.12351627 | 0.00010465 | 0.495691981 |
| 157 | cg12573482 | GNAS | 20 | 57427030 | 0.066733361 | 0.0001055 | 0.495691981 |
| 158 | cg01279419 |  | 2 | 151165680 | 0.106919726 | 0.00010646 | 0.495691981 |
| 159 | cg21349625 |  | 12 | 113917449 | 0.046812282 | 0.00010664 | 0.495691981 |
| 160 | cg14597908 | GNASAS | 20 | 57414960 | 0.066932669 | 0.00010795 | 0.495691981 |
| 161 | cg21969990 | KIAA1755 | 20 | 36852920 | 0.080872401 | 0.0001083 | 0.495691981 |
| 162 | cg11516291 |  | X | 39194913 | 0.190706777 | 0.00011002 | 0.495691981 |
| 163 | cg11584613 |  | 7 | 142336126 | 0.063472218 | 0.00011111 | 0.495691981 |
| 164 | cg16826960 | SELV | 19 | 40005351 | 0.117298389 | 0.00011143 | 0.495691981 |
| 165 | cg15654143 | CCDC166 | 8 | 144790102 | 0.102621318 | 0.00011224 | 0.495691981 |
| 166 | cg15373285 | MEG3 | 14 | 101293090 | 0.050464375 | 0.0001153 | 0.495691981 |
| 167 | cg14565721 | RASGRP4 | 19 | 38916488 | 0.056440298 | 0.00011542 | 0.495691981 |
| 168 | cg08553913 | LASP1 | 17 | 37028977 | 0.071934366 | 0.00011622 | 0.495691981 |
| 169 | cg01217608 | CCNY | 10 | 35556411 | 0.121353836 | 0.00011793 | 0.495691981 |
| 170 | cg05605944 | MAOB | X | 43741945 | 0.12290812 | 0.00011912 | 0.495691981 |
| 171 | cg05052450 |  | 3 | 147140118 | 0.045992048 | 0.0001194 | 0.495691981 |
| 172 | cg22809229 | GNRHR2 | 1 | 145515365 | 0.118151887 | 0.0001195 | 0.495691981 |
| 173 | cg08750806 | CERS6 | 2 | 169594717 | 0.068859145 | 0.00012101 | 0.495691981 |
| 174 | cg00350199 | ACY3 | 11 | 67418213 | 0.121113809 | 0.0001212 | 0.495691981 |
| 175 | cg07903153 | SEPHS2 | 16 | 30456827 | 0.050929884 | 0.00012216 | 0.495691981 |
| 176 | cg06427502 | NAP1L4 | 11 | 3012800 | 0.048362636 | 0.00012526 | 0.495691981 |
| 177 | cg25226066 | VAPA | 18 | 9925588 | 0.133144121 | 0.00012596 | 0.495691981 |
| 178 | cg14124980 | RBM4 | 11 | 66405450 | 0.093836331 | 0.0001264 | 0.495691981 |
| 179 | cg08067617 | F2RL3 | 19 | 16999641 | 0.075578452 | 0.00012641 | 0.495691981 |
| 180 | cg06242719 | MIR183 | 7 | 129414860 | 0.081381644 | 0.00012697 | 0.495691981 |
| 181 | cg10302336 | DLEU2L | 1 | 64014601 | 0.066610305 | 0.00012717 | 0.495691981 |
| 182 | cg05941864 | EPHA8 | 1 | 22893978 | 0.126023953 | 0.00012727 | 0.495691981 |
| 183 | cg13870080 |  | 11 | 19303281 | 0.087079725 | 0.00012746 | 0.495691981 |
| 184 | cg11224062 | CCDC163P | 1 | 45963190 | 0.045134807 | 0.00012794 | 0.495691981 |
| 185 | cg00757414 | TPST1 | 7 | 65669728 | 0.049864526 | 0.00012893 | 0.495691981 |
| 186 | cg01127586 | LOC92249 | X | 62780937 | 0.159390971 | 0.00013097 | 0.495691981 |
| 187 | cg23787029 |  | 4 | 156504513 | 0.075617154 | 0.0001311 | 0.495691981 |
| 188 | cg17943107 | 03-Mar | 5 | 126250722 | 0.107437758 | 0.00013302 | 0.495691981 |
| 189 | cg23752086 | PDE3A | 12 | 20522177 | 0.059383042 | 0.0001333 | 0.495691981 |
| 190 | cg18564053 | HES3 | 1 | 6303793 | 0.05422408 | 0.00013388 | 0.495691981 |
| 191 | cg17499729 |  | 21 | 37504755 | 0.068903024 | 0.00013491 | 0.495691981 |
| 192 | cg25015779 | A4GALT | 22 | 43093122 | 0.066871047 | 0.00013524 | 0.495691981 |
| 193 | cg22950598 | GDF11 | 12 | 56139862 | 0.096794863 | 0.00013557 | 0.495691981 |
| 194 | cg19903766 | ATP4A | 19 | 36049672 | 0.135147134 | 0.00013592 | 0.495691981 |
| 195 | cg21210376 | PBK | 8 | 27695667 | 0.069302652 | 0.00013754 | 0.495691981 |
| 196 | cg06408533 | STARD8 | X | 67867352 | 0.100221422 | 0.00013772 | 0.495691981 |
| 197 | cg08659487 |  | 6 | 168386798 | 0.03332699 | 0.00013869 | 0.495691981 |
| 198 | cg05965029 | NDUFB4 | 3 | 120315182 | 0.068083822 | 0.00014093 | 0.495691981 |
| 199 | cg08843859 | C1orf21 | 1 | 184566345 | 0.189257709 | 0.00014147 | 0.495691981 |
| 200 | cg23819069 | GSG1L | 16 | 27904296 | 0.156004899 | 0.0001422 | 0.495691981 |
| 201 | cg08689932 | KCNJ18 | 17 | 21308156 | 0.052980071 | 0.00014273 | 0.495691981 |
| 202 | cg06525046 |  | 2 | 121155673 | 0.113931199 | 0.00014301 | 0.495691981 |
| 203 | cg09155776 | HDAC4 | 2 | 239984105 | 0.127315212 | 0.00014321 | 0.495691981 |
| 204 | cg05208572 | ESPNP | 1 | 17027941 | 0.066711699 | 0.00014324 | 0.495691981 |
| 205 | cg14315054 |  | 1 | 221068730 | 0.154321288 | 0.00014364 | 0.495691981 |
| 206 | cg14658867 | TBC1D20 | 20 | 443632 | 0.070651456 | 0.00014428 | 0.495691981 |
| 207 | cg07536102 | GALR2 | 17 | 74073527 | 0.076304624 | 0.00014473 | 0.495691981 |
| 208 | cg11588197 | ETS1 | 11 | 128391494 | 0.121810736 | 0.00014632 | 0.495691981 |
| 209 | cg27251126 | LOC729020 | 10 | 105004470 | 0.062671293 | 0.0001465 | 0.495691981 |
| 210 | cg10139742 | GNAO1 | 16 | 56352151 | 0.059826873 | 0.00014706 | 0.495691981 |
| 211 | cg08448725 | TOX3 | 16 | 52582210 | 0.175164558 | 0.0001478 | 0.495691981 |
| 212 | cg16342993 | CHRM2 | 7 | 136553787 | 0.041146896 | 0.00014798 | 0.495691981 |
| 213 | cg02925222 | NLRP6 | 11 | 280445 | 0.078024691 | 0.00015052 | 0.495691981 |
| 214 | cg03233793 | NDUFA13 | 19 | 19626605 | 0.109102687 | 0.00015092 | 0.495691981 |
| 215 | cg16690885 | ATP11A | 13 | 113420153 | 0.06548717 | 0.00015145 | 0.495691981 |
| 216 | cg05796475 |  | 3 | 29067859 | 0.144449864 | 0.00015159 | 0.495691981 |
| 217 | cg18414754 | C3orf72 | 3 | 138668832 | 0.059112361 | 0.00015162 | 0.495691981 |
| 218 | cg10092867 | COL9A3 | 20 | 61447394 | 0.087397414 | 0.00015301 | 0.495691981 |
| 219 | cg02478836 | TBC1D22A | 22 | 47510037 | 0.041010832 | 0.00015329 | 0.495691981 |
| 220 | cg10546696 |  | 20 | 61860315 | 0.069996783 | 0.00015555 | 0.495691981 |
| 221 | cg13006749 | C6orf221 | 6 | 74070966 | -0.033102091 | 0.00015734 | 0.495691981 |
| 222 | cg04328567 |  | 1 | 92043869 | 0.117526683 | 0.00015873 | 0.495691981 |
| 223 | cg15362140 |  | 4 | 78743191 | 0.066443065 | 0.00015909 | 0.495691981 |
| 224 | cg09681043 | MYO7B | 2 | 128293239 | 0.097063969 | 0.0001592 | 0.495691981 |
| 225 | cg25115145 |  | 6 | 166240705 | 0.062014857 | 0.00015927 | 0.495691981 |
| 226 | cg25354466 |  | 8 | 65281397 | 0.071841056 | 0.00015948 | 0.495691981 |
| 227 | cg24557058 | CR1L | 1 | 207818493 | 0.05669075 | 0.0001599 | 0.495691981 |
| 228 | cg09283991 | RAB37 | 17 | 72726802 | 0.13758268 | 0.00016207 | 0.495691981 |
| 229 | cg01791104 | PIGV | 1 | 27113753 | 0.039872584 | 0.00016208 | 0.495691981 |
| 230 | cg08502377 | SEC14L1 | 17 | 75209944 | 0.139845533 | 0.00016213 | 0.495691981 |
| 231 | cg05569729 |  | 8 | 36637669 | 0.104376516 | 0.00016221 | 0.495691981 |
| 232 | cg22166739 | UCP2 | 11 | 73694868 | 0.061461765 | 0.00016422 | 0.495691981 |
| 233 | cg21513138 | MUC20 | 3 | 195460818 | 0.090055931 | 0.00016497 | 0.495691981 |
| 234 | cg07108522 | NHSL2 | X | 71238826 | 0.128467416 | 0.00016544 | 0.495691981 |
| 235 | cg10161743 | GRIN2D | 19 | 48917816 | 0.108061604 | 0.00016611 | 0.495691981 |
| 236 | cg20281573 | TRIM36 | 5 | 114516427 | 0.100758395 | 0.00016626 | 0.495691981 |
| 237 | cg19268752 | CLVS2 | 6 | 123316909 | 0.08029009 | 0.00016665 | 0.495691981 |
| 238 | cg24208172 | CDS1 | 4 | 85504879 | 0.02989352 | 0.000167 | 0.495691981 |
| 239 | cg15082071 | MAGED1 | X | 51546021 | 0.149867396 | 0.00016715 | 0.495691981 |
| 240 | cg19892115 | MTERFD2 | 2 | 242029287 | 0.060524871 | 0.00016757 | 0.495691981 |
| 241 | cg06988642 | LINC00963 | 9 | 132274000 | 0.127412889 | 0.00016806 | 0.495691981 |
| 242 | cg01956865 | RAC3 | 17 | 79989929 | 0.048068069 | 0.00016965 | 0.495691981 |
| 243 | cg13072446 | C1orf56 | 1 | 151019727 | 0.038321876 | 0.00016968 | 0.495691981 |
| 244 | cg09832582 | ADRA1B | 5 | 159398860 | 0.09886697 | 0.00017006 | 0.495691981 |
| 245 | cg13401301 |  | 9 | 134132080 | 0.062651855 | 0.0001711 | 0.495691981 |
| 246 | cg19062489 | CYP4F22 | 19 | 15662114 | 0.041757193 | 0.00017203 | 0.495691981 |
| 247 | cg24546349 |  | 10 | 58346379 | 0.094426094 | 0.00017253 | 0.495691981 |
| 248 | cg21671983 | LAMP5 | 20 | 9494766 | 0.068675009 | 0.00017296 | 0.495691981 |
| 249 | cg18486906 | OSBP2 | 22 | 31218227 | 0.072181061 | 0.00017301 | 0.495691981 |
| 250 | cg00413849 | BRP44 | 1 | 167906156 | 0.038323957 | 0.00017328 | 0.495691981 |
| 251 | cg09310185 | BIRC7 | 20 | 61866960 | 0.117300093 | 0.00017463 | 0.495691981 |
| 252 | cg19299215 | SOBP | 6 | 107834314 | 0.169082951 | 0.00017498 | 0.495691981 |
| 253 | cg14708284 | MTMR7 | 8 | 17194355 | 0.16962952 | 0.00017574 | 0.495691981 |
| 254 | cg19144013 | PIR | X | 15511746 | 0.151534782 | 0.00017605 | 0.495691981 |
| 255 | cg19508671 |  | 15 | 52392809 | 0.15556549 | 0.00017662 | 0.495691981 |
| 256 | cg25947600 |  | 19 | 48676053 | 0.096416222 | 0.00017676 | 0.495691981 |
| 257 | cg05056953 | DPF1 | 19 | 38720731 | 0.073324839 | 0.00017774 | 0.495691981 |
| 258 | cg01754037 | C8orf47 | 8 | 99077049 | 0.033451413 | 0.000178 | 0.495691981 |
| 259 | cg11301354 |  | 5 | 133860277 | 0.048781093 | 0.00017858 | 0.495691981 |
| 260 | cg04416981 | CBFA2T3 | 16 | 89043707 | 0.04983901 | 0.00017875 | 0.495691981 |
| 261 | cg18889393 |  | 19 | 6282970 | 0.048923063 | 0.00017876 | 0.495691981 |
| 262 | cg08263708 |  | 6 | 85476373 | 0.083092034 | 0.00017931 | 0.495691981 |
| 263 | cg15721102 | FAM178B | 2 | 97651503 | 0.102901722 | 0.00018094 | 0.495691981 |
| 264 | cg09876847 | LINC01546 | X | 3189641 | 0.168131423 | 0.00018166 | 0.495691981 |
| 265 | cg23133255 | NECAB1 | 8 | 91803670 | 0.084832415 | 0.00018252 | 0.495691981 |
| 266 | cg21406217 | INTS9 | 8 | 28748500 | 0.054882093 | 0.0001839 | 0.495691981 |
| 267 | cg07595290 | IQSEC2 | X | 53292213 | 0.137209758 | 0.00018406 | 0.495691981 |
| 268 | cg23792978 | PDE2A | 11 | 72385698 | 0.083981925 | 0.00018457 | 0.495691981 |
| 269 | cg08519290 |  | 7 | 156700702 | 0.412019389 | 0.00018502 | 0.495691981 |
| 270 | cg01726103 | FAM65B | 6 | 24911615 | 0.046396524 | 0.00018521 | 0.495691981 |
| 271 | cg16605208 | SSPO | 7 | 149473463 | 0.096826005 | 0.00018535 | 0.495691981 |
| 272 | cg05110837 | ADD1 | 4 | 2930306 | 0.067441365 | 0.00018696 | 0.495691981 |
| 273 | cg04369964 | DNAJC4 | 11 | 63997586 | 0.039522429 | 0.00018819 | 0.495691981 |
| 274 | cg00535218 | TCF7L1 | 2 | 85470887 | 0.061021391 | 0.00018865 | 0.495691981 |
| 275 | cg06216293 | RHBG | 1 | 156339250 | 0.04710646 | 0.00018904 | 0.495691981 |
| 276 | cg15543621 | ESR2 | 14 | 64791460 | 0.094504336 | 0.00019055 | 0.495691981 |
| 277 | cg26110898 | PDHB | 3 | 58419937 | 0.042902496 | 0.00019078 | 0.495691981 |
| 278 | cg12069547 |  | 1 | 178614088 | 0.190216626 | 0.00019154 | 0.495691981 |
| 279 | cg07191348 | TPSG1 | 16 | 1273783 | 0.072323497 | 0.00019179 | 0.495691981 |
| 280 | cg06297350 | LOC101929680 | 2 | 167038158 | 0.032551761 | 0.00019182 | 0.495691981 |
| 281 | cg05153729 | POR | 7 | 75614406 | 0.046124338 | 0.00019226 | 0.495691981 |
| 282 | cg13460751 |  | 3 | 11006482 | 0.051886546 | 0.00019242 | 0.495691981 |
| 283 | cg25920229 | PGBD4 | 15 | 34393597 | 0.03134693 | 0.00019281 | 0.495691981 |
| 284 | cg04764584 | SLC9A3 | 5 | 505985 | 0.105885346 | 0.00019342 | 0.495691981 |
| 285 | cg15152894 | GDF6 | 8 | 97174226 | 0.101722996 | 0.0001936 | 0.495691981 |
| 286 | cg16512458 | TMEM63A | 1 | 226069078 | 0.061379301 | 0.0001945 | 0.495691981 |
| 287 | cg03012544 | NEFM | 8 | 24773268 | 0.085986628 | 0.00019457 | 0.495691981 |
| 288 | cg00377653 | GLS2 | 12 | 56882535 | 0.143599054 | 0.00019516 | 0.495691981 |
| 289 | cg03392041 |  | 18 | 60766289 | 0.166923689 | 0.00019616 | 0.495691981 |
| 290 | cg02540078 |  | 22 | 22785852 | 0.073097816 | 0.00019652 | 0.495691981 |
| 291 | cg06533408 | SLC35E3 | 12 | 69139618 | 0.079682008 | 0.00019721 | 0.495691981 |
| 292 | cg23492625 |  | 7 | 1407363 | 0.121215569 | 0.0001981 | 0.495691981 |
| 293 | cg02107718 | GNAS | 20 | 57463713 | 0.066085015 | 0.00019823 | 0.495691981 |
| 294 | cg18139769 | SGCE | 7 | 94286955 | 0.058756314 | 0.00019851 | 0.495691981 |
| 295 | cg11256374 | USP19 | 3 | 49158514 | 0.055533717 | 0.00019889 | 0.495691981 |
| 296 | cg20940180 |  | 18 | 55594848 | 0.10723805 | 0.00019911 | 0.495691981 |
| 297 | cg08935887 |  | 2 | 174658976 | 0.103135617 | 0.00020018 | 0.495691981 |
| 298 | cg02137495 | LOC728606 | 18 | 24283375 | 0.149438871 | 0.00020042 | 0.495691981 |
| 299 | cg26496204 | GNAS | 20 | 57427210 | 0.048032898 | 0.00020097 | 0.495691981 |
| 300 | cg24184634 | IL12A-AS1 | 3 | 159721504 | 0.076505367 | 0.00020107 | 0.495691981 |
| 301 | cg21364566 | SLC30A7 | 1 | 101415648 | 0.068128561 | 0.0002028 | 0.495691981 |
| 302 | cg24527003 | LOC100505942 | 16 | 67559441 | 0.087564907 | 0.00020298 | 0.495691981 |
| 303 | cg05798429 | C6orf27 | 6 | 31743928 | 0.091433303 | 0.00020368 | 0.495691981 |
| 304 | cg26809338 |  | 19 | 17961371 | 0.059768296 | 0.00020433 | 0.495691981 |
| 305 | cg14827294 | ASPDH | 19 | 51018155 | 0.078390877 | 0.00020453 | 0.495691981 |
| 306 | cg00153306 | TMIE | 3 | 46741492 | 0.094874097 | 0.00020471 | 0.495691981 |
| 307 | cg02937357 | COL4A5 | X | 107682746 | 0.159109691 | 0.00020591 | 0.495691981 |
| 308 | cg15442702 | FGFR4 | 5 | 176514253 | 0.029898616 | 0.00020692 | 0.495691981 |
| 309 | cg26997085 | SGCE | 7 | 94286110 | 0.063447665 | 0.00020697 | 0.495691981 |
| 310 | cg26246434 | ATP6AP2 | X | 40439306 | 0.095219305 | 0.00020783 | 0.495691981 |
| 311 | cg17857235 | LOC285696 | 5 | 17213797 | 0.083392077 | 0.00020837 | 0.495691981 |
| 312 | cg12484590 |  | 1 | 156475177 | 0.047758349 | 0.00021085 | 0.495691981 |
| 313 | cg26893787 | FUT6 | 19 | 5838760 | 0.110509692 | 0.00021256 | 0.495691981 |
| 314 | cg12569736 | KCNK9 | 8 | 140643235 | 0.06739697 | 0.00021284 | 0.495691981 |
| 315 | cg10033892 |  | 10 | 134736108 | 0.060016045 | 0.00021306 | 0.495691981 |
| 316 | cg11302624 | RGS14 | 5 | 176788169 | 0.135056322 | 0.00021337 | 0.495691981 |
| 317 | cg25949363 | TMEM92 | 17 | 48352008 | 0.059545976 | 0.00021357 | 0.495691981 |
| 318 | cg01624761 |  | 20 | 33267208 | 0.094826317 | 0.00021379 | 0.495691981 |
| 319 | cg05832051 | MYADM | 19 | 54369469 | 0.050504293 | 0.00021409 | 0.495691981 |
| 320 | cg22504024 | CUX2 | 12 | 111710593 | 0.10902019 | 0.0002147 | 0.495691981 |
| 321 | cg12343423 | DRICH1 | 22 | 23974832 | 0.113485918 | 0.0002151 | 0.495691981 |
| 322 | cg06884882 | C1orf228 | 1 | 45187946 | 0.030105984 | 0.00021561 | 0.495691981 |
| 323 | cg06574159 | TSSC4 | 11 | 2420968 | 0.119568098 | 0.00021621 | 0.495691981 |
| 324 | cg20160216 |  | X | 152060446 | 0.128191774 | 0.00021626 | 0.495691981 |
| 325 | cg05864876 | NLRP6 | 11 | 281699 | 0.093780244 | 0.00021768 | 0.496244209 |
| 326 | cg07933020 | PCDHGC4 | 5 | 140863492 | 0.154767354 | 0.00021903 | 0.496244209 |
| 327 | cg06453301 | PLS1 | 3 | 142376609 | 0.160727614 | 0.00022082 | 0.496244209 |
| 328 | cg08114265 | FYN | 6 | 112052356 | 0.072389023 | 0.00022273 | 0.496244209 |
| 329 | cg22520850 | CUX2 | 12 | 111531339 | 0.06070962 | 0.00022288 | 0.496244209 |
| 330 | cg06959541 | POMGNT1 | 1 | 46658068 | 0.105273877 | 0.00022523 | 0.496244209 |
| 331 | cg16426779 | ITPRIPL2 | 16 | 19127208 | 0.124514602 | 0.00022538 | 0.496244209 |
| 332 | cg21771834 | SGCE | 7 | 94286263 | 0.048710845 | 0.0002257 | 0.496244209 |
| 333 | cg12018623 | RPS24 | 10 | 79801279 | 0.056002711 | 0.00022652 | 0.496244209 |
| 334 | cg09441579 | SEMA5A | 5 | 9066649 | 0.058746266 | 0.00022751 | 0.496244209 |
| 335 | cg11488168 | PCDHA9 | 5 | 140226860 | 0.120425134 | 0.00022859 | 0.496244209 |
| 336 | cg18793814 | GPR112 | X | 135382458 | 0.090675375 | 0.00022861 | 0.496244209 |
| 337 | cg25568061 |  | 2 | 71291953 | 0.126732764 | 0.00022953 | 0.496244209 |
| 338 | cg14576825 |  | 19 | 1676136 | 0.116917681 | 0.00023042 | 0.496244209 |
| 339 | cg16236314 | GPC3 | X | 132911882 | 0.164465587 | 0.00023101 | 0.496244209 |
| 340 | cg16315334 | REEP4 | 8 | 21996639 | 0.075085053 | 0.00023226 | 0.496244209 |
| 341 | cg07197800 | UBXN7 | 3 | 196120672 | 0.0666886 | 0.00023271 | 0.496244209 |
| 342 | cg24646067 |  | 5 | 87812057 | 0.108861698 | 0.00023603 | 0.496244209 |
| 343 | cg15084122 |  | 14 | 71756489 | 0.110125374 | 0.00023667 | 0.496244209 |
| 344 | cg04457481 | GNAS | 20 | 57426835 | 0.054505173 | 0.00023957 | 0.496244209 |
| 345 | cg02205602 |  | 4 | 78416086 | 0.092400635 | 0.00023982 | 0.496244209 |
| 346 | cg00867694 | CCDC88C | 14 | 91884854 | 0.065650749 | 0.00024093 | 0.496244209 |
| 347 | cg21276772 |  | 11 | 64097915 | 0.126470704 | 0.00024099 | 0.496244209 |
| 348 | cg18529251 | LOC90110 | 17 | 37411834 | 0.096017221 | 0.0002412 | 0.496244209 |
| 349 | cg25390755 | STRIP1 | 1 | 110573395 | 0.090409915 | 0.00024207 | 0.496244209 |
| 350 | cg20348829 | PDGFRB | 5 | 149535951 | 0.058362428 | 0.00024258 | 0.496244209 |
| 351 | cg07421704 |  | 20 | 48228005 | 0.102855881 | 0.00024482 | 0.496244209 |
| 352 | cg06256281 | GPC4 | X | 132457677 | 0.132885317 | 0.00024544 | 0.496244209 |
| 353 | cg01938018 | NPHS2 | 1 | 179545425 | 0.106290102 | 0.00024701 | 0.496244209 |
| 354 | cg14128911 | NMRK2 | 19 | 3934407 | 0.134670195 | 0.00024701 | 0.496244209 |
| 355 | cg10619379 | PHF12 | 17 | 27252884 | 0.157188518 | 0.00024731 | 0.496244209 |
| 356 | cg22906486 | ADAMTS2 | 5 | 178773355 | 0.092713751 | 0.00024775 | 0.496244209 |
| 357 | cg22736807 |  | 5 | 92938149 | 0.093536449 | 0.0002494 | 0.496244209 |
| 358 | cg26946277 |  | 17 | 57394467 | 0.109625448 | 0.0002506 | 0.496244209 |
| 359 | cg20377999 |  | 15 | 62538159 | 0.061723215 | 0.00025103 | 0.496244209 |
| 360 | cg22706629 | PTPLAD1 | 15 | 65823539 | 0.024972066 | 0.0002511 | 0.496244209 |
| 361 | cg24734254 |  | 1 | 14753722 | 0.124470882 | 0.00025122 | 0.496244209 |
| 362 | cg18871437 |  | 18 | 52284049 | 0.194865392 | 0.00025149 | 0.496244209 |
| 363 | cg11666630 | LINC00649 | 21 | 35322924 | 0.080336491 | 0.00025173 | 0.496244209 |
| 364 | cg06479550 | CALY | 10 | 135139895 | 0.107781639 | 0.00025179 | 0.496244209 |
| 365 | cg12141794 |  | 1 | 25378405 | 0.097851613 | 0.00025209 | 0.496244209 |
| 366 | cg00380860 |  | 3 | 28616404 | 0.096441404 | 0.00025273 | 0.496244209 |
| 367 | cg19515510 | NUP85 | 17 | 73201236 | 0.036647075 | 0.00025508 | 0.496244209 |
| 368 | cg20686408 | MTSS1 | 8 | 125564574 | 0.081217248 | 0.00025554 | 0.496244209 |
| 369 | cg20860915 | TLL2 | 10 | 98162314 | 0.075167174 | 0.00025626 | 0.496244209 |
| 370 | cg08134671 | GNG7 | 19 | 2542837 | 0.109724488 | 0.00025647 | 0.496244209 |
| 371 | cg25372103 | DLL1 | 6 | 170599661 | 0.037470056 | 0.00025662 | 0.496244209 |
| 372 | cg25978835 | NEFL | 8 | 24814496 | 0.032027081 | 0.00025703 | 0.496244209 |
| 373 | cg00382651 | MORF4L2 | X | 102941915 | 0.141880883 | 0.00025703 | 0.496244209 |
| 374 | cg27131176 | C22orf26 | 22 | 46450114 | 0.033552289 | 0.00025766 | 0.496244209 |
| 375 | cg15329149 | HSF1 | 8 | 145532532 | 0.048090414 | 0.00025914 | 0.496244209 |
| 376 | cg11943676 | CST7 | 20 | 24934498 | 0.045807357 | 0.00026016 | 0.496244209 |
| 377 | cg18409562 | NAPRT | 8 | 144657636 | 0.074483936 | 0.00026239 | 0.496244209 |
| 378 | cg02332782 | ZDHHC14 | 6 | 157801523 | 0.056547139 | 0.00026263 | 0.496244209 |
| 379 | cg02726715 | TFDP2 | 3 | 141682743 | 0.06818407 | 0.00026283 | 0.496244209 |
| 380 | cg16551468 | ARMCX2 | X | 100915108 | 0.090521709 | 0.00026287 | 0.496244209 |
| 381 | cg02104962 |  | 6 | 31548314 | 0.086379967 | 0.00026287 | 0.496244209 |
| 382 | cg25896657 | C11orf57 | 11 | 111943943 | 0.105994039 | 0.00026339 | 0.496244209 |
| 383 | cg19903896 | IPCEF1 | 6 | 154579470 | 0.153805223 | 0.00026376 | 0.496244209 |
| 384 | cg10443569 |  | 2 | 137142376 | 0.070992793 | 0.00026423 | 0.496244209 |
| 385 | cg11426563 |  | 7 | 74020802 | 0.045981372 | 0.00026445 | 0.496244209 |
| 386 | cg00795248 | LHX9 | 1 | 197888305 | 0.045147099 | 0.00026552 | 0.496244209 |
| 387 | cg05858130 | PRAF2 | X | 48929808 | 0.107300597 | 0.00026657 | 0.496244209 |
| 388 | cg11522001 |  | 1 | 19122101 | 0.051521513 | 0.00026686 | 0.496244209 |
| 389 | cg27640316 |  | 2 | 217799104 | 0.118784559 | 0.00026689 | 0.496244209 |
| 390 | cg02142098 | DMC1 | 22 | 38965659 | 0.099491154 | 0.00026738 | 0.496244209 |
| 391 | cg00811358 | OSBP2 | 22 | 31219164 | 0.16173121 | 0.00026934 | 0.496244209 |
| 392 | cg00732970 | GNASAS | 20 | 57414162 | 0.055931513 | 0.00027005 | 0.496244209 |
| 393 | cg20968194 | NFATC2 | 20 | 50017103 | 0.084476442 | 0.00027056 | 0.496244209 |
| 394 | cg22837145 |  | 18 | 44924098 | 0.12678372 | 0.00027067 | 0.496244209 |
| 395 | cg22721489 | C19orf12 | 19 | 30207616 | 0.041779107 | 0.00027131 | 0.496244209 |
| 396 | cg16093876 | ZNF169 | 9 | 97021966 | 0.06660773 | 0.00027169 | 0.496244209 |
| 397 | cg26215000 | TFAP2D | 6 | 50683758 | 0.109942902 | 0.00027305 | 0.496244209 |
| 398 | cg20504236 |  | 17 | 72858011 | 0.060228901 | 0.00027402 | 0.496244209 |
| 399 | cg12112234 | TGM4 | 3 | 44955518 | 0.093380716 | 0.00027433 | 0.496244209 |
| 400 | cg01075005 |  | 6 | 42879409 | 0.064705481 | 0.00027441 | 0.496244209 |
| 401 | cg20298936 | MAP3K13 | 3 | 185201120 | 0.064789323 | 0.00027612 | 0.496244209 |
| 402 | cg15625576 | SYN1 | X | 47455184 | 0.211292076 | 0.00027666 | 0.496244209 |
| 403 | cg14236389 | C20orf197 | 20 | 58631038 | 0.078006699 | 0.00027704 | 0.496244209 |
| 404 | cg19921355 | PODNL1 | 19 | 14049093 | 0.097132868 | 0.00027712 | 0.496244209 |
| 405 | cg07792446 | BLVRB | 19 | 40968536 | 0.083910701 | 0.0002775 | 0.496244209 |
| 406 | cg06579875 | FLJ40125 | 19 | 46001962 | 0.047609001 | 0.00027769 | 0.496244209 |
| 407 | cg24181728 | FLNB | 3 | 58060875 | 0.127705904 | 0.00027834 | 0.496244209 |
| 408 | cg20333059 | SKOR1 | 15 | 68112028 | 0.089649644 | 0.00027941 | 0.496244209 |
| 409 | cg11667959 |  | 2 | 71291991 | 0.104696772 | 0.00028012 | 0.496244209 |
| 410 | cg15042888 | TBC1D20 | 20 | 443653 | 0.038033595 | 0.00028029 | 0.496244209 |
| 411 | cg07358876 | CAPN13 | 2 | 30955634 | 0.059354134 | 0.00028125 | 0.496244209 |
| 412 | cg07204800 |  | 2 | 242869193 | 0.085028428 | 0.00028223 | 0.496244209 |
| 413 | cg00161459 | FZD6 | 8 | 104309910 | 0.070395562 | 0.00028225 | 0.496244209 |
| 414 | cg13360866 |  | 1 | 1135492 | 0.112544491 | 0.00028226 | 0.496244209 |
| 415 | cg06191076 | DIRAS3 | 1 | 68516463 | 0.046303358 | 0.00028282 | 0.496244209 |
| 416 | cg00267512 | FANK1 | 10 | 127584250 | 0.04945883 | 0.00028303 | 0.496244209 |
| 417 | cg11850638 | GJB7 | 6 | 88032210 | 0.038727513 | 0.00028327 | 0.496244209 |
| 418 | cg21626163 | MCCC2 | 5 | 70882722 | 0.094344938 | 0.00028414 | 0.496244209 |
| 419 | cg01149317 | AGBL1 | 15 | 86987924 | 0.105497692 | 0.00028416 | 0.496244209 |
| 420 | cg00250092 | GGT7 | 20 | 33461847 | 0.068458603 | 0.00028497 | 0.496244209 |
| 421 | cg19016768 | ARIH2 | 3 | 48990083 | 0.094359174 | 0.00028516 | 0.496244209 |
| 422 | cg22757362 | RASGEF1A | 10 | 43721445 | 0.095781583 | 0.0002852 | 0.496244209 |
| 423 | cg19123967 | AMER1 | X | 63426420 | 0.105624395 | 0.00028542 | 0.496244209 |
| 424 | cg03708951 |  | 14 | 74732304 | 0.105152454 | 0.00028587 | 0.496244209 |
| 425 | cg22441758 | MAP3K6 | 1 | 27685312 | 0.069482184 | 0.00028724 | 0.496244209 |
| 426 | cg05477834 | PCDHB17 | 5 | 140536175 | 0.091985176 | 0.00028792 | 0.496244209 |
| 427 | cg20708711 | FREM2 | 13 | 39261109 | 0.042869691 | 0.00028836 | 0.496244209 |
| 428 | cg01246254 | PLEKHA1 | 10 | 124134882 | 0.052222288 | 0.00028887 | 0.496244209 |
| 429 | cg13773083 | RESP18 | 2 | 220197274 | 0.063005551 | 0.00028948 | 0.496244209 |
| 430 | cg18549946 | TOMM20L | 14 | 58862146 | 0.092327791 | 0.0002903 | 0.496244209 |
| 431 | cg03682823 | SGCE | 7 | 94286953 | 0.060789679 | 0.0002907 | 0.496244209 |
| 432 | cg08134859 | NACA | 12 | 57119720 | 0.055883186 | 0.00029394 | 0.496244209 |
| 433 | cg05170705 | NEURL4 | 17 | 7221987 | 0.042748963 | 0.00029461 | 0.496244209 |
| 434 | cg11841181 |  | 19 | 36423098 | 0.078553393 | 0.00029472 | 0.496244209 |
| 435 | cg20927724 | PLIN1 | 15 | 90209326 | 0.076066762 | 0.0002951 | 0.496244209 |
| 436 | cg20244073 | MID1 | X | 10851627 | 0.081734302 | 0.00029513 | 0.496244209 |
| 437 | cg17500055 | GNG4 | 1 | 235805560 | 0.10027314 | 0.0002953 | 0.496244209 |
| 438 | cg01485645 | MLLT6 | 17 | 36862199 | 0.045920503 | 0.00029553 | 0.496244209 |
| 439 | cg03116148 | ZNF789 | 7 | 99070787 | 0.046846631 | 0.00029595 | 0.496244209 |
| 440 | cg08724109 |  | 7 | 129868786 | 0.089734109 | 0.00029627 | 0.496244209 |
| 441 | cg22543195 |  | 2 | 119068223 | 0.038125794 | 0.00029651 | 0.496244209 |
| 442 | cg03817616 | MTMR8 | X | 63615495 | 0.064571687 | 0.00029714 | 0.496244209 |
| 443 | cg06389706 | SEPT9 | 17 | 75490737 | 0.129023497 | 0.00029802 | 0.496244209 |
| 444 | cg03213216 | RTN2 | 19 | 46001735 | 0.049149941 | 0.00029903 | 0.496244209 |
| 445 | cg24984312 | APOA1 | 11 | 116707209 | 0.084585008 | 0.00029963 | 0.496244209 |
| 446 | cg07301105 | C2orf52 | 2 | 232379665 | 0.087385536 | 0.00030057 | 0.496244209 |
| 447 | cg06148175 | ACY3 | 11 | 67418148 | 0.144385244 | 0.0003018 | 0.496244209 |
| 448 | cg23303369 | MMP9 | 20 | 44641161 | 0.11668219 | 0.00030212 | 0.496244209 |
| 449 | cg11126081 | CALY | 10 | 135141628 | 0.107087839 | 0.00030278 | 0.496244209 |
| 450 | cg19572055 |  | 8 | 685830 | 0.12931194 | 0.00030346 | 0.496244209 |
| 451 | cg01957760 | TOR1AIP2 | 1 | 179847329 | 0.025719527 | 0.00030364 | 0.496244209 |
| 452 | cg03507534 | FAM176B | 1 | 36789937 | 0.145129559 | 0.00030464 | 0.496244209 |
| 453 | cg16172864 |  | 7 | 1716623 | 0.087957553 | 0.00030516 | 0.496244209 |
| 454 | cg18990832 |  | 2 | 46862132 | 0.116841158 | 0.00030721 | 0.496244209 |
| 455 | cg26194514 | UCKL1 | 20 | 62575851 | 0.102029039 | 0.00030766 | 0.496244209 |
| 456 | cg18898992 | SGCE | 7 | 94286484 | 0.059254646 | 0.00030778 | 0.496244209 |
| 457 | cg08457413 |  | X | 107222081 | 0.080304415 | 0.00030804 | 0.496244209 |
| 458 | cg04344875 | MEST | 7 | 130131484 | 0.049624985 | 0.00030851 | 0.496244209 |
| 459 | cg21219903 | HYI | 1 | 43920090 | 0.071748977 | 0.00030947 | 0.496244209 |
| 460 | cg08719572 | MED30 | 8 | 118552170 | 0.150043882 | 0.00031083 | 0.496244209 |
| 461 | cg24324206 |  | 3 | 183914391 | 0.1058808 | 0.00031115 | 0.496244209 |
| 462 | cg17147638 | AGAP1 | 2 | 236509769 | 0.09062314 | 0.00031119 | 0.496244209 |
| 463 | cg07656347 | MDC1 | 6 | 30684837 | 0.057926014 | 0.00031287 | 0.496244209 |
| 464 | cg10433501 | KCNC3 | 19 | 50816886 | 0.095525548 | 0.00031302 | 0.496244209 |
| 465 | cg06091660 |  | 4 | 166282272 | 0.110299747 | 0.00031315 | 0.496244209 |
| 466 | cg16745239 | LTBR | 12 | 6495305 | 0.164928388 | 0.00031371 | 0.496244209 |
| 467 | cg01621576 |  | 22 | 46283142 | 0.061769067 | 0.00031427 | 0.496244209 |
| 468 | cg23750445 | HOXC12 | 12 | 54347938 | 0.086117968 | 0.00031565 | 0.496244209 |
| 469 | cg20558785 | CLIC6 | 21 | 36040412 | 0.071020487 | 0.00031597 | 0.496244209 |
| 470 | cg09929786 |  | 5 | 143229967 | 0.153128333 | 0.0003169 | 0.496244209 |
| 471 | cg27151629 |  | 17 | 19411125 | 0.035145264 | 0.00031733 | 0.496244209 |
| 472 | cg20413441 | NGFR | 17 | 47588046 | 0.051865746 | 0.00031763 | 0.496244209 |
| 473 | cg10439113 | SLC17A6 | 11 | 22360177 | 0.077459488 | 0.00031818 | 0.496244209 |
| 474 | cg05501682 | DKFZP686I15217 | 6 | 2988723 | 0.036975629 | 0.00031833 | 0.496244209 |
| 475 | cg19589727 | GNAS | 20 | 57427762 | 0.047902637 | 0.00031838 | 0.496244209 |
| 476 | cg08672675 | TPH2 | 12 | 72331271 | 0.139178537 | 0.00031865 | 0.496244209 |
| 477 | cg19175928 | SULT1B1 | 4 | 70625781 | 0.200643884 | 0.00031928 | 0.496244209 |
| 478 | cg05160879 |  | 1 | 177322878 | 0.100293311 | 0.0003194 | 0.496244209 |
| 479 | cg25689873 | ARID4B | 1 | 235429880 | 0.069478639 | 0.00032014 | 0.496349306 |
| 480 | cg04978563 | PLCD4 | 2 | 219483469 | 0.04947586 | 0.00032091 | 0.496505793 |
| 481 | cg12663039 | C16orf45 | 16 | 15527960 | 0.097076004 | 0.00032372 | 0.497382859 |
| 482 | cg12048031 | ZNF256 | 19 | 58459283 | 0.027618698 | 0.00032376 | 0.497382859 |
| 483 | cg03575584 |  | 14 | 69248973 | 0.152678583 | 0.00032407 | 0.497382859 |
| 484 | cg19637892 | PPM1M | 3 | 52282405 | 0.043555472 | 0.00032425 | 0.497382859 |
| 485 | cg08839186 | FBLN2 | 3 | 13612044 | 0.057606972 | 0.00032486 | 0.497382859 |
| 486 | cg00761069 |  | 12 | 42450230 | 0.105365507 | 0.00032549 | 0.497382859 |
| 487 | cg13426891 | CHERP | 19 | 16646901 | 0.076404124 | 0.00032815 | 0.499561421 |
| 488 | cg07620533 | PCDHGA4 | 5 | 140793470 | 0.107777035 | 0.00032826 | 0.499561421 |
| 489 | cg15105517 | SYNGR1 | 22 | 39748412 | 0.081075756 | 0.00032967 | 0.500679101 |
| 490 | cg00656860 | LBXCOR1 | 15 | 68116607 | 0.06256598 | 0.00033077 | 0.501322746 |
| 491 | cg06975815 | MAP2K2 | 19 | 4091971 | 0.03050314 | 0.00033249 | 0.501709782 |
| 492 | cg06674062 | SGCE | 7 | 94285887 | 0.048574025 | 0.00033287 | 0.501709782 |
| 493 | cg10074504 | NCS1 | 9 | 132998532 | 0.040487536 | 0.00033343 | 0.501709782 |
| 494 | cg18464802 |  | 16 | 71460420 | 0.038810974 | 0.00033374 | 0.501709782 |
| 495 | cg24479524 | UBXN10 | 1 | 20512796 | 0.035058005 | 0.00033553 | 0.501709782 |
| 496 | cg23438810 | SFRS12 | 5 | 65439580 | 0.041034024 | 0.00033567 | 0.501709782 |
| 497 | cg10573893 | COX7B2 | 4 | 46846534 | 0.031224901 | 0.00033663 | 0.501709782 |
| 498 | cg27523351 |  | 12 | 133033269 | 0.109472726 | 0.00033685 | 0.501709782 |
| 499 | cg10412127 | TPCN2 | 11 | 68848139 | 0.097512466 | 0.00033977 | 0.501709782 |
| 500 | cg04407776 | TTLL7 | 1 | 84465009 | 0.036197876 | 0.00034052 | 0.501709782 |
| 501 | cg20377627 | SCNN1G | 16 | 23194721 | 0.037585369 | 0.0003408 | 0.501709782 |
| 502 | cg13160058 | BNIP3L | 8 | 26243215 | 0.090463175 | 0.00034088 | 0.501709782 |
| 503 | cg13723316 | NAP1L4 | 11 | 2989187 | 0.037131813 | 0.00034159 | 0.501709782 |
| 504 | cg07205523 | NCK1 | 3 | 136638807 | 0.165772534 | 0.00034186 | 0.501709782 |
| 505 | cg07959458 | KLHL9 | 9 | 21332168 | 0.110126556 | 0.0003442 | 0.501709782 |
| 506 | cg09120809 | YTHDF3 | 8 | 64081332 | 0.036072783 | 0.00034519 | 0.501709782 |
| 507 | cg12480903 | CD247 | 1 | 167423965 | 0.057699226 | 0.00034592 | 0.501709782 |
| 508 | cg07180212 | SNORD1A | 17 | 74557703 | 0.063681465 | 0.00034646 | 0.501709782 |
| 509 | cg00956423 | ZNRD1 | 6 | 30029760 | 0.050609668 | 0.00034663 | 0.501709782 |
| 510 | cg14190292 |  | 22 | 29696944 | 0.058694607 | 0.0003467 | 0.501709782 |
| 511 | cg13205050 | DCST1 | 1 | 155005465 | 0.037449647 | 0.00034677 | 0.501709782 |
| 512 | cg20918386 |  | 14 | 107041993 | 0.089037202 | 0.00034702 | 0.501709782 |
| 513 | cg25355465 |  | 20 | 36576591 | 0.095051257 | 0.00034765 | 0.501709782 |
| 514 | cg20173193 | DHX30 | 3 | 47891136 | 0.060343312 | 0.00034813 | 0.501709782 |
| 515 | cg24101578 | CDH22 | 20 | 44880263 | 0.120301628 | 0.00034845 | 0.501709782 |
| 516 | cg21777343 | HDAC7 | 12 | 48202948 | 0.048746459 | 0.00034982 | 0.501709782 |
| 517 | cg12620298 | FASLG | 1 | 172631810 | 0.143826648 | 0.0003502 | 0.501709782 |
| 518 | cg01763575 | CDH22 | 20 | 44875431 | 0.072823798 | 0.00035025 | 0.501709782 |
| 519 | cg14645628 | PLXNA2 | 1 | 208309060 | 0.159986025 | 0.00035192 | 0.501709782 |
| 520 | cg02735423 | HLA-DRB5 | 6 | 32489963 | -0.432093126 | 0.00035221 | 0.501709782 |
| 521 | cg20401945 | ASPHD1 | 16 | 29912460 | 0.087950495 | 0.00035282 | 0.501709782 |
| 522 | cg22940816 | MEG3 | 14 | 101291829 | 0.038803917 | 0.00035335 | 0.501709782 |
| 523 | cg03655142 | JTB | 1 | 153950843 | 0.10915981 | 0.00035371 | 0.501709782 |
| 524 | cg23816140 |  | 12 | 109035219 | 0.095777856 | 0.00035409 | 0.501709782 |
| 525 | cg12591662 |  | X | 152055445 | 0.131469259 | 0.00035492 | 0.501709782 |
| 526 | cg11323295 |  | 2 | 19986514 | -0.188361796 | 0.00035535 | 0.501709782 |
| 527 | cg08982699 | CELF6 | 15 | 72598757 | 0.098598673 | 0.0003574 | 0.503655897 |
| 528 | cg17062249 |  | X | 48911600 | 0.178739325 | 0.00035905 | 0.503714497 |
| 529 | cg14435390 | LIPE | 19 | 42913381 | 0.077964257 | 0.00035964 | 0.503714497 |
| 530 | cg15236505 | CENPP | 9 | 95148002 | 0.244456338 | 0.00036055 | 0.503714497 |
| 531 | cg22354988 |  | 15 | 52409964 | 0.134759396 | 0.00036229 | 0.503714497 |
| 532 | cg14179315 | CACNA1I | 22 | 40011215 | 0.073001543 | 0.00036236 | 0.503714497 |
| 533 | cg27205898 | FN1 | 2 | 216246091 | -0.032742215 | 0.00036243 | 0.503714497 |
| 534 | cg24717799 | C15orf40 | 15 | 83680832 | 0.083922695 | 0.00036274 | 0.503714497 |
| 535 | cg19278232 | RHAG | 6 | 49576124 | 0.062721056 | 0.00036287 | 0.503714497 |
| 536 | cg20628335 | ZIM2 | 19 | 57352185 | 0.041101329 | 0.00036437 | 0.503882336 |
| 537 | cg25555753 |  | 19 | 3133435 | 0.096920816 | 0.00036467 | 0.503882336 |
| 538 | cg05129081 | TP63 | 3 | 189348936 | 0.128578689 | 0.00036526 | 0.503882336 |
| 539 | cg00405069 | RAB3B | 1 | 52455390 | 0.093931056 | 0.00036581 | 0.503882336 |
| 540 | cg22022568 |  | 1 | 39270310 | 0.067067663 | 0.00036808 | 0.503882336 |
| 541 | cg20182958 |  | 14 | 105654616 | 0.061273387 | 0.00036971 | 0.503882336 |
| 542 | cg22101814 | TTC39A | 1 | 51811072 | 0.066004513 | 0.00037149 | 0.503882336 |
| 543 | cg07501951 |  | 8 | 49890185 | 0.040117553 | 0.0003722 | 0.503882336 |
| 544 | cg26600954 | C7orf46 | 7 | 23719792 | 0.031383921 | 0.00037427 | 0.503882336 |
| 545 | cg17217059 | FAM160A1 | 4 | 152329364 | 0.041630862 | 0.00037457 | 0.503882336 |
| 546 | cg11116758 |  | 19 | 7938601 | 0.104565701 | 0.0003754 | 0.503882336 |
| 547 | cg20343278 | PTPRM | 18 | 7946813 | 0.214007745 | 0.00037571 | 0.503882336 |
| 548 | cg01957946 | LRSAM1 | 9 | 130230645 | 0.100763326 | 0.00037611 | 0.503882336 |
| 549 | cg08651015 | OGT | X | 70752053 | 0.084671023 | 0.00037645 | 0.503882336 |
| 550 | cg10060499 |  | X | 39378734 | 0.111963524 | 0.00037714 | 0.503882336 |
| 551 | cg05166684 | GDF2 | 10 | 48413742 | 0.045380295 | 0.00037759 | 0.503882336 |
| 552 | cg14314341 | CASZ1 | 1 | 10852735 | 0.048546248 | 0.00037963 | 0.503882336 |
| 553 | cg09766721 | SLC13A3 | 20 | 45237014 | 0.250931029 | 0.00037982 | 0.503882336 |
| 554 | cg26034770 |  | 7 | 27071294 | 0.0911413 | 0.00037997 | 0.503882336 |
| 555 | cg26856501 | DIDO1 | 20 | 61511872 | 0.058012943 | 0.00038064 | 0.503882336 |
| 556 | cg13999606 | TOMM20L | 14 | 58862457 | 0.040012239 | 0.0003811 | 0.503882336 |
| 557 | cg25025295 | KDM2B | 12 | 121968634 | 0.095426252 | 0.00038137 | 0.503882336 |
| 558 | cg03808418 |  | 9 | 2748746 | 0.064160706 | 0.00038222 | 0.503882336 |
| 559 | cg18144025 | TEX29 | 13 | 111972291 | 0.043843735 | 0.00038264 | 0.503882336 |
| 560 | cg05166354 | ARHGAP8 | 22 | 45216631 | 0.045169614 | 0.00038323 | 0.503882336 |
| 561 | cg02404507 |  | 6 | 42712100 | 0.114820813 | 0.00038365 | 0.503882336 |
| 562 | cg04041960 | RGS10 | 10 | 121301765 | 0.056026998 | 0.00038367 | 0.503882336 |
| 563 | cg09242846 |  | 11 | 97555260 | 0.074267103 | 0.00038447 | 0.503882336 |
| 564 | cg12426888 |  | 3 | 147103303 | 0.091915588 | 0.00038645 | 0.503882336 |
| 565 | cg18747561 | SCIN | 7 | 12624860 | 0.187136981 | 0.00038669 | 0.503882336 |
| 566 | cg04756597 |  | 22 | 44730607 | 0.058420328 | 0.00038682 | 0.503882336 |
| 567 | cg09730930 |  | 5 | 174135571 | 0.094662035 | 0.00038731 | 0.503882336 |
| 568 | cg16293575 | ZNF215 | 11 | 6948211 | 0.047678122 | 0.00038742 | 0.503882336 |
| 569 | cg11924824 | NUAK1 | 12 | 106526464 | 0.05933073 | 0.00038776 | 0.503882336 |
| 570 | cg26839356 |  | 15 | 99603018 | 0.069573437 | 0.00038947 | 0.503882336 |
| 571 | cg14722402 | ST6GAL1 | 3 | 186692377 | 0.058387034 | 0.00039023 | 0.503882336 |
| 572 | cg13246573 | FTX | X | 73471464 | 0.120107827 | 0.00039129 | 0.503882336 |
| 573 | cg08035277 | LRP5 | 11 | 68193598 | 0.073011729 | 0.00039167 | 0.503882336 |
| 574 | cg08118114 | LHX3 | 9 | 139093217 | 0.203539644 | 0.00039168 | 0.503882336 |
| 575 | cg19567335 |  | 14 | 105638590 | 0.048425655 | 0.00039267 | 0.503882336 |
| 576 | cg04478612 | ADGRA2 | 8 | 37694279 | 0.088078239 | 0.00039346 | 0.503882336 |
| 577 | cg14458068 | PCDHGA4 | 5 | 140772256 | 0.103499643 | 0.00039452 | 0.503882336 |
| 578 | cg04771950 |  | 13 | 47707066 | 0.08766551 | 0.0003954 | 0.503882336 |
| 579 | cg17207552 |  | X | 39767775 | 0.094694351 | 0.0003958 | 0.503882336 |
| 580 | cg07006987 |  | 7 | 1283570 | 0.058640929 | 0.00039792 | 0.503882336 |
| 581 | cg01776418 |  | 17 | 47936423 | 0.061026259 | 0.00039793 | 0.503882336 |
| 582 | cg07757535 |  | 4 | 1339547 | 0.088103583 | 0.00039836 | 0.503882336 |
| 583 | cg18907180 |  | 14 | 97499987 | 0.070219876 | 0.00039866 | 0.503882336 |
| 584 | cg04771169 | XKR6 | 8 | 10834132 | 0.10288438 | 0.00040041 | 0.503882336 |
| 585 | cg09007977 | RHEBL1 | 12 | 49464993 | 0.069174356 | 0.00040155 | 0.503882336 |
| 586 | cg10885338 | C2orf40 | 2 | 106682640 | 0.162640789 | 0.00040164 | 0.503882336 |
| 587 | cg02693688 | LOC100133612 | 1 | 3818083 | 0.072095997 | 0.0004018 | 0.503882336 |
| 588 | cg21488829 |  | 20 | 36137759 | 0.068643189 | 0.00040197 | 0.503882336 |
| 589 | cg02652051 | ARHGAP6 | X | 11456107 | 0.182628014 | 0.00040243 | 0.503882336 |
| 590 | cg19388710 | EDC4 | 16 | 67906209 | 0.070463413 | 0.00040264 | 0.503882336 |
| 591 | cg11148364 | SNORD115-11 | 15 | 25434492 | 0.049816478 | 0.00040333 | 0.503882336 |
| 592 | cg06275774 | PCNXL2 | 1 | 233151949 | 0.164882867 | 0.0004041 | 0.503882336 |
| 593 | cg07957619 | GTPBP2 | 6 | 43595208 | 0.149352471 | 0.00040487 | 0.503882336 |
| 594 | cg00877792 | ADRA1A | 8 | 26621745 | 0.150051248 | 0.00040555 | 0.503882336 |
| 595 | cg20071427 | ZNF331 | 19 | 54058085 | 0.05083578 | 0.00040638 | 0.503882336 |
| 596 | cg09355428 |  | 1 | 212641399 | 0.087872937 | 0.00040683 | 0.503882336 |
| 597 | cg00961418 | STK33 | 11 | 8616172 | 0.100100845 | 0.00040735 | 0.503882336 |
| 598 | cg14681207 | ZNHIT3 | 17 | 34841934 | 0.071619584 | 0.00040796 | 0.503882336 |
| 599 | cg03291825 | TK1 | 17 | 76182433 | 0.129254712 | 0.00040867 | 0.503882336 |
| 600 | cg01373599 | DIP2C | 10 | 367490 | 0.069969909 | 0.00040912 | 0.503882336 |
| 601 | cg15627108 | C6orf208 | 6 | 170189864 | 0.129017239 | 0.00040936 | 0.503882336 |
| 602 | cg06642275 |  | 12 | 54145184 | 0.035600503 | 0.00040959 | 0.503882336 |
| 603 | cg12936709 | OR1D2 | 17 | 2997405 | 0.058876592 | 0.00040963 | 0.503882336 |
| 604 | cg02602504 | CLIP1-AS1 | 12 | 122880396 | 0.043337794 | 0.00041047 | 0.503882336 |
| 605 | cg14831539 | PAX7 | 1 | 18988324 | 0.041727136 | 0.00041102 | 0.503882336 |
| 606 | cg22848676 | LIMK1 | 7 | 73508200 | 0.064537989 | 0.00041236 | 0.503882336 |
| 607 | cg03648631 | UBE2D3 | 4 | 103749307 | 0.033524814 | 0.00041253 | 0.503882336 |
| 608 | cg02299843 | PCDHB6 | 5 | 140529440 | 0.160438515 | 0.00041265 | 0.503882336 |
| 609 | cg11496113 |  | 5 | 34627766 | 0.058979019 | 0.00041377 | 0.503882336 |
| 610 | cg15189860 |  | 7 | 65647879 | 0.062245579 | 0.00041458 | 0.503882336 |
| 611 | cg03038413 | CCDC12 | 3 | 46967742 | 0.060648011 | 0.00041571 | 0.503882336 |
| 612 | cg12326700 | LRRC43 | 12 | 122667505 | 0.039438796 | 0.00041571 | 0.503882336 |
| 613 | cg07524679 | TLX2 | 2 | 74742593 | 0.077385022 | 0.00041591 | 0.503882336 |
| 614 | cg18845318 |  | 5 | 171467334 | 0.083161467 | 0.0004166 | 0.503887393 |
| 615 | cg03458099 |  | 2 | 223532694 | 0.086224368 | 0.00041891 | 0.504588161 |
| 616 | cg23352942 | PTH1R | 3 | 46931381 | 0.120303045 | 0.00041897 | 0.504588161 |
| 617 | cg05893785 | NODAL | 10 | 72201943 | 0.073253984 | 0.00041921 | 0.504588161 |
| 618 | cg19196221 |  | 19 | 56215575 | 0.124410145 | 0.00042076 | 0.505000574 |
| 619 | cg13578408 | NXPH1 | 7 | 8475484 | 0.068639165 | 0.00042092 | 0.505000574 |
| 620 | cg02254390 |  | 19 | 48075096 | 0.077083323 | 0.00042197 | 0.505445131 |
| 621 | cg26995653 |  | 2 | 858038 | 0.130208281 | 0.00042294 | 0.505543899 |
| 622 | cg15651860 |  | 20 | 21510807 | 0.046866935 | 0.00042387 | 0.505543899 |
| 623 | cg19945464 | GAS2 | 11 | 22688748 | 0.043043211 | 0.00042409 | 0.505543899 |
| 624 | cg03244701 |  | 6 | 170390429 | 0.029757435 | 0.00042504 | 0.505858303 |
| 625 | cg16461551 |  | X | 47156803 | 0.119349413 | 0.00042662 | 0.506936361 |
| 626 | cg25566442 |  | 17 | 75266392 | 0.170898988 | 0.00042805 | 0.507202207 |
| 627 | cg01883482 | NKAIN4 | 20 | 61884645 | 0.037333513 | 0.00042821 | 0.507202207 |
| 628 | cg19484548 | WDR25 | 14 | 100953108 | 0.105510552 | 0.00042948 | 0.507885727 |
| 629 | cg02449186 |  | X | 43411339 | 0.078862648 | 0.00043289 | 0.508200489 |
| 630 | cg22290048 | TTC6 | 14 | 38189157 | 0.070753586 | 0.00043291 | 0.508200489 |
| 631 | cg08768517 |  | 6 | 7100530 | 0.052444445 | 0.00043298 | 0.508200489 |
| 632 | cg15147792 |  | 12 | 91826056 | 0.097429323 | 0.00043323 | 0.508200489 |
| 633 | cg09665351 | SHROOM2 | X | 9755283 | 0.132807359 | 0.00043362 | 0.508200489 |
| 634 | cg21060317 |  | 5 | 74241536 | 0.06995912 | 0.00043467 | 0.508200489 |
| 635 | cg14315006 | LAMA2 | 6 | 129823454 | 0.068082397 | 0.00043513 | 0.508200489 |
| 636 | cg09750469 | TCEANC | X | 13670468 | 0.13117928 | 0.00043537 | 0.508200489 |
| 637 | cg09617422 | PTPN3 | 9 | 112145780 | 0.04387752 | 0.00043635 | 0.508200489 |
| 638 | cg12440152 | RBBP8NL | 20 | 61003859 | 0.116638126 | 0.000437 | 0.508200489 |
| 639 | cg06007042 | ROBO2 | 3 | 77092180 | 0.140596717 | 0.00043743 | 0.508200489 |
| 640 | cg10629128 | HDAC4 | 2 | 240280038 | 0.103619094 | 0.00043795 | 0.508200489 |
| 641 | cg02019955 |  | 9 | 80816683 | 0.078354679 | 0.00043924 | 0.508903328 |
| 642 | cg05284201 |  | 2 | 45520522 | 0.087623215 | 0.00044182 | 0.509603142 |
| 643 | cg23562473 | KLK15 | 19 | 51334972 | 0.067684933 | 0.00044191 | 0.509603142 |
| 644 | cg16048647 | CRTC3 | 15 | 91107436 | 0.075045357 | 0.00044361 | 0.509603142 |
| 645 | cg01390564 | PRSS36 | 16 | 31162282 | 0.079354542 | 0.00044419 | 0.509603142 |
| 646 | cg01864982 | PRKCG | 19 | 54409631 | 0.120299082 | 0.00044477 | 0.509603142 |
| 647 | cg26648763 | MAP7D2 | X | 20048113 | 0.094280524 | 0.00044488 | 0.509603142 |
| 648 | cg09202696 |  | 17 | 46949554 | 0.087470261 | 0.00044513 | 0.509603142 |
| 649 | cg22143289 | VSTM2B | 19 | 30019898 | 0.032313705 | 0.00044534 | 0.509603142 |
| 650 | cg03845988 | FAM65A | 16 | 67573992 | 0.050048752 | 0.00044659 | 0.510253669 |
| 651 | cg17607238 | IPCEF1 | 6 | 154569104 | 0.055012691 | 0.00044943 | 0.511430712 |
| 652 | cg21771250 | FAM83F | 22 | 40406049 | 0.132667115 | 0.00045243 | 0.511430712 |
| 653 | cg27661264 | GNAS | 20 | 57427738 | 0.051050008 | 0.00045244 | 0.511430712 |
| 654 | cg04562714 |  | 16 | 22645718 | 0.07987566 | 0.0004535 | 0.511430712 |
| 655 | cg25274157 | NDUFA13 | 19 | 19626576 | 0.071722841 | 0.00045435 | 0.511430712 |
| 656 | cg19844704 | EMX2 | 10 | 119304705 | 0.03657658 | 0.00045476 | 0.511430712 |
| 657 | cg27423445 | APOLD1 | 12 | 12879764 | 0.086272675 | 0.00045559 | 0.511430712 |
| 658 | cg06438625 | SCML4 | 6 | 108066648 | 0.042663738 | 0.00045604 | 0.511430712 |
| 659 | cg27296330 | ZNF331 | 19 | 54041251 | 0.062383741 | 0.00045713 | 0.511430712 |
| 660 | cg24983605 | ZNF385B | 2 | 180487919 | 0.240698348 | 0.00045724 | 0.511430712 |
| 661 | cg19432010 |  | 14 | 56382162 | 0.027815069 | 0.00045819 | 0.511430712 |
| 662 | cg15972922 | ATF7 | 12 | 53918875 | 0.044669972 | 0.0004585 | 0.511430712 |
| 663 | cg04227758 | NT5E | 6 | 86186351 | 0.045198208 | 0.0004594 | 0.511430712 |
| 664 | cg00789528 | TOX2 | 20 | 42543034 | 0.087734215 | 0.00046069 | 0.511430712 |
| 665 | cg08269943 |  | 12 | 101130962 | 0.069357487 | 0.00046325 | 0.511430712 |
| 666 | cg15725616 | GNAS | 20 | 57415955 | 0.055680599 | 0.00046393 | 0.511430712 |
| 667 | cg10246296 | CLCN4 | X | 10124977 | 0.107386704 | 0.00046396 | 0.511430712 |
| 668 | cg20265805 | HNF4A | 20 | 43029468 | 0.075757442 | 0.00046491 | 0.511430712 |
| 669 | cg15741887 | FOXN3 | 14 | 89818370 | 0.100498645 | 0.00046531 | 0.511430712 |
| 670 | cg04129308 | TCF21 | 6 | 134214995 | 0.107126464 | 0.00046557 | 0.511430712 |
| 671 | cg21350323 |  | 5 | 130341839 | 0.117176793 | 0.00046565 | 0.511430712 |
| 672 | cg15254881 | GRM8 | 7 | 126890512 | 0.13606209 | 0.00046566 | 0.511430712 |
| 673 | cg08243790 |  | 8 | 127485353 | 0.045194664 | 0.00046612 | 0.511430712 |
| 674 | cg11451334 |  | 1 | 16840801 | 0.029471119 | 0.00046651 | 0.511430712 |
| 675 | cg15540144 | C2orf55 | 2 | 99553141 | 0.025173422 | 0.00046732 | 0.511430712 |
| 676 | cg18275775 |  | 4 | 115308277 | 0.164163744 | 0.00046757 | 0.511430712 |
| 677 | cg11744538 |  | 17 | 42646995 | 0.467941341 | 0.0004685 | 0.511430712 |
| 678 | cg14703138 | KCP | 7 | 128552004 | 0.123552943 | 0.00046905 | 0.511430712 |
| 679 | cg06701796 |  | 19 | 47745582 | 0.052535976 | 0.00046962 | 0.511430712 |
| 680 | cg04918082 |  | 7 | 100547176 | 0.074659259 | 0.00047012 | 0.511430712 |
| 681 | cg03436478 | SGCE | 7 | 94286760 | 0.053588176 | 0.0004706 | 0.511430712 |
| 682 | cg00929476 |  | X | 136645736 | 0.132217477 | 0.00047085 | 0.511430712 |
| 683 | cg05707190 |  | 15 | 99558427 | 0.024607062 | 0.00047202 | 0.511430712 |
| 684 | cg04770364 | CIT | 12 | 120127985 | 0.05109538 | 0.00047306 | 0.511430712 |
| 685 | cg20433521 | C1orf130 | 1 | 24882991 | 0.069864549 | 0.00047319 | 0.511430712 |
| 686 | cg13882837 | ADRBK2 | 22 | 26055346 | 0.040948662 | 0.00047441 | 0.511430712 |
| 687 | cg13299268 | CSMD3 | 8 | 113477467 | 0.107123307 | 0.00047571 | 0.511430712 |
| 688 | cg25407198 | MEST | 7 | 130131268 | 0.04340143 | 0.00047686 | 0.511430712 |
| 689 | cg00096328 |  | 3 | 41200046 | 0.111155135 | 0.00047711 | 0.511430712 |
| 690 | cg09814551 | SPINLW1 | 20 | 44174942 | 0.040053271 | 0.00047712 | 0.511430712 |
| 691 | cg17731710 |  | 10 | 47652495 | 0.062085406 | 0.00047744 | 0.511430712 |
| 692 | cg11711816 |  | 10 | 131764932 | 0.073423277 | 0.00047779 | 0.511430712 |
| 693 | cg27444329 | RADIL | 7 | 4882032 | 0.11649079 | 0.00047842 | 0.511430712 |
| 694 | cg12093519 |  | 7 | 19146441 | 0.056515186 | 0.00047844 | 0.511430712 |
| 695 | cg11791444 | LINC01529 | 19 | 36288800 | 0.10181898 | 0.00047889 | 0.511430712 |
| 696 | cg10382835 | MRPS10 | 6 | 42185730 | 0.045288636 | 0.0004793 | 0.511430712 |
| 697 | cg07817810 | SETD2 | 3 | 47205858 | 0.030983265 | 0.00048179 | 0.511584556 |
| 698 | cg25131296 |  | 5 | 89296355 | 0.087991699 | 0.00048302 | 0.511584556 |
| 699 | cg26737850 | BAIAP3 | 16 | 1384991 | 0.068443284 | 0.0004835 | 0.511584556 |
| 700 | cg16877162 |  | 13 | 53850898 | 0.110239782 | 0.00048353 | 0.511584556 |
| 701 | cg06152354 |  | 1 | 229649855 | 0.073343138 | 0.00048369 | 0.511584556 |
| 702 | cg06774207 | MIR5694 | 10 | 122747138 | 0.077001916 | 0.00048442 | 0.511584556 |
| 703 | cg02103924 |  | 1 | 110672857 | 0.061432896 | 0.0004855 | 0.511584556 |
| 704 | cg17862368 | CD300LG | 17 | 41935474 | 0.084761802 | 0.00048594 | 0.511584556 |
| 705 | cg06448156 | ADAMTS2 | 5 | 178763438 | 0.129658564 | 0.00048609 | 0.511584556 |
| 706 | cg22629853 | MTPAP | 10 | 30638455 | 0.068606226 | 0.00048969 | 0.511584556 |
| 707 | cg25684111 |  | X | 150147927 | 0.079232351 | 0.00048975 | 0.511584556 |
| 708 | cg25024558 | NVL | 1 | 224421053 | 0.072370991 | 0.00049093 | 0.511584556 |
| 709 | cg08111158 |  | 1 | 227746191 | 0.172451664 | 0.00049108 | 0.511584556 |
| 710 | cg17073733 | WNT1 | 12 | 49374657 | 0.028296382 | 0.00049149 | 0.511584556 |
| 711 | cg19362080 | RUSC1 | 1 | 155297285 | 0.068359919 | 0.00049396 | 0.511584556 |
| 712 | cg02220284 | FOXP1 | 3 | 71013485 | -0.082965811 | 0.00049396 | 0.511584556 |
| 713 | cg21641512 | C4orf23 | 4 | 8455100 | 0.040214796 | 0.00049399 | 0.511584556 |
| 714 | cg01101865 | FLJ43390 | 14 | 62584565 | 0.090531881 | 0.00049417 | 0.511584556 |
| 715 | cg26687413 |  | 5 | 1645459 | 0.056788995 | 0.00049441 | 0.511584556 |
| 716 | cg18894440 |  | 8 | 76321233 | 0.183232904 | 0.00049498 | 0.511584556 |
| 717 | cg12993960 | MAEA | 4 | 1300068 | 0.081449766 | 0.00049533 | 0.511584556 |
| 718 | cg20303331 | PIP4K2B | 17 | 36945575 | 0.105863704 | 0.00049544 | 0.511584556 |
| 719 | cg20847827 | SLC2A1 | 1 | 43397051 | 0.055003164 | 0.00049597 | 0.511584556 |
| 720 | cg12851789 | ODZ4 | 11 | 78380792 | 0.025185799 | 0.00049598 | 0.511584556 |
| 721 | cg05074947 | STC2 | 5 | 172753924 | 0.05635529 | 0.00049718 | 0.512017473 |
| 722 | cg26670366 | ABCA10 | 17 | 67172411 | 0.203492695 | 0.00049958 | 0.512017473 |
| 723 | cg17226042 | MEAF6 | 1 | 37973652 | 0.116160415 | 0.00050089 | 0.512017473 |
| 724 | cg21967545 | FUT6 | 19 | 5838807 | 0.05610293 | 0.00050127 | 0.512017473 |
| 725 | cg12114985 | SPHK2 | 19 | 49127660 | 0.044679886 | 0.00050171 | 0.512017473 |
| 726 | cg01741372 |  | 11 | 783889 | 0.120411865 | 0.00050557 | 0.512017473 |
| 727 | cg13510429 | PDZD4 | X | 153094195 | 0.13394307 | 0.00050685 | 0.512017473 |
| 728 | cg09423066 | C15orf27 | 15 | 76461960 | 0.081316915 | 0.00050697 | 0.512017473 |
| 729 | cg07770049 |  | 4 | 187219230 | 0.063729404 | 0.00050735 | 0.512017473 |
| 730 | cg04856872 |  | 22 | 39954667 | 0.073475722 | 0.00050772 | 0.512017473 |
| 731 | cg17156227 | SLC4A11 | 20 | 3209945 | 0.031638842 | 0.00051108 | 0.512017473 |
| 732 | cg25455982 |  | 13 | 50467971 | 0.087654746 | 0.00051276 | 0.512017473 |
| 733 | cg04833034 | DPYSL3 | 5 | 146832182 | 0.080054696 | 0.00051358 | 0.512017473 |
| 734 | cg09384035 |  | 8 | 104131768 | 0.070425448 | 0.00051382 | 0.512017473 |
| 735 | cg26294037 |  | 2 | 222683753 | 0.111571487 | 0.0005146 | 0.512017473 |
| 736 | cg06725035 | PRMT2 | 21 | 48055212 | 0.036490718 | 0.00051636 | 0.512017473 |
| 737 | cg14153651 |  | X | 52952759 | 0.053923655 | 0.0005165 | 0.512017473 |
| 738 | cg12171875 | PDE12 | 3 | 57546348 | 0.066412931 | 0.00051655 | 0.512017473 |
| 739 | cg24203465 | GNASAS | 20 | 57425986 | 0.054938443 | 0.00051746 | 0.512017473 |
| 740 | cg08793976 | TNRC18 | 7 | 5421848 | 0.070011342 | 0.0005177 | 0.512017473 |
| 741 | cg01566396 |  | 2 | 161126295 | 0.069021145 | 0.00051842 | 0.512017473 |
| 742 | cg17830714 | DNASE1L1 | X | 153630330 | 0.165329853 | 0.00051876 | 0.512017473 |
| 743 | cg06248767 | LYN | 8 | 56852290 | 0.042948237 | 0.00051896 | 0.512017473 |
| 744 | cg24042136 | PPP3CA | 4 | 102109243 | 0.047975243 | 0.00051896 | 0.512017473 |
| 745 | cg08751451 | PRKG1 | 10 | 53287690 | 0.133734931 | 0.00052045 | 0.512017473 |
| 746 | cg12239218 | LRP1 | 12 | 57593337 | 0.053810011 | 0.00052197 | 0.512017473 |
| 747 | cg03141347 |  | 6 | 47094389 | 0.145493963 | 0.00052387 | 0.512017473 |
| 748 | cg18592964 | CAST | 5 | 96051476 | 0.086226085 | 0.00052492 | 0.512017473 |
| 749 | cg01831473 |  | X | 13687634 | 0.084146921 | 0.00052515 | 0.512017473 |
| 750 | cg15907480 |  | 8 | 104123140 | 0.110214326 | 0.00052543 | 0.512017473 |
| 751 | cg03742137 | AGAP1 | 2 | 236504280 | 0.044098004 | 0.00052564 | 0.512017473 |
| 752 | cg06663923 | MAGIX | X | 49020767 | 0.07722318 | 0.0005257 | 0.512017473 |
| 753 | cg19040077 | D2HGDH | 2 | 242702749 | 0.141704995 | 0.00052608 | 0.512017473 |
| 754 | cg12500879 |  | 11 | 31848649 | 0.062196943 | 0.0005285 | 0.512017473 |
| 755 | cg23061435 | CDK16 | X | 47079575 | 0.078540649 | 0.00052851 | 0.512017473 |
| 756 | cg07489624 | TRIM39 | 6 | 30294195 | 0.033006022 | 0.0005291 | 0.512017473 |
| 757 | cg15331781 | GRM3 | 7 | 86274443 | 0.067858311 | 0.00053 | 0.512017473 |
| 758 | cg23516002 |  | 7 | 128099617 | 0.069395716 | 0.00053097 | 0.512017473 |
| 759 | cg10967191 |  | 16 | 49888604 | 0.049534193 | 0.00053137 | 0.512017473 |
| 760 | cg24164702 | CAPN12 | 19 | 39225147 | 0.072104512 | 0.00053185 | 0.512017473 |
| 761 | cg04919563 |  | 7 | 1280491 | 0.071087307 | 0.00053254 | 0.512017473 |
| 762 | cg27277537 | TCF20 | 22 | 42611245 | 0.116672133 | 0.00053356 | 0.512017473 |
| 763 | cg01745499 | HMGA1 | 6 | 34206084 | 0.028132377 | 0.00053379 | 0.512017473 |
| 764 | cg07661849 | ZNF827 | 4 | 146686236 | 0.042894876 | 0.00053448 | 0.512017473 |
| 765 | cg15609150 | MAML1 | 5 | 179197801 | 0.090847747 | 0.00053591 | 0.512017473 |
| 766 | cg12837996 | AMD1 | 6 | 111213918 | 0.100597461 | 0.0005367 | 0.512017473 |
| 767 | cg21998431 |  | 6 | 166132146 | 0.076945308 | 0.00053722 | 0.512017473 |
| 768 | cg11327055 |  | 9 | 4318918 | 0.092967871 | 0.00053842 | 0.512017473 |
| 769 | cg11501905 | DRD1 | 5 | 174870544 | 0.099747542 | 0.0005392 | 0.512017473 |
| 770 | cg19183842 | DLL3 | 19 | 39993358 | 0.116914353 | 0.00053922 | 0.512017473 |
| 771 | cg25277950 | MIR330 | 19 | 46142914 | 0.03072849 | 0.00054001 | 0.512017473 |
| 772 | cg15273270 | DTHD1 | 4 | 36324571 | 0.15612112 | 0.00054036 | 0.512017473 |
| 773 | cg11671400 |  | 11 | 115688887 | 0.109905785 | 0.00054045 | 0.512017473 |
| 774 | cg14791747 | THUMPD1 | 16 | 20752902 | 0.060361057 | 0.00054113 | 0.512017473 |
| 775 | cg27353919 | IP6K2 | 3 | 48754970 | 0.050733155 | 0.00054116 | 0.512017473 |
| 776 | cg24590075 |  | 17 | 40224031 | 0.026192882 | 0.00054178 | 0.512017473 |
| 777 | cg01569388 | MAP6 | 11 | 75303936 | 0.06299704 | 0.00054212 | 0.512017473 |
| 778 | cg05303842 | SLC26A6 | 3 | 48673523 | 0.040457988 | 0.00054238 | 0.512017473 |
| 779 | cg14319628 | TMEM178B | 7 | 140931519 | 0.102247523 | 0.00054254 | 0.512017473 |
| 780 | cg12700732 | CABP7 | 22 | 30117159 | 0.079026699 | 0.00054318 | 0.512017473 |
| 781 | cg17708996 |  | 4 | 158741194 | 0.070620764 | 0.00054345 | 0.512017473 |
| 782 | cg26091808 | CPNE7 | 16 | 89660453 | 0.120774466 | 0.00054346 | 0.512017473 |
| 783 | cg23509861 | SNX2 | 5 | 122109428 | 0.125550157 | 0.00054461 | 0.512017473 |
| 784 | cg12157702 | COL16A1 | 1 | 32139253 | 0.04884568 | 0.00054516 | 0.512017473 |
| 785 | cg17091024 | RND2 | 17 | 41176000 | 0.083520672 | 0.00054561 | 0.512017473 |
| 786 | cg23319790 | MIR519D | 19 | 54215487 | 0.071888647 | 0.00054577 | 0.512017473 |
| 787 | cg15194163 | PRRT1 | 6 | 32118213 | 0.086305258 | 0.0005469 | 0.512017473 |
| 788 | cg04269700 | KRT79 | 12 | 53229024 | 0.043882777 | 0.00054693 | 0.512017473 |
| 789 | cg18817560 | C1GALT1C1L | 2 | 43903689 | 0.079273105 | 0.00054708 | 0.512017473 |
| 790 | cg05845767 | CDH22 | 20 | 44906372 | 0.0920442 | 0.00054767 | 0.512017473 |
| 791 | cg18759190 | DYRK3 | 1 | 206808250 | 0.040190239 | 0.00054773 | 0.512017473 |
| 792 | cg13644197 | METRNL | 17 | 81039820 | 0.120587258 | 0.00054776 | 0.512017473 |
| 793 | cg23274030 | SFXN4 | 10 | 120925632 | 0.088297963 | 0.0005495 | 0.512017473 |
| 794 | cg14943908 | BAT2 | 6 | 31589196 | 0.028893086 | 0.00054969 | 0.512017473 |
| 795 | cg10215507 | C20orf56 | 20 | 22559305 | 0.063580733 | 0.00055135 | 0.512017473 |
| 796 | cg14251951 |  | 20 | 39180055 | 0.080958274 | 0.00055152 | 0.512017473 |
| 797 | cg21416739 |  | 12 | 132429311 | 0.045525802 | 0.00055196 | 0.512017473 |
| 798 | cg10109590 | RIN3 | 14 | 93090866 | 0.059383988 | 0.00055402 | 0.512017473 |
| 799 | cg17872763 | DDX39 | 19 | 14526609 | 0.047051871 | 0.00055474 | 0.512017473 |
| 800 | cg07583563 | CALM1 | 14 | 90867498 | 0.118774977 | 0.00055666 | 0.512017473 |
| 801 | cg16345668 | BCYRN1 | X | 70775097 | 0.175307129 | 0.0005567 | 0.512017473 |
| 802 | cg22226024 | RCC2 | 1 | 17759877 | 0.068514438 | 0.00055696 | 0.512017473 |
| 803 | cg00076487 |  | 2 | 133036935 | 0.055943579 | 0.00055796 | 0.512017473 |
| 804 | cg21873954 | ELFN1-AS1 | 7 | 1782015 | 0.051225217 | 0.00055869 | 0.512017473 |
| 805 | cg27064928 | ASFMR1 | X | 146996911 | 0.101163014 | 0.00055938 | 0.512017473 |
| 806 | cg13979277 | LMX1B | 9 | 129388281 | 0.032492346 | 0.00056066 | 0.512017473 |
| 807 | cg22122013 | FAM178B | 2 | 97564501 | 0.03617038 | 0.00056234 | 0.512017473 |
| 808 | cg23834034 | NADK | 1 | 1712821 | 0.055657049 | 0.00056301 | 0.512017473 |
| 809 | cg03858223 | TRDN | 6 | 123810848 | 0.156506191 | 0.0005631 | 0.512017473 |
| 810 | cg15795255 |  | 19 | 18721840 | 0.048828165 | 0.00056379 | 0.512017473 |
| 811 | cg19184708 | CENPN | 16 | 81063835 | 0.071714982 | 0.00056418 | 0.512017473 |
| 812 | cg11608653 | PHF2 | 9 | 96407260 | 0.057049329 | 0.00056423 | 0.512017473 |
| 813 | cg23860422 | C4orf49 | 4 | 140201537 | 0.084901278 | 0.00056553 | 0.512017473 |
| 814 | cg17456304 | SPON2 | 4 | 1160842 | 0.088533604 | 0.0005664 | 0.512017473 |
| 815 | cg10319545 | LIMA1 | 12 | 50595417 | 0.193784445 | 0.00056682 | 0.512017473 |
| 816 | cg15388048 | BCAR3 | 1 | 94267084 | 0.167044818 | 0.00056723 | 0.512017473 |
| 817 | cg03536771 | LINC01270 | 20 | 48910151 | 0.097570169 | 0.00056742 | 0.512017473 |
| 818 | cg16417787 | GIPC3 | 19 | 3585280 | 0.086240588 | 0.00056862 | 0.512017473 |
| 819 | cg16882376 |  | 16 | 2046352 | 0.132799224 | 0.00056869 | 0.512017473 |
| 820 | cg17885341 | LOC102467655 | 5 | 67485587 | 0.181143701 | 0.00057014 | 0.512017473 |
| 821 | cg07634191 | SCARA5 | 8 | 27850178 | 0.063039028 | 0.00057127 | 0.512017473 |
| 822 | cg16347928 | FLJ39609 | 1 | 854838 | 0.052279853 | 0.00057327 | 0.512017473 |
| 823 | cg13701910 |  | 10 | 4174368 | 0.046973423 | 0.00057438 | 0.512017473 |
| 824 | cg23483069 | VSNL1 | 2 | 17825778 | 0.025901891 | 0.00057514 | 0.512017473 |
| 825 | cg10200286 |  | 5 | 3695937 | 0.070245122 | 0.00057602 | 0.512017473 |
| 826 | cg22016571 | MST4 | X | 131157426 | 0.134263682 | 0.00057706 | 0.512017473 |
| 827 | cg01724150 | NMNAT3 | 3 | 139397363 | 0.094305017 | 0.00058 | 0.512017473 |
| 828 | cg16921727 |  | 7 | 51539678 | 0.063192961 | 0.00058169 | 0.512017473 |
| 829 | cg13536522 | SHANK1 | 19 | 51170017 | 0.057105348 | 0.00058204 | 0.512017473 |
| 830 | cg21266975 | EMILIN2 | 18 | 2846181 | 0.093575307 | 0.00058335 | 0.512017473 |
| 831 | cg05295427 |  | 14 | 62330970 | 0.074005997 | 0.00058375 | 0.512017473 |
| 832 | cg25194451 | SNX22 | 15 | 64445647 | 0.075518843 | 0.00058382 | 0.512017473 |
| 833 | cg16669623 |  | X | 23844698 | 0.119263035 | 0.00058559 | 0.512017473 |
| 834 | cg11409620 | RAB36 | 22 | 23487458 | 0.057126496 | 0.00058805 | 0.512017473 |
| 835 | cg06861427 |  | 6 | 58777390 | 0.044242847 | 0.00058818 | 0.512017473 |
| 836 | cg14666972 | SEMA4B | 15 | 90745322 | 0.050526413 | 0.00058823 | 0.512017473 |
| 837 | cg17457514 | CORO2B | 15 | 68908975 | 0.05696314 | 0.00058844 | 0.512017473 |
| 838 | cg25450929 |  | 3 | 187841188 | 0.128240451 | 0.00058869 | 0.512017473 |
| 839 | cg07584450 | GRIA1 | 5 | 152870367 | 0.038741897 | 0.00058983 | 0.512017473 |
| 840 | cg24693189 | SYNC | 1 | 33165288 | 0.039937228 | 0.00059059 | 0.512017473 |
| 841 | cg04501839 | CYP2C18 | 10 | 96442623 | 0.165097789 | 0.00059099 | 0.512017473 |
| 842 | cg02566359 | DNAJC30 | 7 | 73095446 | 0.06761359 | 0.00059118 | 0.512017473 |
| 843 | cg18500431 |  | 7 | 1709489 | 0.028115375 | 0.00059124 | 0.512017473 |
| 844 | cg07155243 | NFIA | 1 | 61870246 | 0.178825495 | 0.00059499 | 0.512017473 |
| 845 | cg05617775 | MIR5096 | 1 | 16229489 | 0.102444494 | 0.0005956 | 0.512017473 |
| 846 | cg15839043 |  | 11 | 81585908 | 0.089785745 | 0.00059598 | 0.512017473 |
| 847 | cg27420687 | HTR1A | 5 | 63258592 | 0.082786737 | 0.00059651 | 0.512017473 |
| 848 | cg18282441 |  | 2 | 235080382 | 0.052445123 | 0.00059771 | 0.512017473 |
| 849 | cg19379712 | VPS13B | 8 | 100559744 | 0.204415741 | 0.00059785 | 0.512017473 |
| 850 | cg08175831 | EDA | X | 69245611 | 0.063242316 | 0.00059793 | 0.512017473 |
| 851 | cg13737829 |  | 14 | 95358161 | 0.104917129 | 0.00059793 | 0.512017473 |
| 852 | cg25257808 | CALCOCO2 | 17 | 46941705 | 0.0517214 | 0.00059888 | 0.512017473 |
| 853 | cg26863795 | C16orf87 | 16 | 46866502 | 0.115191375 | 0.00059965 | 0.512017473 |
| 854 | cg15378486 |  | 17 | 79491582 | 0.08832047 | 0.0006 | 0.512017473 |
| 855 | cg09632065 |  | 4 | 42675256 | 0.119267071 | 0.00060059 | 0.512017473 |
| 856 | cg07624705 | NDUFA13 | 19 | 19626525 | 0.087755851 | 0.00060151 | 0.512017473 |
| 857 | cg02292066 | C1orf93 | 1 | 2518269 | 0.035940275 | 0.00060178 | 0.512017473 |
| 858 | cg01743875 | CETN2 | X | 152000554 | 0.127630936 | 0.00060214 | 0.512017473 |
| 859 | cg26780993 |  | 11 | 28469945 | 0.174202515 | 0.00060221 | 0.512017473 |
| 860 | cg08465999 |  | X | 64820222 | 0.205986596 | 0.00060244 | 0.512017473 |
| 861 | cg09717406 | C6orf222 | 6 | 36305133 | 0.149700059 | 0.00060245 | 0.512017473 |
| 862 | cg12054318 | GNASAS | 20 | 57414529 | 0.064040766 | 0.00060283 | 0.512017473 |
| 863 | cg27235726 | PRKAR1B | 7 | 750819 | 0.046420411 | 0.0006039 | 0.512017473 |
| 864 | cg24922045 | GAS2L2 | 17 | 34079987 | 0.070053651 | 0.00060451 | 0.512017473 |
| 865 | cg04332442 | CELSR1 | 22 | 46770063 | 0.130821332 | 0.0006052 | 0.512017473 |
| 866 | cg18909235 | C17orf28 | 17 | 72948506 | 0.163306463 | 0.00060555 | 0.512017473 |
| 867 | cg13604592 | AGPAT3 | 21 | 45393592 | 0.041443787 | 0.00060589 | 0.512017473 |
| 868 | cg11792779 |  | 6 | 156594727 | 0.149172239 | 0.00060622 | 0.512017473 |
| 869 | cg13728768 | JADE2 | 5 | 133869802 | 0.069941339 | 0.00060675 | 0.512017473 |
| 870 | cg05380920 | EDIL3 | 5 | 83270142 | 0.095447823 | 0.00060701 | 0.512017473 |
| 871 | cg02202858 | MIIP | 1 | 12079252 | 0.07805942 | 0.00060726 | 0.512017473 |
| 872 | cg27654029 | DOT1L | 19 | 2173764 | 0.053490786 | 0.00060753 | 0.512017473 |
| 873 | cg05476318 |  | 7 | 20653723 | 0.077362843 | 0.00060812 | 0.512017473 |
| 874 | cg04619627 | FYCO1 | 3 | 46037496 | 0.049660963 | 0.00060909 | 0.512017473 |
| 875 | cg04751558 |  | 10 | 131927401 | 0.06702817 | 0.00060981 | 0.512017473 |
| 876 | cg20450889 |  | 14 | 97043565 | 0.121850158 | 0.00061016 | 0.512017473 |
| 877 | cg01381203 | FOXM1 | 12 | 2985630 | 0.058805597 | 0.00061057 | 0.512017473 |
| 878 | cg12682607 |  | 3 | 32634705 | 0.200378825 | 0.00061067 | 0.512017473 |
| 879 | cg00362487 |  | 15 | 53098554 | 0.064760567 | 0.00061291 | 0.512017473 |
| 880 | cg18102989 |  | X | 93313789 | 0.186347706 | 0.00061397 | 0.512017473 |
| 881 | cg15680955 |  | 4 | 14146058 | 0.053981227 | 0.00061506 | 0.512017473 |
| 882 | cg02481256 | LPPR2 | 19 | 11465868 | 0.078643692 | 0.00061561 | 0.512017473 |
| 883 | cg01091029 |  | 7 | 31232532 | 0.087534166 | 0.0006157 | 0.512017473 |
| 884 | cg09705531 | ZNF605 | 12 | 133525532 | 0.044186244 | 0.00061587 | 0.512017473 |
| 885 | cg20288565 | GNG4 | 1 | 235805403 | 0.087389437 | 0.00061773 | 0.512017473 |
| 886 | cg09287749 | WWC3 | X | 10076637 | 0.109537951 | 0.00061852 | 0.512017473 |
| 887 | cg14331199 | SRC | 20 | 35986463 | 0.071186387 | 0.00061921 | 0.512017473 |
| 888 | cg08814944 | LDLRAD4 | 18 | 13245910 | 0.168579157 | 0.00061982 | 0.512017473 |
| 889 | cg17174661 | NARF | 17 | 80415617 | 0.07383297 | 0.0006213 | 0.512017473 |
| 890 | cg00259549 |  | 8 | 689968 | 0.130361936 | 0.00062266 | 0.512017473 |
| 891 | cg12163871 | PRKD2 | 19 | 47207843 | 0.041621414 | 0.00062275 | 0.512017473 |
| 892 | cg07425555 | PODNL1 | 19 | 14049018 | 0.091293911 | 0.00062404 | 0.512017473 |
| 893 | cg03115168 | MMP28 | 17 | 34094046 | 0.047796661 | 0.00062426 | 0.512017473 |
| 894 | cg06760668 | SKOR1 | 15 | 68111844 | 0.070533638 | 0.00062443 | 0.512017473 |
| 895 | cg18912520 | FOXP4 | 6 | 41528623 | 0.061915252 | 0.00062526 | 0.512017473 |
| 896 | cg11808745 | BUB1 | 2 | 111432970 | 0.092324335 | 0.0006253 | 0.512017473 |
| 897 | cg11166365 | TCHH | 1 | 152087315 | 0.056751417 | 0.00062538 | 0.512017473 |
| 898 | cg13703804 | CD44 | 11 | 35187061 | 0.080872477 | 0.00062548 | 0.512017473 |
| 899 | cg06591809 |  | 1 | 180572494 | 0.068024763 | 0.00062549 | 0.512017473 |
| 900 | cg04594598 |  | 8 | 145105319 | 0.060245796 | 0.00062699 | 0.512017473 |
| 901 | cg04749549 |  | 19 | 17459798 | 0.053670942 | 0.00062856 | 0.512017473 |
| 902 | cg23324012 |  | X | 39828723 | 0.120734183 | 0.000629 | 0.512017473 |
| 903 | cg27078486 |  | 11 | 74394876 | 0.075305952 | 0.00062915 | 0.512017473 |
| 904 | cg16020508 | WWC3 | X | 10094265 | 0.079717512 | 0.0006295 | 0.512017473 |
| 905 | cg22895231 | BCAM | 19 | 45311868 | 0.063370827 | 0.00063089 | 0.512017473 |
| 906 | cg18313899 | SLC35F1 | 6 | 118228498 | 0.034209557 | 0.00063106 | 0.512017473 |
| 907 | cg03059649 |  | 5 | 158533375 | 0.054418497 | 0.00063127 | 0.512017473 |
| 908 | cg12669395 | DDR1 | 6 | 30860866 | 0.094446011 | 0.00063277 | 0.512017473 |
| 909 | cg24426901 | PDE4A | 19 | 10541265 | 0.060170102 | 0.00063348 | 0.512017473 |
| 910 | cg21675642 |  | 7 | 46015805 | 0.153723049 | 0.00063375 | 0.512017473 |
| 911 | cg05752943 | HTR3D | 3 | 183749173 | 0.102804138 | 0.000634 | 0.512017473 |
| 912 | cg09343889 | TSPEAR | 21 | 46038627 | 0.078135901 | 0.00063415 | 0.512017473 |
| 913 | cg14854932 | BBOX1 | 11 | 27076819 | 0.233029596 | 0.00063415 | 0.512017473 |
| 914 | cg23569941 | TMBIM1 | 2 | 219139048 | 0.114250775 | 0.00063434 | 0.512017473 |
| 915 | cg13971552 | TYK2 | 19 | 10463352 | 0.025042616 | 0.00063437 | 0.512017473 |
| 916 | cg16931657 | C15orf40 | 15 | 83680837 | 0.081486032 | 0.00063449 | 0.512017473 |
| 917 | cg24507742 | SLC1A5 | 19 | 47288244 | 0.027670015 | 0.00063455 | 0.512017473 |
| 918 | cg04703318 |  | 11 | 95186117 | 0.163284901 | 0.0006353 | 0.512017473 |
| 919 | cg08273465 | FAM120C | X | 54208461 | 0.097605989 | 0.00063537 | 0.512017473 |
| 920 | cg16946840 | MED12L | 3 | 150888616 | 0.052500406 | 0.00063653 | 0.512017473 |
| 921 | cg05717863 |  | X | 39814699 | 0.118072904 | 0.00063717 | 0.512017473 |
| 922 | cg01320298 |  | 3 | 15160158 | 0.085254852 | 0.00063772 | 0.512017473 |
| 923 | cg07476406 | STK40 | 1 | 36809704 | -0.056717463 | 0.00063798 | 0.512017473 |
| 924 | cg21412923 | LINC00670 | 17 | 12523721 | 0.112159569 | 0.00063931 | 0.512017473 |
| 925 | cg16082222 | C2orf57 | 2 | 232456293 | 0.131922281 | 0.00064116 | 0.512017473 |
| 926 | cg21797863 | PRKD2 | 19 | 47181734 | 0.11916572 | 0.00064204 | 0.512017473 |
| 927 | cg10211252 | ZNF488 | 10 | 48355286 | 0.026152138 | 0.00064207 | 0.512017473 |
| 928 | cg25306939 | KCNQ1OT1 | 11 | 2722086 | 0.043740213 | 0.000644 | 0.512017473 |
| 929 | cg12882276 |  | 20 | 34290628 | 0.035237077 | 0.00064474 | 0.512017473 |
| 930 | cg04346257 | SEPT9 | 17 | 75430923 | 0.066324753 | 0.00064682 | 0.512017473 |
| 931 | cg26714514 | PAG1 | 8 | 81889651 | 0.055761914 | 0.0006474 | 0.512017473 |
| 932 | cg05111720 | SYT7 | 11 | 61301213 | 0.139090386 | 0.00064786 | 0.512017473 |
| 933 | cg08670288 |  | 10 | 124899894 | 0.057714288 | 0.00064866 | 0.512017473 |
| 934 | cg25583580 | SFRS2 | 17 | 74731433 | 0.050802351 | 0.00064941 | 0.512017473 |
| 935 | cg22830578 | LHX9 | 1 | 197884775 | 0.100345227 | 0.00064962 | 0.512017473 |
| 936 | cg15999099 | MAL2 | 8 | 120223866 | 0.161188819 | 0.00064968 | 0.512017473 |
| 937 | cg00904786 | FBXL16 | 16 | 755245 | 0.029881535 | 0.0006505 | 0.512017473 |
| 938 | cg05469530 | NUP133 | 1 | 229617950 | 0.030160417 | 0.00065052 | 0.512017473 |
| 939 | cg05427272 | CCDC177 | 14 | 70042299 | 0.101888155 | 0.00065055 | 0.512017473 |
| 940 | cg24804197 |  | 6 | 82331183 | 0.136336777 | 0.00065107 | 0.512017473 |
| 941 | cg15028047 | ATG4B | 2 | 242607778 | 0.040077474 | 0.00065115 | 0.512017473 |
| 942 | cg00993365 | CHAC2 | 2 | 53994269 | 0.081843436 | 0.00065144 | 0.512017473 |
| 943 | cg24450631 | IGF2BP2 | 3 | 185542709 | 0.069161423 | 0.00065149 | 0.512017473 |
| 944 | cg00149654 | USP9X | X | 40977612 | 0.152339714 | 0.00065251 | 0.512017473 |
| 945 | cg14520079 |  | 3 | 106825871 | 0.076828354 | 0.00065292 | 0.512017473 |
| 946 | cg22414525 |  | 8 | 27946619 | 0.10809811 | 0.00065303 | 0.512017473 |
| 947 | cg17099568 |  | 8 | 65284438 | 0.1056083 | 0.00065313 | 0.512017473 |
| 948 | cg13403455 | BAG5 | 14 | 104024873 | 0.056969821 | 0.00065722 | 0.512017473 |
| 949 | cg02701289 |  | 14 | 106072249 | 0.05560316 | 0.00065738 | 0.512017473 |
| 950 | cg19539589 |  | 22 | 22567859 | 0.059800489 | 0.00065748 | 0.512017473 |
| 951 | cg08360638 |  | 13 | 20781097 | 0.116306249 | 0.00065762 | 0.512017473 |
| 952 | cg05917963 | CHUK | 10 | 101988539 | 0.086640744 | 0.00065931 | 0.512017473 |
| 953 | cg11562309 | SGCE | 7 | 94286473 | 0.049135411 | 0.0006597 | 0.512017473 |
| 954 | cg06582411 | TFR2 | 7 | 100229865 | 0.149788922 | 0.00066011 | 0.512017473 |
| 955 | cg20119404 |  | 18 | 57069690 | 0.120065587 | 0.00066052 | 0.512017473 |
| 956 | cg04574732 | ABL2 | 1 | 179199939 | 0.075929267 | 0.00066094 | 0.512017473 |
| 957 | cg02914029 |  | 5 | 135335485 | 0.079811159 | 0.00066107 | 0.512017473 |
| 958 | cg23495820 |  | 19 | 35715624 | 0.042629924 | 0.00066142 | 0.512017473 |
| 959 | cg08686092 | NHP2L1 | 22 | 42078567 | 0.05640582 | 0.00066215 | 0.512017473 |
| 960 | cg17243001 | NUTF2 | 16 | 67880534 | 0.052663658 | 0.00066251 | 0.512017473 |
| 961 | cg01116460 |  | 4 | 15879824 | 0.06497326 | 0.00066255 | 0.512017473 |
| 962 | cg15652723 |  | 4 | 111560494 | 0.067929659 | 0.00066374 | 0.5124035 |
| 963 | cg13321259 | LRRC15 | 3 | 194090730 | 0.060286372 | 0.00066586 | 0.513361942 |
| 964 | cg10987882 | RNF24 | 20 | 3996459 | 0.048240374 | 0.00066652 | 0.513361942 |
| 965 | cg17418196 | CD80 | 3 | 119278528 | 0.112990582 | 0.00066742 | 0.513361942 |
| 966 | cg23921523 | LRRC3 | 21 | 45876245 | 0.07642992 | 0.00066876 | 0.513361942 |
| 967 | cg27490568 |  | 2 | 178487706 | 0.118293091 | 0.00067199 | 0.513361942 |
| 968 | cg14355192 | GNE | 9 | 36258114 | 0.0728936 | 0.00067201 | 0.513361942 |
| 969 | cg25682399 | SNRPN | 15 | 25137649 | 0.124308635 | 0.00067233 | 0.513361942 |
| 970 | cg11191210 | VGLL2 | 6 | 117585815 | 0.028972258 | 0.00067314 | 0.513361942 |
| 971 | cg25390334 | C2orf54 | 2 | 241827778 | 0.039594288 | 0.00067341 | 0.513361942 |
| 972 | cg10704368 | FAM102A | 9 | 130714881 | 0.146348626 | 0.00067454 | 0.513361942 |
| 973 | cg04748223 |  | 4 | 14864757 | 0.066869373 | 0.00067497 | 0.513361942 |
| 974 | cg07883537 | ABI3 | 17 | 47296912 | 0.101565754 | 0.0006757 | 0.513361942 |
| 975 | cg18943655 | BAI2 | 1 | 32209578 | 0.049643572 | 0.00067628 | 0.513361942 |
| 976 | cg06754020 | MCEE | 2 | 71345739 | 0.046839775 | 0.00067676 | 0.513361942 |
| 977 | cg21899283 | C12orf69 | 12 | 14960045 | 0.108204466 | 0.00067677 | 0.513361942 |
| 978 | cg05446860 | LOC284798 | 20 | 25129126 | 0.039292494 | 0.00067712 | 0.513361942 |
| 979 | cg17791122 | TCEANC | X | 13671632 | 0.083252356 | 0.00067788 | 0.513361942 |
| 980 | cg03508107 | NXPH3 | 17 | 47654357 | 0.029005375 | 0.00067803 | 0.513361942 |
| 981 | cg18194227 | PTOV1 | 19 | 50353410 | 0.109500851 | 0.00067812 | 0.513361942 |
| 982 | cg20086286 |  | X | 133307853 | 0.166086428 | 0.00068081 | 0.513638121 |
| 983 | cg07498275 | SALL1 | 16 | 51184886 | 0.037710731 | 0.00068101 | 0.513638121 |
| 984 | cg03110795 |  | 7 | 1329410 | 0.138427035 | 0.00068107 | 0.513638121 |
| 985 | cg21192468 | LHX3 | 9 | 139092501 | 0.120126615 | 0.00068125 | 0.513638121 |
| 986 | cg01786096 |  | 19 | 30623562 | 0.115363552 | 0.00068242 | 0.514001239 |
| 987 | cg07996352 | SLC19A1 | 21 | 46951449 | 0.032831966 | 0.0006837 | 0.514438727 |
| 988 | cg20272754 | FAM46D | X | 79590874 | 0.059967056 | 0.00068709 | 0.515806283 |
| 989 | cg13330363 | MIR548H4 | 15 | 69220397 | 0.061614314 | 0.00068733 | 0.515806283 |
| 990 | cg17218935 | TARBP2 | 12 | 53893904 | 0.041988128 | 0.00068793 | 0.515806283 |
| 991 | cg25432371 |  | 21 | 34288805 | -0.061320816 | 0.00068829 | 0.515806283 |
| 992 | cg11296224 |  | 8 | 47869097 | 0.086487516 | 0.00068908 | 0.515874159 |
| 993 | cg20444381 | TTC35 | 8 | 109456000 | 0.036258555 | 0.00069072 | 0.516444761 |
| 994 | cg19246801 |  | 13 | 112630424 | 0.0920537 | 0.00069164 | 0.516444761 |
| 995 | cg03146797 | AIRE | 21 | 45709595 | 0.072521822 | 0.00069297 | 0.516444761 |
| 996 | cg10749572 | LTF | 3 | 46506864 | 0.122330111 | 0.00069393 | 0.516444761 |
| 997 | cg21965016 |  | 18 | 61344467 | 0.091256138 | 0.00069427 | 0.516444761 |
| 998 | cg06530991 |  | 1 | 202898906 | 0.071799966 | 0.00069727 | 0.516444761 |
| 999 | cg15326579 |  | 2 | 131912441 | 0.083536433 | 0.00069733 | 0.516444761 |
| 1000 | cg11795809 | UNQ6494 | 9 | 92271335 | 0.150713809 | 0.00069742 | 0.516444761 |
| 1001 | cg04526361 |  | 7 | 22007577 | 0.066633154 | 0.00069755 | 0.516444761 |
| 1002 | cg00608876 |  | 17 | 75817377 | 0.090684577 | 0.0006978 | 0.516444761 |
| 1003 | cg10462174 | PIN4 | X | 71462220 | 0.099243881 | 0.00069846 | 0.516444761 |
| 1004 | cg20735988 | PBLD | 10 | 70062188 | 0.06438048 | 0.00069921 | 0.516444761 |
| 1005 | cg13603171 | MOXD1 | 6 | 132723164 | 0.09795329 | 0.00070114 | 0.516444761 |
| 1006 | cg18759081 | COL9A3 | 20 | 61467939 | 0.162743947 | 0.00070136 | 0.516444761 |
| 1007 | cg02951230 | TBC1D22A | 22 | 47509068 | 0.046155359 | 0.00070213 | 0.516444761 |
| 1008 | cg22702259 | RARA | 17 | 38490520 | 0.130421531 | 0.00070246 | 0.516444761 |
| 1009 | cg03610849 |  | 11 | 129080113 | 0.061265165 | 0.00070325 | 0.516444761 |
| 1010 | cg13527921 | NANS | 9 | 100819928 | 0.046322948 | 0.00070325 | 0.516444761 |
| 1011 | cg06362543 |  | 20 | 42135794 | 0.083548708 | 0.00070329 | 0.516444761 |
| 1012 | cg21909090 | PRUNE2 | 9 | 79521848 | 0.083048125 | 0.00070471 | 0.516444761 |
| 1013 | cg05369911 |  | 19 | 52160128 | 0.106194193 | 0.00070623 | 0.516444761 |
| 1014 | cg14274896 | FUCA2 | 6 | 143833011 | 0.072057747 | 0.00070658 | 0.516444761 |
| 1015 | cg12853948 | LOC102724467 | 16 | 87811438 | 0.077974745 | 0.00070714 | 0.516444761 |
| 1016 | cg23243277 | CRYBA2 | 2 | 219856323 | 0.058618771 | 0.00070916 | 0.516444761 |
| 1017 | cg18454954 | H19 | 11 | 2020537 | 0.057825148 | 0.00070973 | 0.516444761 |
| 1018 | cg24042814 | NDUFA13 | 19 | 19626760 | 0.069658174 | 0.00071053 | 0.516444761 |
| 1019 | cg10031769 | CREM | 10 | 35483963 | 0.097059161 | 0.00071171 | 0.516444761 |
| 1020 | cg05611670 |  | 19 | 42434385 | 0.161675154 | 0.00071195 | 0.516444761 |
| 1021 | cg00126148 |  | 4 | 111533517 | 0.078916008 | 0.00071231 | 0.516444761 |
| 1022 | cg18314017 | SFXN3 | 10 | 102789993 | 0.118673825 | 0.00071245 | 0.516444761 |
| 1023 | cg18278420 | ACAD8 | 11 | 134128612 | 0.100703442 | 0.00071354 | 0.516444761 |
| 1024 | cg11357138 |  | 5 | 1796862 | 0.050908876 | 0.00071374 | 0.516444761 |
| 1025 | cg20304956 | MRPS28 | 8 | 80911458 | 0.209140216 | 0.00071377 | 0.516444761 |
| 1026 | cg09241647 |  | X | 49605427 | 0.093707697 | 0.00071402 | 0.516444761 |
| 1027 | cg06695761 | SGCE | 7 | 94286526 | 0.039458878 | 0.00071523 | 0.516444761 |
| 1028 | cg21994360 | PVRIG2P | 7 | 99950632 | 0.043814819 | 0.00071546 | 0.516444761 |
| 1029 | cg22459146 | GHSR | 3 | 172167030 | 0.09698647 | 0.00071636 | 0.516444761 |
| 1030 | cg12715213 |  | 6 | 99275622 | 0.027601725 | 0.00071657 | 0.516444761 |
| 1031 | cg07007336 |  | 3 | 191676782 | 0.098342592 | 0.00071735 | 0.516444761 |
| 1032 | cg12589387 | YTHDF1 | 20 | 61848140 | 0.065589603 | 0.00071798 | 0.516444761 |
| 1033 | cg09448460 |  | 2 | 207129158 | 0.094200221 | 0.0007194 | 0.516444761 |
| 1034 | cg21096803 | TRPM1 | 15 | 31363904 | 0.075958475 | 0.00071969 | 0.516444761 |
| 1035 | cg25000600 | DNAH2 | 17 | 7621545 | 0.068864437 | 0.00071974 | 0.516444761 |
| 1036 | cg16552160 |  | 17 | 78961843 | 0.090315874 | 0.00072154 | 0.51719011 |
| 1037 | cg10607422 |  | 8 | 46948451 | 0.073533154 | 0.00072217 | 0.51719011 |
| 1038 | cg17705128 | FUT6 | 19 | 5838902 | 0.136096369 | 0.00072333 | 0.517232919 |
| 1039 | cg12287702 | DIDO1 | 20 | 61544510 | 0.11099067 | 0.00072386 | 0.517232919 |
| 1040 | cg25310700 | ASB13 | 10 | 5702083 | 0.117558768 | 0.00072515 | 0.517232919 |
| 1041 | cg00160780 | NRGN | 11 | 124611639 | 0.061733112 | 0.0007257 | 0.517232919 |
| 1042 | cg07831397 | SLC17A7 | 19 | 49945682 | 0.058852735 | 0.00072572 | 0.517232919 |
| 1043 | cg03146377 | MLLT1 | 19 | 6230665 | 0.038169339 | 0.00072826 | 0.518162081 |
| 1044 | cg07440077 |  | 16 | 88606229 | 0.071721508 | 0.00072942 | 0.518162081 |
| 1045 | cg24406344 | NEURL3 | 2 | 97167519 | 0.037235026 | 0.00072986 | 0.518162081 |
| 1046 | cg21518268 |  | 8 | 81124468 | 0.079909001 | 0.00073012 | 0.518162081 |
| 1047 | cg26020015 | ZNF560 | 19 | 9610147 | 0.048008583 | 0.00073131 | 0.518162081 |
| 1048 | cg03574672 | FUNDC1 | X | 44401588 | 0.140583833 | 0.00073166 | 0.518162081 |
| 1049 | cg01013171 |  | 14 | 75716369 | 0.039365573 | 0.0007319 | 0.518162081 |
| 1050 | cg09393551 | HEATR5A | 14 | 31764703 | 0.064264404 | 0.00073346 | 0.518770733 |
| 1051 | cg22425467 | TRIM15 | 6 | 30131189 | 0.107587505 | 0.00073456 | 0.51905328 |
| 1052 | cg02348830 | TREX1 | 3 | 48506168 | 0.045467759 | 0.00073558 | 0.519268082 |
| 1053 | cg01243924 | CNTN2 | 1 | 205038785 | 0.08894017 | 0.00073723 | 0.519268082 |
| 1054 | cg00042688 | NYX | X | 41331272 | 0.192587835 | 0.00073846 | 0.519268082 |
| 1055 | cg12415940 |  | 13 | 80349790 | 0.139108404 | 0.00073934 | 0.519268082 |
| 1056 | cg11805976 |  | 1 | 212641410 | 0.123961871 | 0.00073956 | 0.519268082 |
| 1057 | cg02489379 | SP100 | 2 | 231409567 | 0.043743017 | 0.00074081 | 0.519268082 |
| 1058 | cg00649425 | SIK3 | 11 | 116761535 | 0.076717658 | 0.00074092 | 0.519268082 |
| 1059 | cg14206576 |  | 15 | 37112893 | 0.084271206 | 0.00074192 | 0.519268082 |
| 1060 | cg21509819 | GPR108 | 19 | 6737662 | 0.037151182 | 0.00074395 | 0.519268082 |
| 1061 | cg17282204 |  | 22 | 18955907 | 0.055895421 | 0.00074496 | 0.519268082 |
| 1062 | cg22486366 |  | 1 | 20479732 | 0.181532311 | 0.00074568 | 0.519268082 |
| 1063 | cg14366347 | COL18A1 | 21 | 46838309 | 0.071999777 | 0.0007459 | 0.519268082 |
| 1064 | cg03354717 | LONP2 | 16 | 48277879 | 0.090099946 | 0.00074736 | 0.519268082 |
| 1065 | cg22013972 | SLC4A3 | 2 | 220496632 | 0.043454874 | 0.00074849 | 0.519268082 |
| 1066 | cg14674634 |  | 10 | 129948933 | 0.06170404 | 0.00074853 | 0.519268082 |
| 1067 | cg25471682 |  | 3 | 48181988 | 0.056133794 | 0.00075033 | 0.519268082 |
| 1068 | cg21938149 |  | 5 | 107746626 | 0.048964557 | 0.00075051 | 0.519268082 |
| 1069 | cg03735202 |  | 4 | 3634581 | 0.0479691 | 0.00075078 | 0.519268082 |
| 1070 | cg00044440 |  | 5 | 138671449 | 0.101818387 | 0.00075091 | 0.519268082 |
| 1071 | cg14123427 | MEG3 | 14 | 101293450 | 0.05099764 | 0.00075214 | 0.519268082 |
| 1072 | cg23864881 | GAS2L2 | 17 | 34079979 | 0.068581039 | 0.00075474 | 0.519268082 |
| 1073 | cg24540730 | AIM1 | 6 | 106972012 | 0.093529479 | 0.00075484 | 0.519268082 |
| 1074 | cg11375865 | MCTP1 | 5 | 94124352 | 0.159966555 | 0.00075541 | 0.519268082 |
| 1075 | cg01799734 | LINGO3 | 19 | 2307592 | 0.07255877 | 0.00075574 | 0.519268082 |
| 1076 | cg14930636 | STC2 | 5 | 172753734 | 0.068823085 | 0.00075878 | 0.519268082 |
| 1077 | cg01002560 | ISPD | 7 | 16460779 | 0.115567497 | 0.00075978 | 0.519268082 |
| 1078 | cg10144643 | GUCY2EP | 11 | 76397088 | 0.076443377 | 0.00076017 | 0.519268082 |
| 1079 | cg27516584 | CYBA | 16 | 88712750 | 0.051553896 | 0.00076149 | 0.519268082 |
| 1080 | cg02105458 |  | 15 | 93653048 | 0.113198277 | 0.00076254 | 0.519268082 |
| 1081 | cg18119056 | CCDC160 | X | 133370772 | 0.135241043 | 0.00076309 | 0.519268082 |
| 1082 | cg19408140 |  | 5 | 2537657 | 0.074057955 | 0.00076341 | 0.519268082 |
| 1083 | cg16320258 | FBXO2 | 1 | 11710429 | 0.044718002 | 0.00076399 | 0.519268082 |
| 1084 | cg03106600 | SURF6 | 9 | 136199944 | 0.042477089 | 0.00076427 | 0.519268082 |
| 1085 | cg12651598 |  | 12 | 114913965 | 0.159750954 | 0.00076444 | 0.519268082 |
| 1086 | cg21901307 | PDE3B | 11 | 14665019 | 0.065107014 | 0.00076526 | 0.519268082 |
| 1087 | cg25164886 |  | 16 | 88700624 | 0.08529155 | 0.00076569 | 0.519268082 |
| 1088 | cg02551604 |  | 5 | 131831745 | 0.081535191 | 0.00076638 | 0.519268082 |
| 1089 | cg08139512 |  | 11 | 20566851 | 0.068629808 | 0.00076726 | 0.519268082 |
| 1090 | cg09377696 | RYR2 | 1 | 237369214 | 0.129898718 | 0.00076835 | 0.519268082 |
| 1091 | cg10062196 |  | 6 | 137808376 | 0.080115694 | 0.00077064 | 0.519268082 |
| 1092 | cg15487402 | CTSD | 11 | 1780137 | 0.101612317 | 0.00077159 | 0.519268082 |
| 1093 | cg15857672 | ARAP1 | 11 | 72423380 | 0.147558941 | 0.00077247 | 0.519268082 |
| 1094 | cg00668453 |  | 19 | 4589703 | 0.067945039 | 0.00077289 | 0.519268082 |
| 1095 | cg20651980 | BCAP31 | X | 152987922 | 0.09333586 | 0.00077311 | 0.519268082 |
| 1096 | cg00083262 |  | 1 | 157125526 | 0.061320158 | 0.00077356 | 0.519268082 |
| 1097 | cg08881796 | VPS53 | 17 | 618545 | 0.048380217 | 0.00077361 | 0.519268082 |
| 1098 | cg21965723 | CLIP2 | 7 | 73800612 | 0.060513958 | 0.00077448 | 0.519268082 |
| 1099 | cg20784750 |  | 5 | 145945298 | 0.125354738 | 0.00077525 | 0.519268082 |
| 1100 | cg02447779 | C16orf58 | 16 | 31505062 | 0.039961484 | 0.0007755 | 0.519268082 |
| 1101 | cg10254082 |  | 7 | 997346 | 0.159173328 | 0.00077775 | 0.519268082 |
| 1102 | cg06053407 | MYT1 | 20 | 62852752 | 0.168060937 | 0.00078115 | 0.519268082 |
| 1103 | cg12825509 | TRA2B | 3 | 185648568 | 0.110611429 | 0.00078145 | 0.519268082 |
| 1104 | cg20727124 | C21orf130 | 21 | 42520659 | 0.324876908 | 0.00078211 | 0.519268082 |
| 1105 | cg06699669 |  | 11 | 70309970 | 0.062997701 | 0.00078218 | 0.519268082 |
| 1106 | cg21436055 |  | 1 | 227746111 | 0.117892638 | 0.00078265 | 0.519268082 |
| 1107 | cg19716018 | RPS15 | 19 | 1438056 | 0.094040146 | 0.00078287 | 0.519268082 |
| 1108 | cg06952809 |  | X | 46763927 | 0.115699743 | 0.00078366 | 0.519268082 |
| 1109 | cg22663791 | RBMS1 | 2 | 161339409 | 0.170655633 | 0.0007876 | 0.519268082 |
| 1110 | cg06277954 |  | 19 | 18057216 | 0.03232985 | 0.0007887 | 0.519268082 |
| 1111 | cg09211952 | ZDHHC19 | 3 | 195938378 | 0.062158658 | 0.00078923 | 0.519268082 |
| 1112 | cg10308858 | IQCE | 7 | 2632080 | 0.028564886 | 0.00078933 | 0.519268082 |
| 1113 | cg22751438 | KIAA1958 | 9 | 115333218 | 0.056985646 | 0.00078936 | 0.519268082 |
| 1114 | cg02288754 | SALL1 | 16 | 51183988 | 0.077914266 | 0.00078959 | 0.519268082 |
| 1115 | cg26677455 |  | 1 | 110689523 | 0.062319631 | 0.00079052 | 0.519268082 |
| 1116 | cg14514751 | GALNT14 | 2 | 31361701 | 0.025284755 | 0.00079187 | 0.519268082 |
| 1117 | cg06744804 | TBC1D24 | 16 | 2550713 | 0.053266246 | 0.00079202 | 0.519268082 |
| 1118 | cg05989795 | LMF1 | 16 | 1021386 | 0.10578396 | 0.00079276 | 0.519268082 |
| 1119 | cg21950072 | IP6K2 | 3 | 48754976 | 0.062790041 | 0.00079303 | 0.519268082 |
| 1120 | cg03781727 |  | 7 | 22007540 | 0.052650144 | 0.00079315 | 0.519268082 |
| 1121 | cg27637363 | CORO6 | 17 | 27945387 | 0.059717693 | 0.00079341 | 0.519268082 |
| 1122 | cg15706604 | CCDC33 | 15 | 74595274 | 0.064249907 | 0.00079437 | 0.519268082 |
| 1123 | cg05269845 |  | 8 | 690059 | 0.158952226 | 0.00079455 | 0.519268082 |
| 1124 | cg07031219 | ADH1C | 4 | 100274565 | 0.050184741 | 0.00079576 | 0.519268082 |
| 1125 | cg24579312 | ADGRG2 | X | 19124523 | 0.094299745 | 0.00079702 | 0.519268082 |
| 1126 | cg08669010 | MARK2 | 11 | 63676370 | 0.059518039 | 0.00079707 | 0.519268082 |
| 1127 | cg20893022 | MIR7-3 | 19 | 4769214 | 0.095230159 | 0.00079842 | 0.519268082 |
| 1128 | cg12870936 | SIL1 | 5 | 138374953 | 0.098182169 | 0.00079894 | 0.519268082 |
| 1129 | cg01541814 | RNF135 | 17 | 29298591 | 0.047872141 | 0.00080002 | 0.519268082 |
| 1130 | cg17930583 | GABBR1 | 6 | 29591082 | 0.067459483 | 0.00080003 | 0.519268082 |
| 1131 | cg06965941 | SH3KBP1 | X | 19769787 | 0.096383559 | 0.00080106 | 0.519268082 |
| 1132 | cg20013920 | TBCD | 17 | 80809645 | 0.085753965 | 0.00080151 | 0.519268082 |
| 1133 | cg07810469 |  | 4 | 188140222 | 0.153655547 | 0.00080214 | 0.519268082 |
| 1134 | cg03564573 | HMGN2 | 1 | 26798737 | 0.034130022 | 0.00080461 | 0.519268082 |
| 1135 | cg11409205 | TMEM106C | 12 | 48357772 | 0.078750419 | 0.00080577 | 0.519268082 |
| 1136 | cg06837981 | NDST3 | 4 | 119093021 | 0.121890178 | 0.00080606 | 0.519268082 |
| 1137 | cg23725323 |  | X | 20163796 | 0.18657845 | 0.00080777 | 0.519268082 |
| 1138 | cg26739647 | APPL2 | 12 | 105625526 | 0.0999351 | 0.00080793 | 0.519268082 |
| 1139 | cg16193078 | TUBA8 | 22 | 18603321 | 0.102096808 | 0.00080857 | 0.519268082 |
| 1140 | cg07227123 | BCS1L | 2 | 219524978 | 0.072026627 | 0.00080868 | 0.519268082 |
| 1141 | cg22132508 |  | 3 | 138658878 | 0.074848438 | 0.00080934 | 0.519268082 |
| 1142 | cg16636110 | ZNF264 | 19 | 57702479 | 0.114706049 | 0.00081055 | 0.519268082 |
| 1143 | cg12868583 | PNPLA3 | 22 | 44320504 | 0.101261696 | 0.00081382 | 0.519268082 |
| 1144 | cg10504000 | CD81 | 11 | 2402391 | 0.134713392 | 0.00081485 | 0.519268082 |
| 1145 | cg12412427 |  | 11 | 119194512 | 0.088659595 | 0.00081525 | 0.519268082 |
| 1146 | cg26806016 | EIF4G3 | 1 | 21307656 | 0.03119191 | 0.00081553 | 0.519268082 |
| 1147 | cg06638769 | TBL1X | X | 9620321 | 0.117307573 | 0.00081674 | 0.519268082 |
| 1148 | cg20446641 | PELI3 | 11 | 66243077 | 0.079771618 | 0.00081727 | 0.519268082 |
| 1149 | cg05026186 | ABLIM3 | 5 | 148520876 | 0.092377489 | 0.00081759 | 0.519268082 |
| 1150 | cg16063925 |  | 7 | 5120418 | 0.139861421 | 0.00081763 | 0.519268082 |
| 1151 | cg02671281 | FGD3 | 9 | 95783395 | 0.226035962 | 0.00081823 | 0.519268082 |
| 1152 | cg21611056 | CDC25B | 20 | 3776172 | 0.041166194 | 0.00081839 | 0.519268082 |
| 1153 | cg17787237 | CRIM1 | 2 | 36705533 | 0.32913273 | 0.00081882 | 0.519268082 |
| 1154 | cg14334794 | CAMP | 3 | 48263883 | 0.049622804 | 0.00081973 | 0.519268082 |
| 1155 | cg10622068 | TACC2 | 10 | 123748617 | 0.059338076 | 0.00082045 | 0.519268082 |
| 1156 | cg01177664 | PNPLA4 | X | 7895132 | 0.030056633 | 0.00082178 | 0.519268082 |
| 1157 | cg17330458 |  | X | 152707678 | 0.13889687 | 0.00082187 | 0.519268082 |
| 1158 | cg27365324 |  | 15 | 40727743 | 0.107343448 | 0.00082225 | 0.519268082 |
| 1159 | cg02370418 |  | 7 | 1681108 | 0.09129457 | 0.00082569 | 0.519268082 |
| 1160 | cg08968636 |  | 16 | 68273590 | 0.084375673 | 0.00082613 | 0.519268082 |
| 1161 | cg22247041 |  | 17 | 73004677 | 0.099313528 | 0.00082653 | 0.519268082 |
| 1162 | cg11950982 |  | 21 | 46269126 | 0.077986774 | 0.00082664 | 0.519268082 |
| 1163 | cg19895786 | SLC30A2 | 1 | 26373006 | 0.079686631 | 0.00082822 | 0.519268082 |
| 1164 | cg17106100 |  | 2 | 23314925 | 0.106333726 | 0.00082942 | 0.519268082 |
| 1165 | cg20592391 | AP3B2 | 15 | 83332087 | 0.061078508 | 0.00082949 | 0.519268082 |
| 1166 | cg00986957 |  | 13 | 111672573 | 0.041001174 | 0.00083015 | 0.519268082 |
| 1167 | cg06018119 | MAPK11 | 22 | 50706650 | 0.119983957 | 0.00083036 | 0.519268082 |
| 1168 | cg13491003 | TUBD1 | 17 | 57948101 | 0.263079748 | 0.00083051 | 0.519268082 |
| 1169 | cg25149551 | C1orf92 | 1 | 156897062 | 0.055876525 | 0.00083057 | 0.519268082 |
| 1170 | cg02798801 | BUD31 | 7 | 99005263 | 0.124720935 | 0.00083272 | 0.519268082 |
| 1171 | cg00912149 | AANAT | 17 | 74449810 | 0.092922514 | 0.0008331 | 0.519268082 |
| 1172 | cg07029277 | TSC22D1 | 13 | 45150537 | 0.039791259 | 0.00083348 | 0.519268082 |
| 1173 | cg04133879 | SMAD3 | 15 | 67478138 | 0.126850082 | 0.00083431 | 0.519268082 |
| 1174 | cg11104712 | C17orf61 | 17 | 7306613 | 0.066924003 | 0.00083496 | 0.519268082 |
| 1175 | cg18458509 | SLC22A18AS | 11 | 2920189 | 0.041206196 | 0.00083502 | 0.519268082 |
| 1176 | cg12530222 | LSP1 | 11 | 1889178 | 0.050883659 | 0.00083539 | 0.519268082 |
| 1177 | cg27513586 | SNORD115-48 | 15 | 25513654 | 0.067579595 | 0.00083547 | 0.519268082 |
| 1178 | cg17841572 | GNAS | 20 | 57426368 | 0.056956168 | 0.00083577 | 0.519268082 |
| 1179 | cg27087228 |  | 6 | 167321668 | 0.069014925 | 0.00083605 | 0.519268082 |
| 1180 | cg09513647 | PARD3 | 10 | 34702996 | 0.090091918 | 0.00083613 | 0.519268082 |
| 1181 | cg00099350 | ATP2B4 | 1 | 203651920 | 0.062020664 | 0.000838 | 0.519268082 |
| 1182 | cg12744300 | TRAPPC9 | 8 | 141351456 | 0.061261894 | 0.00083895 | 0.519268082 |
| 1183 | cg11836403 |  | 16 | 4821975 | 0.088287357 | 0.00083952 | 0.519268082 |
| 1184 | cg11613643 | LAMA5 | 20 | 60904282 | 0.078463261 | 0.00083976 | 0.519268082 |
| 1185 | cg00411097 | TMEM184A | 7 | 1596050 | 0.0708513 | 0.00083998 | 0.519268082 |
| 1186 | cg01174752 | ZFPM1 | 16 | 88554846 | 0.077528057 | 0.00084033 | 0.519268082 |
| 1187 | cg24806434 |  | 17 | 73855075 | 0.089936156 | 0.00084045 | 0.519268082 |
| 1188 | cg09609106 | SOX13 | 1 | 204062352 | 0.162103429 | 0.00084058 | 0.519268082 |
| 1189 | cg13408026 |  | 13 | 50208909 | 0.109206728 | 0.00084098 | 0.519268082 |
| 1190 | cg10019301 | LCT | 2 | 136574079 | 0.096948776 | 0.00084107 | 0.519268082 |
| 1191 | cg03947632 |  | 13 | 28404089 | 0.046799787 | 0.00084292 | 0.519268082 |
| 1192 | cg11489779 | STAB2 | 12 | 103980939 | 0.097829598 | 0.00084299 | 0.519268082 |
| 1193 | cg15613757 | CHAT | 10 | 50860514 | 0.124705409 | 0.00084307 | 0.519268082 |
| 1194 | cg08880437 |  | 14 | 67896692 | 0.098723093 | 0.00084393 | 0.519268082 |
| 1195 | cg00411843 |  | X | 139584448 | 0.120608227 | 0.00084506 | 0.519268082 |
| 1196 | cg21097036 | C6orf174 | 6 | 127840640 | 0.051854806 | 0.00084653 | 0.519268082 |
| 1197 | cg14678744 | GRTP1 | 13 | 113987030 | 0.097796771 | 0.00084687 | 0.519268082 |
| 1198 | cg23480091 | CDCP2 | 1 | 54605583 | 0.042185146 | 0.00084783 | 0.519268082 |
| 1199 | cg02841912 | SYNE1 | 6 | 152955983 | 0.147620605 | 0.00084852 | 0.519268082 |
| 1200 | cg26493854 | RNASET2 | 6 | 167370786 | 0.055295246 | 0.00084865 | 0.519268082 |
| 1201 | cg03781409 |  | 6 | 94495225 | 0.157805388 | 0.00084876 | 0.519268082 |
| 1202 | cg18141830 | SLC35D3 | 6 | 137242085 | 0.044311266 | 0.00084908 | 0.519268082 |
| 1203 | cg09703824 | IRS4 | X | 107976020 | 0.129642048 | 0.0008506 | 0.519268082 |
| 1204 | cg08622435 | UCK2 | 1 | 165870090 | 0.126159094 | 0.00085376 | 0.519268082 |
| 1205 | cg02663352 | CD44 | 11 | 35167041 | 0.190008573 | 0.0008539 | 0.519268082 |
| 1206 | cg20477012 |  | 17 | 65285749 | 0.057249016 | 0.00085467 | 0.519268082 |
| 1207 | cg19398487 | SCN2A | 2 | 166149712 | 0.107779735 | 0.00085513 | 0.519268082 |
| 1208 | cg00690270 | GLYCTK | 3 | 52324148 | 0.063408328 | 0.00085603 | 0.519268082 |
| 1209 | cg17286076 | PLEKHA2 | 8 | 38785410 | 0.182094305 | 0.00085604 | 0.519268082 |
| 1210 | cg21508541 | SERTAD2 | 2 | 64881291 | 0.037657045 | 0.00085611 | 0.519268082 |
| 1211 | cg14850739 | CDYL | 6 | 4806326 | 0.147851314 | 0.00085613 | 0.519268082 |
| 1212 | cg21677976 |  | 5 | 170171486 | 0.039261851 | 0.00085634 | 0.519268082 |
| 1213 | cg06871876 | TMEM108 | 3 | 132856289 | -0.07913471 | 0.0008583 | 0.519268082 |
| 1214 | cg25804044 | ZBTB12 | 6 | 31870970 | 0.178620609 | 0.00085887 | 0.519268082 |
| 1215 | cg15000966 | NT5C | 17 | 73128123 | 0.027697561 | 0.00085907 | 0.519268082 |
| 1216 | cg09729663 | PPAP2C | 19 | 282899 | 0.060867827 | 0.00086102 | 0.519268082 |
| 1217 | cg15773755 | BTBD2 | 19 | 1998801 | 0.049972497 | 0.00086108 | 0.519268082 |
| 1218 | cg08477599 | KIAA1949 | 6 | 30654827 | 0.043367706 | 0.00086165 | 0.519268082 |
| 1219 | cg23746600 | IGF2R | 6 | 160403181 | 0.104657473 | 0.00086214 | 0.519268082 |
| 1220 | cg01115380 |  | 6 | 1552904 | 0.172474897 | 0.00086216 | 0.519268082 |
| 1221 | cg25679766 |  | 6 | 28558113 | 0.078745791 | 0.00086276 | 0.519268082 |
| 1222 | cg13546538 | CTNNAL1 | 9 | 111754815 | 0.085860929 | 0.000863 | 0.519268082 |
| 1223 | cg16216907 | GLI3 | 7 | 42267430 | 0.082351497 | 0.00086369 | 0.519268082 |
| 1224 | cg04198678 |  | 11 | 8202221 | 0.117532876 | 0.00086371 | 0.519268082 |
| 1225 | cg26315233 | PHTF2 | 7 | 77569962 | 0.12773897 | 0.00086385 | 0.519268082 |
| 1226 | cg06831915 | CPAMD8 | 19 | 17036137 | 0.04014968 | 0.00086406 | 0.519268082 |
| 1227 | cg13873230 | PLXNA2 | 1 | 208255817 | 0.054693904 | 0.00086541 | 0.519268082 |
| 1228 | cg03408433 | CMKLR1 | 12 | 108733370 | 0.06796789 | 0.00086564 | 0.519268082 |
| 1229 | cg00841760 | PTPRN2 | 7 | 158362966 | -0.063906988 | 0.00086583 | 0.519268082 |
| 1230 | cg05536782 | COLEC11 | 2 | 3676611 | 0.136554402 | 0.00086599 | 0.519268082 |
| 1231 | cg19586702 |  | 12 | 88178203 | 0.044961038 | 0.000866 | 0.519268082 |
| 1232 | cg04303330 | IL13 | 5 | 131992430 | 0.101797464 | 0.00086639 | 0.519268082 |
| 1233 | cg13325666 | MLLT4 | 6 | 168227843 | 0.033445794 | 0.00086676 | 0.519268082 |
| 1234 | cg15067907 | FUT6 | 19 | 5838779 | 0.089173857 | 0.00086718 | 0.519268082 |
| 1235 | cg18965179 | CUX1 | 7 | 101500514 | 0.036271425 | 0.00086723 | 0.519268082 |
| 1236 | cg18515426 |  | 10 | 114981606 | 0.099030534 | 0.00086757 | 0.519268082 |
| 1237 | cg01423355 | CD63 | 12 | 56124040 | 0.029507489 | 0.00086762 | 0.519268082 |
| 1238 | cg22401824 |  | 7 | 66359720 | 0.064944577 | 0.00086854 | 0.519268082 |
| 1239 | cg27494497 | TBX20 | 7 | 35293080 | 0.073904355 | 0.0008694 | 0.519268082 |
| 1240 | cg09358366 | SKOR2 | 18 | 44776899 | 0.088702149 | 0.00086982 | 0.519268082 |
| 1241 | cg11370748 | FBXO5 | 6 | 153296563 | 0.076666298 | 0.00087211 | 0.519268082 |
| 1242 | cg12911589 | GAL3ST2 | 2 | 242740765 | 0.037645505 | 0.00087253 | 0.519268082 |
| 1243 | cg23399279 |  | 14 | 69203665 | 0.047070247 | 0.0008733 | 0.519268082 |
| 1244 | cg27510440 |  | X | 152782523 | 0.064220188 | 0.00087338 | 0.519268082 |
| 1245 | cg10042293 | DAGLA | 11 | 61507086 | 0.03833436 | 0.00087358 | 0.519268082 |
| 1246 | cg24047802 | CAPN2 | 1 | 223936343 | 0.075847086 | 0.00087394 | 0.519268082 |
| 1247 | cg09221709 | ERICH1 | 8 | 622011 | -0.044409186 | 0.0008747 | 0.519268082 |
| 1248 | cg22884082 | C6orf162 | 6 | 88039023 | 0.062360351 | 0.0008759 | 0.519268082 |
| 1249 | cg24504954 | FHIT | 3 | 61237217 | 0.058573004 | 0.000876 | 0.519268082 |
| 1250 | cg06047881 | GNAS | 20 | 57465132 | 0.053542007 | 0.00087651 | 0.519268082 |
| 1251 | cg15680465 | MUC17 | 7 | 100701517 | 0.157626048 | 0.00087666 | 0.519268082 |
| 1252 | cg11418237 | POU3F4 | X | 82762423 | 0.129002911 | 0.00087767 | 0.519268082 |
| 1253 | cg10426893 | SMPD3 | 16 | 68482821 | 0.068515315 | 0.00087877 | 0.519268082 |
| 1254 | cg09452478 |  | 11 | 2022386 | 0.059637752 | 0.00087903 | 0.519268082 |
| 1255 | cg04159420 | SORCS3 | 10 | 106402908 | 0.073661225 | 0.00088021 | 0.519268082 |
| 1256 | cg05853285 |  | 11 | 44339621 | 0.054774855 | 0.00088055 | 0.519268082 |
| 1257 | cg08168090 |  | 19 | 5861623 | 0.04640271 | 0.00088075 | 0.519268082 |
| 1258 | cg12375324 | ROBO3 | 11 | 124734028 | 0.09530414 | 0.00088079 | 0.519268082 |
| 1259 | cg27316956 | SYNE1 | 6 | 152958899 | 0.118130546 | 0.00088149 | 0.519268082 |
| 1260 | cg07569194 | GSTM4 | 1 | 110200960 | 0.052519991 | 0.00088393 | 0.519268082 |
| 1261 | cg26549480 | PEBP4 | 8 | 22706063 | 0.062860401 | 0.00088425 | 0.519268082 |
| 1262 | cg19227561 | CCDC120 | X | 48915352 | 0.109209624 | 0.00088468 | 0.519268082 |
| 1263 | cg16228392 | TCTE1 | 6 | 44254126 | 0.124775279 | 0.00088492 | 0.519268082 |
| 1264 | cg13445891 | SMOX | 20 | 4155144 | 0.04624565 | 0.00088613 | 0.519268082 |
| 1265 | cg14660776 | GNASAS | 20 | 57426138 | 0.051955008 | 0.00088637 | 0.519268082 |
| 1266 | cg19328649 | GNA13 | 17 | 63053432 | 0.058168169 | 0.00088655 | 0.519268082 |
| 1267 | cg27086028 | SHANK1 | 19 | 51170137 | 0.068673406 | 0.00088767 | 0.519268082 |
| 1268 | cg18476582 | LOC100130691 | 2 | 178200127 | 0.136760595 | 0.00088774 | 0.519268082 |
| 1269 | cg06989393 | LINC01250 | 2 | 3080704 | 0.126614902 | 0.0008889 | 0.519268082 |
| 1270 | cg12675194 |  | 11 | 129118861 | 0.127988586 | 0.0008889 | 0.519268082 |
| 1271 | cg04106649 |  | 8 | 43402930 | 0.031934347 | 0.00088933 | 0.519268082 |
| 1272 | cg05782377 | C1orf187 | 1 | 11760856 | 0.143825282 | 0.00088939 | 0.519268082 |
| 1273 | cg19497367 |  | 5 | 54082342 | 0.141605923 | 0.00089144 | 0.520054672 |
| 1274 | cg11834152 | DOCK3 | 3 | 51063126 | 0.093638762 | 0.00089318 | 0.520084817 |
| 1275 | cg23780614 | WNT5A | 3 | 55521780 | 0.056148841 | 0.00089336 | 0.520084817 |
| 1276 | cg01203948 | CDK16 | X | 47076559 | 0.105387055 | 0.00089558 | 0.520084817 |
| 1277 | cg17710091 |  | 1 | 48154068 | 0.078866613 | 0.00089612 | 0.520084817 |
| 1278 | cg04352404 |  | 11 | 134771660 | 0.087488615 | 0.00089627 | 0.520084817 |
| 1279 | cg18739821 | HS3ST3B1 | 17 | 14212399 | 0.062384494 | 0.00089641 | 0.520084817 |
| 1280 | cg13222145 | RFX4 | 12 | 107130368 | 0.083320881 | 0.00089957 | 0.520084817 |
| 1281 | cg01900480 |  | 5 | 139068516 | 0.106884883 | 0.00089989 | 0.520084817 |
| 1282 | cg08804013 | NFAT5 | 16 | 69600791 | 0.031134317 | 0.00090064 | 0.520084817 |
| 1283 | cg13867206 |  | 17 | 46705900 | 0.105677516 | 0.0009007 | 0.520084817 |
| 1284 | cg15995592 | MARCH7 | 2 | 160614976 | 0.130489726 | 0.000901 | 0.520084817 |
| 1285 | cg08420981 | SH3PXD2A | 10 | 105490520 | 0.085306435 | 0.00090152 | 0.520084817 |
| 1286 | cg16296829 | KCNN3 | 1 | 154832535 | 0.118147908 | 0.00090198 | 0.520084817 |
| 1287 | cg12993848 |  | 14 | 42848407 | 0.084525305 | 0.00090275 | 0.520084817 |
| 1288 | cg06615152 | AMH | 19 | 2250561 | 0.137190766 | 0.00090326 | 0.520084817 |
| 1289 | cg00333843 | MAF | 16 | 79627884 | 0.070921808 | 0.00090328 | 0.520084817 |
| 1290 | cg20519044 | SLC7A11-AS1 | 4 | 139009110 | 0.068213394 | 0.00090339 | 0.520084817 |
| 1291 | cg23176399 | MEG3 | 14 | 101292643 | 0.049953007 | 0.00090597 | 0.520699632 |
| 1292 | cg01867031 | KCNQ1 | 11 | 2534517 | 0.138002796 | 0.00090713 | 0.520699632 |
| 1293 | cg17819155 | UCP2 | 11 | 73695045 | 0.105234514 | 0.00090729 | 0.520699632 |
| 1294 | cg24448969 | HMX2 | 10 | 124906930 | 0.079348434 | 0.00090862 | 0.520699632 |
| 1295 | cg03912703 | BTBD19 | 1 | 45279349 | 0.063394277 | 0.0009108 | 0.520699632 |
| 1296 | cg13605615 | DIRAS3 | 1 | 68517255 | 0.064088338 | 0.00091084 | 0.520699632 |
| 1297 | cg22143324 | CD82 | 11 | 44618358 | 0.111516992 | 0.0009115 | 0.520699632 |
| 1298 | cg23492309 | LINC01140 | 1 | 87595276 | 0.129234164 | 0.00091151 | 0.520699632 |
| 1299 | cg00975605 | HRNBP3 | 17 | 77102365 | 0.045026672 | 0.0009117 | 0.520699632 |
| 1300 | cg01293143 | TCEA2 | 20 | 62688326 | 0.065944003 | 0.00091174 | 0.520699632 |
| 1301 | cg03181644 | EXOC7 | 17 | 74090419 | 0.0652989 | 0.00091258 | 0.520699632 |
| 1302 | cg06282446 | PCDHA1 | 5 | 140174554 | 0.11882357 | 0.00091287 | 0.520699632 |
| 1303 | cg06399135 | SLC8A2 | 19 | 47951565 | 0.048985403 | 0.00091404 | 0.520809637 |
| 1304 | cg23095243 |  | 14 | 32435490 | 0.148745215 | 0.00091447 | 0.520809637 |
| 1305 | cg10680836 | NCRNA00171 | 6 | 30029120 | 0.037078117 | 0.00091557 | 0.52081007 |
| 1306 | cg22635885 | CTPS2 | X | 16729564 | 0.186062948 | 0.00091695 | 0.52081007 |
| 1307 | cg01220513 | SH3KBP1 | X | 19902129 | 0.160718723 | 0.00091702 | 0.52081007 |
| 1308 | cg00461060 | GALNT9 | 12 | 132826769 | 0.023060887 | 0.00091843 | 0.52081007 |
| 1309 | cg27421742 | TRPM5 | 11 | 2441141 | 0.052101988 | 0.00092018 | 0.52081007 |
| 1310 | cg27069150 |  | 19 | 28265629 | 0.033776711 | 0.00092043 | 0.52081007 |
| 1311 | cg12057242 | CPSF3 | 2 | 9603687 | 0.118514532 | 0.00092121 | 0.52081007 |
| 1312 | cg17811241 |  | 1 | 187054539 | 0.144138101 | 0.00092156 | 0.52081007 |
| 1313 | cg20036711 | LATS2 | 13 | 21622707 | 0.066028815 | 0.00092382 | 0.52081007 |
| 1314 | cg01589972 | PRR36 | 19 | 7939904 | 0.091480428 | 0.0009259 | 0.52081007 |
| 1315 | cg13911052 |  | 2 | 176978909 | 0.101266878 | 0.00092624 | 0.52081007 |
| 1316 | cg05864097 |  | 16 | 85461981 | 0.052166723 | 0.00092687 | 0.52081007 |
| 1317 | cg04561231 |  | 12 | 27016635 | 0.066638167 | 0.00092746 | 0.52081007 |
| 1318 | cg13805654 |  | 2 | 233388287 | 0.093075523 | 0.00092747 | 0.52081007 |
| 1319 | cg26522278 | MADCAM1 | 19 | 496296 | 0.031921419 | 0.00092801 | 0.52081007 |
| 1320 | cg08292023 | GRM5 | 11 | 88242253 | 0.0443558 | 0.00092912 | 0.52081007 |
| 1321 | cg04902302 |  | 2 | 175594739 | 0.064319715 | 0.00092916 | 0.52081007 |
| 1322 | cg15433497 | ZNF57 | 19 | 2906331 | 0.062940247 | 0.00092966 | 0.52081007 |
| 1323 | cg19579446 | UBE2L6 | 11 | 57335474 | 0.047241751 | 0.00093041 | 0.52081007 |
| 1324 | cg01248347 | TMEM215 | 9 | 32782655 | 0.077685073 | 0.00093168 | 0.52081007 |
| 1325 | cg17240538 | SCD5 | 4 | 83660759 | 0.087070583 | 0.00093175 | 0.52081007 |
| 1326 | cg17608911 | ZNF611 | 19 | 53237411 | 0.081033581 | 0.00093214 | 0.52081007 |
| 1327 | cg22165522 |  | 14 | 22930883 | 0.068094777 | 0.00093312 | 0.52081007 |
| 1328 | cg27174438 | EMX2 | 10 | 119304708 | 0.05090761 | 0.00093328 | 0.52081007 |
| 1329 | cg13028324 | EP300 | 22 | 41501680 | 0.19838482 | 0.00093331 | 0.52081007 |
| 1330 | cg19727801 | PCDHB19P | 5 | 140619446 | 0.10925158 | 0.00093364 | 0.52081007 |
| 1331 | cg13415073 |  | 15 | 53095823 | 0.051596848 | 0.00093493 | 0.52081007 |
| 1332 | cg02620005 | FAM65B | 6 | 24858932 | 0.078997582 | 0.0009354 | 0.52081007 |
| 1333 | cg04418999 | MDH2 | 7 | 75681181 | 0.253727896 | 0.0009359 | 0.52081007 |
| 1334 | cg13747876 | SLC16A3 | 17 | 80195402 | 0.087719366 | 0.00093831 | 0.52081007 |
| 1335 | cg16286597 | MAST3 | 19 | 18210172 | 0.032974243 | 0.00093868 | 0.52081007 |
| 1336 | cg26103863 | CRLF3 | 17 | 29152249 | 0.04628522 | 0.00093896 | 0.52081007 |
| 1337 | cg03470837 | GABBR2 | 9 | 101251353 | 0.085564228 | 0.00093943 | 0.52081007 |
| 1338 | cg13946949 | PLXNC1 | 12 | 94676369 | 0.110147911 | 0.00093948 | 0.52081007 |
| 1339 | cg06202614 | LINC00607 | 2 | 216696255 | 0.247384203 | 0.0009396 | 0.52081007 |
| 1340 | cg22070650 | MADD | 11 | 47293792 | 0.141913795 | 0.00094275 | 0.52081007 |
| 1341 | cg00165619 | EPHA8 | 1 | 22903087 | 0.061060144 | 0.00094321 | 0.52081007 |
| 1342 | cg11753750 | UNC84B | 22 | 39147792 | 0.163134389 | 0.00094449 | 0.52081007 |
| 1343 | cg24633656 | COL9A3 | 20 | 61447194 | 0.105148987 | 0.00094551 | 0.52081007 |
| 1344 | cg11148212 |  | X | 40163642 | 0.09757485 | 0.00094583 | 0.52081007 |
| 1345 | cg22846611 | LPIN3 | 20 | 39969379 | 0.035888842 | 0.00094611 | 0.52081007 |
| 1346 | cg18885210 |  | 2 | 121516533 | 0.03863103 | 0.00094649 | 0.52081007 |
| 1347 | cg12575928 | GAS2 | 11 | 22687660 | 0.164731473 | 0.00094694 | 0.52081007 |
| 1348 | cg21621225 |  | 12 | 79197222 | 0.060387127 | 0.0009473 | 0.52081007 |
| 1349 | cg24539692 | ECSCR | 5 | 138837607 | 0.039278688 | 0.00094871 | 0.52081007 |
| 1350 | cg19815574 | DACT3 | 19 | 47152384 | 0.074082925 | 0.00094897 | 0.52081007 |
| 1351 | cg06329143 | SMAD4 | 18 | 48556512 | 0.024885174 | 0.00094953 | 0.52081007 |
| 1352 | cg17504791 |  | 5 | 67466813 | -0.03314295 | 0.00095172 | 0.52081007 |
| 1353 | cg04131468 | RICH2 | 17 | 12694449 | 0.053138436 | 0.00095175 | 0.52081007 |
| 1354 | cg08773689 | B4GALNT3 | 12 | 649625 | 0.129908137 | 0.0009518 | 0.52081007 |
| 1355 | cg03153360 | IL11 | 19 | 55882504 | 0.078181489 | 0.00095262 | 0.52081007 |
| 1356 | cg24332002 | HSPG2 | 1 | 22228582 | 0.08303123 | 0.0009535 | 0.52081007 |
| 1357 | cg08489674 |  | 2 | 119609557 | 0.054373646 | 0.00095729 | 0.52081007 |
| 1358 | cg24666695 |  | 9 | 130007687 | 0.02222104 | 0.00095759 | 0.52081007 |
| 1359 | cg26232940 | DLX3 | 17 | 48073055 | 0.072252253 | 0.00095841 | 0.52081007 |
| 1360 | cg26091142 | ISLR2 | 15 | 74423077 | 0.059765246 | 0.00095841 | 0.52081007 |
| 1361 | cg24428040 | C17orf28 | 17 | 72969293 | 0.082339505 | 0.00095875 | 0.52081007 |
| 1362 | cg10034006 |  | 7 | 155411673 | 0.139895491 | 0.00095959 | 0.52081007 |
| 1363 | cg23754320 |  | 12 | 115135138 | 0.088024902 | 0.00096042 | 0.52081007 |
| 1364 | cg17395714 | TRPC4 | 13 | 38256270 | 0.123885174 | 0.0009608 | 0.52081007 |
| 1365 | cg05033439 |  | 11 | 1365186 | 0.05067313 | 0.00096105 | 0.52081007 |
| 1366 | cg21812470 | CNGA1 | 4 | 48015021 | 0.140187254 | 0.0009612 | 0.52081007 |
| 1367 | cg03214816 | ARHGEF2 | 1 | 155932794 | 0.097638432 | 0.00096157 | 0.52081007 |
| 1368 | cg05608754 |  | 12 | 9496303 | 0.175535851 | 0.00096194 | 0.52081007 |
| 1369 | cg10533624 | TEAD4 | 12 | 3143428 | 0.027187759 | 0.00096247 | 0.52081007 |
| 1370 | cg19811864 | EFNA4 | 1 | 155036142 | 0.030512784 | 0.00096353 | 0.52081007 |
| 1371 | cg07255389 | FOXN3 | 14 | 89776176 | 0.064534342 | 0.00096405 | 0.52081007 |
| 1372 | cg25665203 |  | 2 | 106577910 | 0.078848319 | 0.00096418 | 0.52081007 |
| 1373 | cg24053165 |  | 10 | 102469294 | 0.058404958 | 0.00096475 | 0.52081007 |
| 1374 | cg12941152 |  | 9 | 136027341 | 0.067663594 | 0.00096479 | 0.52081007 |
| 1375 | cg03121508 |  | 6 | 28746317 | 0.08334039 | 0.00096511 | 0.52081007 |
| 1376 | cg03628650 | LINC01065 | 13 | 53726304 | 0.059835947 | 0.00096632 | 0.52081007 |
| 1377 | cg04629595 | CCDC33 | 15 | 74592566 | 0.07859813 | 0.00096771 | 0.52081007 |
| 1378 | cg03408122 | SBF1 | 22 | 50903314 | 0.032840286 | 0.00096803 | 0.52081007 |
| 1379 | cg12755749 | SOGA1 | 20 | 35444851 | 0.040921204 | 0.00096813 | 0.52081007 |
| 1380 | cg06526829 | KCND1 | X | 48828070 | 0.095792117 | 0.00096882 | 0.52081007 |
| 1381 | cg16826739 | INPP5A | 10 | 134544141 | 0.058215028 | 0.00096902 | 0.52081007 |
| 1382 | cg21989239 | CDADC1 | 13 | 49855627 | 0.061545625 | 0.00097026 | 0.52081007 |
| 1383 | cg25428532 |  | X | 147217504 | 0.11912947 | 0.00097085 | 0.52081007 |
| 1384 | cg00495946 | C7orf50 | 7 | 1113932 | 0.098324718 | 0.00097109 | 0.52081007 |
| 1385 | cg19439071 | SNORD1A | 17 | 74557625 | 0.064161631 | 0.00097127 | 0.52081007 |
| 1386 | cg21457129 | CELSR2 | 1 | 109812365 | 0.051588027 | 0.00097416 | 0.521493996 |
| 1387 | cg04743464 |  | 19 | 17139768 | 0.107542457 | 0.0009743 | 0.521493996 |
| 1388 | cg18111733 | EPS8L3 | 1 | 110306809 | 0.157118027 | 0.00097542 | 0.521493996 |
| 1389 | cg04351607 |  | 2 | 181276670 | 0.227608836 | 0.00097678 | 0.521493996 |
| 1390 | cg01187997 | HCCA2 | 11 | 1594830 | 0.077911892 | 0.00097697 | 0.521493996 |
| 1391 | cg13333720 | ATP11C | X | 138908963 | 0.179321778 | 0.00097719 | 0.521493996 |
| 1392 | cg11549716 | USP31 | 16 | 23098488 | 0.066071884 | 0.00097919 | 0.521493996 |
| 1393 | cg08610862 | LHX9 | 1 | 197888469 | 0.076546888 | 0.00097987 | 0.521493996 |
| 1394 | cg25214584 | PAOX | 10 | 135191349 | 0.054388444 | 0.00098087 | 0.521493996 |
| 1395 | cg04283392 | LRRC33 | 3 | 196366369 | 0.059910874 | 0.00098098 | 0.521493996 |
| 1396 | cg23866759 | PCBD2 | 5 | 134241313 | 0.081164318 | 0.00098189 | 0.521493996 |
| 1397 | cg18909389 | CLIC1 | 6 | 31701110 | 0.057361207 | 0.00098211 | 0.521493996 |
| 1398 | cg18139462 | HSPB6 | 19 | 36249212 | 0.056912391 | 0.00098319 | 0.521493996 |
| 1399 | cg05090143 | BEND3 | 6 | 107391332 | 0.046955152 | 0.00098362 | 0.521493996 |
| 1400 | cg18619398 | GNASAS | 20 | 57416506 | 0.044755378 | 0.00098363 | 0.521493996 |
| 1401 | cg24458251 | SLC25A26 | 3 | 66362684 | 0.118647589 | 0.00098378 | 0.521493996 |

**Supplementary Table 4. Differentially correlated genes between patients with AERD and ATA**

| no. | CpG | Gene | Chromosome | Position | deltaBeta | *P* value | Adjusted *P* value | Spearman correlation *P* value | Coefficient | Methylation status | CpG strand |
| --- | --- | --- | --- | --- | --- | --- | --- | --- | --- | --- | --- |
|
| 1 | cg05026186 | ABLIM3 | 5 | 148520876 | 0.092377 | 0.000818 | 0.519268 | 0.66276 | 0.15806 | Hypo | R |
| 2 | cg05108737 | ARMC4 | 10 | 28288291 | 0.080951 | 4.19E-05 | 0.479171 | 0.06025 | -0.62424 | Hypo | R |
| 3 | cg26737850 | BAIAP3 | 16 | 1384991 | 0.068443 | 0.000484 | 0.511585 | 0.13282 | -0.51515 | Hypo | F |
| 4 | cg22895231 | BCAM | 19 | 45311868 | 0.063371 | 0.000631 | 0.512017 | 0.14337 | 0.50303 | Hypo | R |
| 5 | cg11808745 | BUB1 | 2 | 111432970 | 0.092324 | 0.000625 | 0.512017 | 0.0035 | 0.85455 | Hypo | F |
| 6 | cg26621748 | C11orf63 | 11 | 122753109 | 0.100436 | 8.57E-06 | 0.351774 | 0.04403 | -0.66061 | Hypo | F |
| 7 | cg18817560 | C1GALT1C1L | 2 | 43903689 | 0.079273 | 0.000547 | 0.512017 | 0.02117 | -0.73333 | Hypo | F |
| 8 | cg06884882 | C1orf228 | 1 | 45187946 | 0.030106 | 0.000216 | 0.495692 | 0.06647 | -0.61212 | Hypo | R |
| 9 | cg10885338 | C2orf40 | 2 | 106682640 | 0.162641 | 0.000402 | 0.503882 | 0.13282 | -0.51515 | Hypo | F |
| 10 | cg25390334 | C2orf54 | 2 | 241827778 | 0.039594 | 0.000673 | 0.513362 | 0.34885 | 0.33333 | Hypo | R |
| 11 | cg13927228 | C9orf171 | 9 | 135285960 | 0.075275 | 3.75E-05 | 0.45717 | 0.26289 | -0.39394 | Hypo | F |
| 12 | cg18119056 | CCDC160 | X | 133370772 | 0.135241 | 0.000763 | 0.519268 | 0.01165 | -0.78182 | Hypo | R |
| 13 | cg15706604 | CCDC33 | 15 | 74595274 | 0.06425 | 0.000794 | 0.519268 | 0.2956 | -0.3697 | Hypo | F |
| 14 | cg04629595 | CCDC33 | 15 | 74592566 | 0.078598 | 0.000968 | 0.52081 | 0.01841 | -0.74545 | Hypo | R |
| 15 | cg13703804 | CD44 | 11 | 35187061 | 0.080872 | 0.000625 | 0.512017 | 0.08777 | 0.57576 | Hypo | F |
| 16 | cg02663352 | CD44 | 11 | 35167041 | 0.190009 | 0.000854 | 0.519268 | 0.02751 | 0.70909 | Hypo | R |
| 17 | cg21611056 | CDC25B | 20 | 3776172 | 0.041166 | 0.000818 | 0.519268 | 0.03938 | 0.67273 | Hypo | R |
| 18 | cg24208172 | CDS1 | 4 | 85504879 | 0.029894 | 0.000167 | 0.495692 | 0.3128 | -0.35758 | Hypo | R |
| 19 | cg21457129 | CELSR2 | 1 | 109812365 | 0.051588 | 0.000974 | 0.521494 | 0.1043 | 0.55152 | Hypo | R |
| 20 | cg19184708 | CENPN | 16 | 81063835 | 0.071715 | 0.000564 | 0.512017 | 0.13282 | 0.51515 | Hypo | R |
| 21 | cg01743875 | CETN2 | X | 152000554 | 0.127631 | 0.000602 | 0.512017 | 0.27897 | -0.38182 | Hypo | F |
| 22 | cg14366347 | COL18A1 | 21 | 46838309 | 0.072 | 0.000746 | 0.519268 | 0.02117 | 0.73333 | Hypo | R |
| 23 | cg17457514 | CORO2B | 15 | 68908975 | 0.056963 | 0.000588 | 0.512017 | 0.49156 | -0.24848 | Hypo | F |
| 24 | cg13546538 | CTNNAL1 | 9 | 111754815 | 0.085861 | 0.000863 | 0.519268 | 0.27897 | -0.38182 | Hypo | R |
| 25 | cg19062489 | CYP4F22 | 19 | 15662114 | 0.041757 | 0.000172 | 0.495692 | 0.04904 | 0.64848 | Hypo | R |
| 26 | cg10404749 | DMC1 | 22 | 38965841 | 0.102812 | 4.98E-05 | 0.479171 | 0.34885 | 0.33333 | Hypo | F |
| 27 | cg02142098 | DMC1 | 22 | 38965659 | 0.099491 | 0.000267 | 0.496244 | 0.17822 | 0.46667 | Hypo | R |
| 28 | cg25000600 | DNAH2 | 17 | 7621545 | 0.068864 | 0.00072 | 0.516445 | 0.07312 | -0.6 | Hypo | F |
| 29 | cg04833034 | DPYSL3 | 5 | 146832182 | 0.080055 | 0.000514 | 0.512017 | 0.26289 | 0.39394 | Hypo | R |
| 30 | cg15273270 | DTHD1 | 4 | 36324571 | 0.156121 | 0.00054 | 0.512017 | 0.02117 | -0.73333 | Hypo | F |
| 31 | cg26310256 | EGFL6 | X | 13588301 | 0.175029 | 6.00E-05 | 0.479171 | 0.65672 | 0.16364 | Hypo | R |
| 32 | cg01726103 | FAM65B | 6 | 24911615 | 0.046397 | 0.000185 | 0.495692 | 0.19093 | -0.45455 | Hypo | F |
| 33 | cg02620005 | FAM65B | 6 | 24858932 | 0.078998 | 0.000935 | 0.52081 | 0.01367 | -0.7697 | Hypo | F |
| 34 | cg00267512 | FANK1 | 10 | 127584250 | 0.049459 | 0.000283 | 0.496244 | 0.23242 | -0.41818 | Hypo | R |
| 35 | cg01381203 | FOXM1 | 12 | 2985630 | 0.058806 | 0.000611 | 0.512017 | 0.00681 | 0.81818 | Hypo | F |
| 36 | cg24922045 | GAS2L2 | 17 | 34079987 | 0.070054 | 0.000605 | 0.512017 | 0.01367 | -0.7697 | Hypo | R |
| 37 | cg23864881 | GAS2L2 | 17 | 34079979 | 0.068581 | 0.000755 | 0.519268 | 0.13282 | -0.51515 | Hypo | R |
| 38 | cg11850638 | GJB7 | 6 | 88032210 | 0.038728 | 0.000283 | 0.496244 | 0.03938 | -0.67273 | Hypo | R |
| 39 | cg18454954 | H19 | 11 | 2020537 | 0.057825 | 0.00071 | 0.516445 | 0.09717 | 0.55319 | Hypo | R |
| 40 | cg01745499 | HMGA1 | 6 | 34206084 | 0.028132 | 0.000534 | 0.512017 | 0.00681 | 0.81818 | Hypo | F |
| 41 | cg24332002 | HSPG2 | 1 | 22228582 | 0.083031 | 0.000954 | 0.52081 | 0.7072 | 0.13939 | Hypo | F |
| 42 | cg10308858 | IQCE | 7 | 2632080 | 0.028565 | 0.000789 | 0.519268 | 0.13282 | -0.51515 | Hypo | F |
| 43 | cg08814944 | LDLRAD4 | 18 | 13245910 | 0.168579 | 0.00062 | 0.512017 | 0.00556 | -0.8303 | Hypo | F |
| 44 | cg12326700 | LRRC43 | 12 | 122667505 | 0.039439 | 0.000416 | 0.503882 | 0.1043 | -0.55152 | Hypo | R |
| 45 | cg10749572 | LTF | 3 | 46506864 | 0.12233 | 0.000694 | 0.516445 | 0.36768 | 0.32121 | Hypo | F |
| 46 | cg05605944 | MAOB | X | 43741945 | 0.122908 | 0.000119 | 0.495692 | 0.16619 | -0.47417 | Hypo | R |
| 47 | cg22441758 | MAP3K6 | 1 | 27685312 | 0.069482 | 0.000287 | 0.496244 | 0.44827 | 0.27273 | Hypo | F |
| 48 | cg01569388 | MAP6 | 11 | 75303936 | 0.062997 | 0.000542 | 0.512017 | 0.08022 | -0.58788 | Hypo | R |
| 49 | cg03115168 | MMP28 | 17 | 34094046 | 0.047797 | 0.000624 | 0.512017 | 0.19093 | 0.45455 | Hypo | F |
| 50 | cg23303369 | MMP9 | 20 | 44641161 | 0.116682 | 0.000302 | 0.496244 | 0.58354 | 0.2 | Hypo | R |
| 51 | cg13603171 | MOXD1 | 6 | 132723164 | 0.097953 | 0.000701 | 0.516445 | 0.21803 | 0.4303 | Hypo | R |
| 52 | cg18409562 | NAPRT | 8 | 144657636 | 0.074484 | 0.000262 | 0.496244 | 0.08022 | 0.58788 | Hypo | F |
| 53 | cg20413441 | NGFR | 17 | 47588046 | 0.051866 | 0.000318 | 0.496244 | 0.05445 | 0.63636 | Hypo | F |
| 54 | cg00160780 | NRGN | 11 | 124611639 | 0.061733 | 0.000726 | 0.517233 | 0.00984 | 0.79394 | Hypo | F |
| 55 | cg26561943 | PALM | 19 | 719632 | 0.107998 | 2.65E-06 | 0.351774 | 0.75883 | -0.11515 | Hypo | F |
| 56 | cg14831539 | PAX7 | 1 | 18988324 | 0.041727 | 0.000411 | 0.503882 | 0.03114 | -0.69697 | Hypo | R |
| 57 | cg21210376 | PBK | 8 | 27695667 | 0.069303 | 0.000138 | 0.495692 | 0.03509 | 0.68485 | Hypo | F |
| 58 | cg20735988 | PBLD | 10 | 70062188 | 0.06438 | 0.000699 | 0.516445 | 0.02751 | -0.70909 | Hypo | R |
| 59 | cg21909090 | PRUNE2 | 9 | 79521848 | 0.083048 | 0.000705 | 0.516445 | 0.19093 | -0.45455 | Hypo | R |
| 60 | cg00841760 | PTPRN2 | 7 | 158362966 | -0.06391 | 0.000866 | 0.519268 | 0.33055 | 0.34545 | Hypo | F |
| 61 | cg11409620 | RAB36 | 22 | 23487458 | 0.057126 | 0.000588 | 0.512017 | 0.08777 | -0.57576 | Hypo | F |
| 62 | cg00405069 | RAB3B | 1 | 52455390 | 0.093931 | 0.000366 | 0.503882 | 0.01592 | -0.75758 | Hypo | R |
| 63 | cg01111746 | RARG | 12 | 53605391 | 0.082183 | 8.21E-05 | 0.495576 | 0.24737 | 0.40606 | Hypo | F |
| 64 | cg12440152 | RBBP8NL | 20 | 61003859 | 0.116638 | 0.000437 | 0.5082 | 0.02751 | 0.70909 | Hypo | R |
| 65 | cg16315334 | REEP4 | 8 | 21996639 | 0.075085 | 0.000232 | 0.496244 | 0.03938 | 0.67273 | Hypo | R |
| 66 | cg09007977 | RHEBL1 | 12 | 49464993 | 0.069174 | 0.000402 | 0.503882 | 0.16606 | -0.47879 | Hypo | F |
| 67 | cg09766721 | SLC13A3 | 20 | 45237014 | 0.250931 | 0.00038 | 0.503882 | 0.03509 | -0.68485 | Hypo | R |
| 68 | cg07996352 | SLC19A1 | 21 | 46951449 | 0.032832 | 0.000684 | 0.514439 | 0.01367 | 0.7697 | Hypo | R |
| 69 | cg04764584 | SLC9A3 | 5 | 505985 | 0.105885 | 0.000193 | 0.495692 | 0.63197 | 0.17576 | Hypo | F |
| 70 | cg13445891 | SMOX | 20 | 4155144 | 0.046246 | 0.000886 | 0.519268 | 0.04403 | 0.66061 | Hypo | R |
| 71 | cg10426893 | SMPD3 | 16 | 68482821 | 0.068515 | 0.000879 | 0.519268 | 0.00198 | -0.87879 | Hypo | F |
| 72 | cg00961418 | STK33 | 11 | 8616172 | 0.100101 | 0.000407 | 0.503882 | 0.00446 | -0.84242 | Hypo | F |
| 73 | cg07367607 | STX2 | 12 | 131314725 | 0.088207 | 8.41E-05 | 0.495576 | 0.01165 | -0.78182 | Hypo | F |
| 74 | cg02841912 | SYNE1 | 6 | 152955983 | 0.147621 | 0.000849 | 0.519268 | 0.04403 | -0.66061 | Hypo | R |
| 75 | cg27316956 | SYNE1 | 6 | 152958899 | 0.118131 | 0.000881 | 0.519268 | 0.00088 | -0.90303 | Hypo | R |
| 76 | cg16228392 | TCTE1 | 6 | 44254126 | 0.124775 | 0.000885 | 0.519268 | 0.1133 | -0.53939 | Hypo | F |
| 77 | cg10533624 | TEAD4 | 12 | 3143428 | 0.027188 | 0.000962 | 0.52081 | 0.04403 | 0.66061 | Hypo | F |
| 78 | cg03291825 | TK1 | 17 | 76182433 | 0.129255 | 0.000409 | 0.503882 | 0.03509 | 0.68485 | Hypo | F |
| 79 | cg05129081 | TP63 | 3 | 189348936 | 0.128579 | 0.000365 | 0.503882 | 0.21803 | 0.4303 | Hypo | R |
| 80 | cg17082634 | TYRO3 | 15 | 41850503 | 0.074962 | 3.83E-05 | 0.458366 | 0.02274 | 0.70517 | Hypo | F |
| 81 | cg24479524 | UBXN10 | 1 | 20512796 | 0.035058 | 0.000336 | 0.50171 | 0.01165 | -0.78182 | Hypo | F |
| 82 | cg23483069 | VSNL1 | 2 | 17825778 | 0.025902 | 0.000575 | 0.512017 | 0.03451 | 0.6687 | Hypo | R |
| 83 | cg10211252 | ZNF488 | 10 | 48355286 | 0.026152 | 0.000642 | 0.512017 | 0.00521 | 0.80244 | Hypo | R |

**Supplementary Table 5. Asthma-related differentially expressed genes between patients with AERD and ATA**

| **Symbol** | **Synonym(s)** | **Entrez Gene Name** | **Location** | **Family** | **Entrez Gene ID for Human** |
| --- | --- | --- | --- | --- | --- |
| ABLIM3 | actin binding LIM protein family member 3, actin binding LIM protein family, member 3, AW990719, D930036B08RIK, HMFN1661, KIAA0843, RGD1565118 | actin binding LIM protein family member 3 | Cytoplasm | other | 22885 |
| BCAM | 1200005K12Rik, AU, basal cell adhesion molecule, basal cell adhesion molecule (Lutheran blood group), CD239, Gplu, LU, LUTHERAN, Lutheran blood group, MSK19 | basal cell adhesion molecule (Lutheran blood group) | Plasma Membrane | transmembrane receptor | 4059 |
| BUB1 | AL022991, BUB1A, BUB1L, BUB1 mitotic checkpoint serine/threonine kinase, BUB1, mitotic checkpoint serine/threonine kinase, C80208, D2Xrf87, hBUB1 | BUB1 mitotic checkpoint serine/threonine kinase | Nucleus | kinase | 699 |
| CCDC33 | 4930535E21Rik, coiled-coil domain containing 33, CT61, FLJ32855, Gm1117, HP11097, LOC102723673, Tzip1 | coiled-coil domain containing 33 | Cytoplasm | other | 80125 |
| CD44 | 216062 AT, AU023126, AW121933, AW146109, CD44A, CD44 Antigen, CD44 (containing exon 5), Cd44i, CD44 molecule (Indian blood group), CD44 (soluble), CD44 STANDARD FROM, CDW44, CSPG8, ECMR-III, Epican, HCELL, HERMES, Hermes antigen, HUTCH-I, IN, LHR, Ly-24, MC56, MDU2, MDU3, METAA, MIC4, NKT.44, Pgp-1, RHAMM | CD44 molecule (Indian blood group) | Plasma Membrane | other | 960 |
| CDC25B | AI604853, CDC25HU2, cell division cycle 25B | cell division cycle 25B | Nucleus | phosphatase | 994 |
| CDH13 | 4932416G01Rik, CADHERIN 13, CDHH, Cdht, H-cadherin, Heart-cadherin, P105, T-CAD, T-CADHERIN, Truncated-cadherin | cadherin 13 | Plasma Membrane | other | 1012 |
| CDS1 | 4833409J18Rik, AI314024, AW125888, CDP-diacylglycerol synthase 1 | CDP-diacylglycerol synthase 1 | Cytoplasm | enzyme | 1040 |
| CELSR2 | ADGRC2, cadherin EGF LAG seven-pass G-type receptor 2, cadherin, EGF LAG seven-pass G-type receptor 2, CDHF10, EGFL2, flamingo, Flamingo1, Fmi, MEGF3, mfmi1, mKIAA0279 | cadherin EGF LAG seven-pass G-type receptor 2 | Plasma Membrane | G-protein coupled receptor | 1952 |
| CENPN | 2610510J17Rik, AI426416, AW545024, BM039, C16orf60, centromere protein N, Da2-27, Da2-4, ICEN32, RGD1310953 | centromere protein N | Nucleus | other | 55839 |
| COL18A1 | COLLAGEN type XVIII, collagen, type XVIII, alpha 1, collagen type XVIII alpha 1 chain, collagen, type XVIII, α 1, collagen type XVIII α 1 chain, collagen XVIII, Endostatin, KNO, KNO1, KS, MFP, Procollagen, Type XVIII | collagen type XVIII alpha 1 chain | Extracellular Space | other | 80781 |
| COL21A1 | COLA1L, collagen type XXI alpha 1 chain, collagen type XXI α 1 chain, FP633 | collagen type XXI alpha 1 chain | Extracellular Space | other | 81578 |
| CORO2B | CLIPINC, COR5, coronin 2B, coronin, actin binding protein, 2B, E130012P22RIK | coronin 2B | Plasma Membrane | other | 10391 |
| CTNNAL1 | ACRP, AI616177, alpha CATENIN LIKE, alpha-CATU, alpha CATULIN, AW545119, C86009, catenin alpha-like 1, catenin (cadherin associated protein), alpha-like 1, catenin (cadherin associated protein), α-like 1, catenin α-like 1, CATNAL1, CLLP, Ctnnal1 predicted, α CATENIN LIKE, α-CATU, α CATULIN | catenin alpha like 1 | Plasma Membrane | other | 8727 |
| CTSS | cathepsin S, CatS, CS | cathepsin S | Cytoplasm | peptidase | 1520 |
| CYP4F22 | 4732474A20Rik, ARCI5, Cyp4f39, cytochrome P450 family 4 subfamily F member 22, cytochrome P450, family 4, subfamily f, polypeptide 39, INLNE, LI3, RGD1308796 | cytochrome P450 family 4 subfamily F member 22 | Extracellular Space | enzyme | 126410 |
| DPYSL3 | CRMP-4, dihydropyrimidinase-like 3, DIHYDROPYRIMIDINASE RELATED protein-3, DRP-3, LCRMP, TUC4, ULIP, ULIP-1 | dihydropyrimidinase like 3 | Cytoplasm | enzyme | 1809 |
| DTHD1 | death domain containing 1, Gm17384 | death domain containing 1 | Other | other | 401124 |
| EGFL6 | EGF like domain multiple 6, EGF-like-domain, multiple 6, MAEG, W80 | EGF like domain multiple 6 | Extracellular Space | other | 25975 |
| ENO1 | 0610008I15, AL022784, EG433182, Eno1b, ENO1L1, ENOLASE, ENOLASE 1, Enolase 1 alpha, enolase 1, alpha non-neuron, enolase 1B, retrotransposed, Enolase 1 α, enolase 1, α non-neuron, Enolase α, Gm5506, HEL-S-17, LOC100503183, MBP-1, MPB1, NNE, Phosphopyruvate hydratase, PPH, α enolase | enolase 1 | Cytoplasm | enzyme | 2023 |
| ERK | p42/44 mapk |  | Other | group |  |
| FCER1A | FCE1A, Fc Epsilon R1, Fc Epsilon R1 Alpha, FC epsilon RI, FcERI, Fc fragment of IgE receptor Ia, Fcr-5, Fc receptor, IgE, high affinity I, alpha polypeptide, Fc receptor, IgE, high affinity I, α polypeptide, Fc ε R1, FC ε R1 α, FC ε RI, Ig epsilon RI, Iger01, Ig ε RI, RATIGER01 | Fc fragment of IgE receptor Ia | Plasma Membrane | transmembrane receptor | 2205 |
| FOXM1 | AA408308, AW554517, BB238854, D1Mgi56, Fkh16, FKHL16, FOCM1, forkhead box M1, FOXM1B, HFH-11, HFH-11B, HNF-3, INS-1, MPHOSPH2, MPM2, MPP-2, PIG29, TRIDENT, WIN | forkhead box M1 | Nucleus | transcription regulator | 2305 |
| GAPDH | 1,3-Bgd, BARS-38, G3P, G3PD, G3PDH, GAPD, Gapdh-ps15, glyceraldehyde-3-phosphate dehydrogenase, glyceraldehyde-3-phosphate dehydrogenase, pseudogene 15, Gm20899, HEL-S-162eP, LOC14433, NUCLEAR URACIL DNA GLYCOSYLASE | glyceraldehyde-3-phosphate dehydrogenase | Cytoplasm | enzyme | 2597 |
| GAS2L2 | CILD41, GAR17, Gas2, growth arrest-specific 2 like 2, LOC100912215, LOC103694862 | growth arrest specific 2 like 2 | Cytoplasm | other | 246176 |
| GJB7 | bA136M9.1, connexin25, CX25, gap junction protein beta 7, gap junction protein β 7, LOC728362 | gap junction protein beta 7 | Other | other | 375519 |
| H19 | AI747191, ASM1, ASM, BWS, D11S813E, EyeLinc6, H19 fetal liver, H19 foetal liver, H19 imprinted maternally expressed transcript, H19, imprinted maternally expressed transcript, H19, imprinted maternally expressed transcript (non-protein coding), LINC00008, MIR675HG, NCRNA00008, PRO2605, WT2 | H19 imprinted maternally expressed transcript | Cytoplasm | other | 283120 |
| HMGA1 | AL023995, high mobility group AT-hook 1, high mobility group AT-hook 1B, HMG1(Y), Hmga1b, Hmga1-rs1, Hmgi, Hmgi-rs1, HMGIY, HMG-I(Y), HMG(I)Y, HMG-R, Hmgy, Hmg-y/i, LOC689053 | high mobility group AT-hook 1 | Nucleus | transcription regulator | 3159 |
| HSPG2 | AI852380, BASEMENT MEMBRANE SPECIFIC HEPARAN SULFATE PROTEOGLYCAN CORE, BASEMENT MEMBRANE SPECIFIC HEPARAN sulphATE PROTEOGLYCAN CORE, ENDOREPELLIN, Heparan Sulfate Proteoglycan 2, Heparan sulphate Proteoglycan 2, HSPG, LOC100047061, Pcn, Per, Perlecan, perlecan (heparan sulfate proteoglycan 2), perlecan (heparan sulphate proteoglycan 2), PLC, PRCAN, SJA, SJS, SJS1 | heparan sulfate proteoglycan 2 | Extracellular Space | enzyme | 3339 |
| IL5RA | CD125, CDw125, HSIL5R3, IL5R, Il-5r-α, interleukin 5 receptor, alpha, interleukin 5 receptor subunit alpha, interleukin 5 receptor subunit α, interleukin 5 receptor, α | interleukin 5 receptor subunit alpha | Plasma Membrane | transmembrane receptor | 3568 |
| LDLRAD4 | 8230401C20Rik, A430083H02, A430108L08Rik, C18orf1, D18Ertd653e, D330030L18Rik, low density lipoprotein receptor class A domain containing 4 | low density lipoprotein receptor class A domain containing 4 | Cytoplasm | other | 753 |
| LTB4R | BLT1, Blt1r, BLTR, CMKRL1, GPR16, leukotriene B4 receptor, leukotriene B4 receptor 1, LTB4R1, LTBR1, mBLTR, P2RY7, P2Y7 | leukotriene B4 receptor | Plasma Membrane | G-protein coupled receptor | 1241 |
| LTF | Csp82, GIG12, HEL110, HLF2, lactotransferrin, LF, LOC102724305, MMS10R, Ms10r, TRFL | lactotransferrin | Extracellular Space | peptidase | 4057 |
| MAB21L4 | 2310007B03Rik, C2orf54, mab-21-like 4, RGD1563692 | mab-21 like 4 | Other | other | 79919 |
| MAOB | 6330414K01Rik, monoamine oxidase B | monoamine oxidase B | Cytoplasm | enzyme | 4129 |
| MAP3K6 | ASK2, MAPKKK6, MEKK6, mitogen-activated protein kinase kinase kinase 6 | mitogen-activated protein kinase kinase kinase 6 | Other | kinase | 9064 |
| MAP6 | 2810411E12Rik, KIAA1878, MAP6-N, microtubule-associated protein 6, MTAP6, N-STOP, STOP | microtubule associated protein 6 | Cytoplasm | other | 4135 |
| MHC II | HLA-DR, MHC Class II, MHC Class II Antigen RT1, MHC class II gene cluster, MHC LOCUS CLASS II, RT1 |  | Plasma Membrane | group |  |
| MMP28 | D130023P12, EPILYSIN, LOC100912318, LOC103694864, matrix metallopeptidase 28, matrix metallopeptidase 28 (epilysin), matrix metalloproteinase-28-like, MM28, MMP-25 | matrix metallopeptidase 28 | Extracellular Space | peptidase | 79148 |
| MMP9 | AW743869, B/MMP9, CLG4B, COLLAGENASE type IV, Gelatinase B, GELB, Gl 92-kda, MANDP2, matrix metallopeptidase 9, METALLOPROTEINASE 9, pro-MMP-9 | matrix metallopeptidase 9 | Extracellular Space | peptidase | 4318 |
| MYH9 | BDPLT6, DFNA17, EPSTS, FLTN, FTNS, MATINS, MHA, MIIA, MNMM IIA, Myh9l1, Myhn-1, Myosib IIA, MYOSIN HEAVY CHAIN 9, myosin heavy chain 9-like 1, myosin, heavy polypeptide 9, non-muscle, Myosin IIA, Myosin IIA Heavy Chain, NM2A, NMHC-II-A, NM-IIA, NMMHC-A, NMMHC-IIA, NONMUSCLE MYOSIN2 HEAVY CHAIN type A, TU72.6 | myosin heavy chain 9 | Cytoplasm | enzyme | 4627 |
| NGFR | CD271, FL-P75NTR, fNGFR, Gp80-LNGFR, LNGFR, nerve growth factor receptor, nerve growth factor receptor (TNFR superfamily, member 16), Ngf Receptor Subtype1, Np75, p75, p75lnfgr, p75LNGFR, p75 NEUROTROPHIN receptor, p75NGFR, p75NTR, p75(NTR), RNNGFRR, TNFRSF16 | nerve growth factor receptor | Plasma Membrane | transmembrane receptor | 4804 |
| NMU | neuromedin U, NMU-23, NMU25, Nmu-r1 | neuromedin U | Extracellular Space | other | 10874 |
| NRGN | 0710001B06Rik, AI838505, BICKS, hng, neurogranin, NG, NG/RC3, Pss1, R75334, RC3 | neurogranin | Cytoplasm | other | 4900 |
| PALM | KIAA0270, PALM1, PARALEMMIN | paralemmin | Plasma Membrane | other | 5064 |
| PAX7 | HUP1, LOC284530, MYOSCO, paired box 7, PAX7B, RGD1564360, RMS2 | paired box 7 | Nucleus | transcription regulator | 5081 |
| PBK | 2810434B10Rik, 3A11 Ag, AW538537, CT84, D14Ertd732e, HEL164, Nori-3, PDZ binding kinase, SPERMATOGENESIS RELATED protein KINASE, SPK, TOPK | PDZ binding kinase | Cytoplasm | kinase | 55872 |
| PBLD | 0610038K03Rik, HEL-S-306, MAWBP, MAWDBP, Pbld1, Pbld2, phenazine biosynthesis like protein domain containing, phenazine biosynthesis-like protein domain containing 1, phenazine biosynthesis-like protein domain containing 2 | phenazine biosynthesis like protein domain containing | Cytoplasm | enzyme | 64081 |
| PDPN | AGGRUS, D2-40, E11, GP36, Gp38, GP40, HT1A-1, OTS-8, PA2.26, PODOPLANIN, RANDAM-2, RTI40, T1A, T1A-2, T1-alpha, T1-α, TI1A | podoplanin | Plasma Membrane | other | 10630 |
| PLCB3 | LOC283126, mKIAA4098, phospholipase C beta 3, phospholipase C, beta 3, Phospholipase c β 3, phospholipase C, β 3, PLC beta3 | phospholipase C beta 3 | Cytoplasm | enzyme | 5331 |
| PRUNE2 | 6330414G02Rik, A230083H22Rik, A330102H22Rik, BMCC1, BNIPXL, C9orf65, KIAA0367, LOC100129762, mKIAA0367, prune homolog 2, prune homolog 2 with BCH domain, RGD1311350 | prune homolog 2 with BCH domain | Cytoplasm | other | 158471 |
| PTPRN2 | 4930425H11RIK, IA-2, IA-2beta, Ia2 β, IAR, ICAAR, KIAA0387, mKIAA0387, phogrin, PHOL, protein tyrosine phosphatase receptor type N2, protein tyrosine phosphatase, receptor type N2, protein tyrosine phosphatase, receptor type, N polypeptide 2, PTPNE6, PTP-NP, PTPRN2 isoform 1, PTPRP, R-PTP-N2, TRANSMEMBRANE-type protein TYROSINE PHOSPHATASE II | protein tyrosine phosphatase receptor type N2 | Plasma Membrane | phosphatase | 5799 |
| RAB36 | 6330593L16Rik, AW047545, LOC686984, RAB36, member RAS oncogene family | RAB36, member RAS oncogene family | Cytoplasm | enzyme | 9609 |
| RAB3B | 2610528C18Rik, RAB3B, member RAS oncogene family | RAB3B, member RAS oncogene family | Cytoplasm | enzyme | 5865 |
| RARG | LOC683586, NR1B3, Rar gamma, Rar γ, RARC, RARD, retinoic acid receptor gamma, retinoic acid receptor γ, retinoic acid receptor, gamma, retinoic acid receptor, γ | retinoic acid receptor gamma | Nucleus | ligand-dependent nuclear receptor | 5916 |
| REEP4 | 2700029E10Rik, C8orf20, PP432, receptor accessory protein 4, RGD1306561, Yip2c | receptor accessory protein 4 | Cytoplasm | other | 80346 |
| RHEBL1 | 1810036J22RIK, Ras homolog enriched in brain like 1, Rheb2, RHEBL1c, RHEB like 1 | RHEB like 1 | Cytoplasm | enzyme | 121268 |
| RIPOR2 | Ab2-162, Al225904, C6orf32, DFNB104, DIFF40, DIFF48, E430013J17Rik, FAM65B, LOC101928642, MYONAP, PL48, RGD1306939, RHO family interacting cell polarization regulator 2 | RHO family interacting cell polarization regulator 2 | Cytoplasm | other | 9750 |
| RORC | IMD42, NR1F3, RAR related orphan receptor C, RAR-related orphan receptor gamma, RAR-related orphan receptor γ, RORC2, RORG, RORgammat, Ror-γ, RZRG, RZR-GAMMA, RZR-γ, Thor, TOR | RAR related orphan receptor C | Nucleus | ligand-dependent nuclear receptor | 6097 |
| SLC13A3 | ARLIAK, NADC3, SDCT2, solute carrier family 13 member 3, solute carrier family 13 (sodium-dependent dicarboxylate transporter), member 3 | solute carrier family 13 member 3 | Plasma Membrane | transporter | 64849 |
| SLC19A1 | AI323572, CHMD, FOLT, hRFC, hSLC19A1, IFC-1, LOC101928717, MTX-1, REFC, RFC, RFC-1, solute carrier family 19 (folate transporter), member 1, solute carrier family 19 member 1 | solute carrier family 19 member 1 | Plasma Membrane | transporter | 6573 |
| SLC9A3 | 9030624O13RIK, AI930210, DIAR8, NHE-3, solute carrier family 9 member A3, solute carrier family 9 (sodium/hydrogen exchanger), member 3 | solute carrier family 9 member A3 | Plasma Membrane | ion channel | 6550 |
| SMOX | B130066H01RIK, C20orf16, PAO, PAO-1, PAOH, PAOH1, Polyamine oxidase 1, SMO, Spermine oxidase | spermine oxidase | Cytoplasm | enzyme | 54498 |
| SMPD3 | 4631433G07Rik, AI427456, AW537966, cca1, FLJ22593, fro, NSMASE2, sphingomyelin phosphodiesterase 3, sphingomyelin phosphodiesterase 3, neutral | sphingomyelin phosphodiesterase 3 | Cytoplasm | enzyme | 55512 |
| SOCS2 | 8030460M17, AI527257, AW108012, CIS2, Cish2, D130043N08RIK, hg, JAB, SSI-2, STATI2, suppressor of cytokine signaling 2 | suppressor of cytokine signaling 2 | Cytoplasm | other | 8835 |
| STK33 | 4921505G21Rik, AW061264, LOC105376537, LOC687171, serine/threonine kinase 33 | serine/threonine kinase 33 | Cytoplasm | kinase | 65975 |
| STX2 | AW538950, EPIM, Epimorphin, EPM, G1-536-1, repro34, STX2A, STX2B, STX2C, Syn-2, Syntaxin 2 | syntaxin 2 | Cytoplasm | transporter | 2054 |
| SYNE1 | 8B, A330049M09Rik, AMCM, ARCA1, BE692247, C130039F11Rik, C6orf98, CPG2, dJ45H2.2, EDMD4, KASH1, LOC102546492, mKIAA1756, MYNE1, Nesp1, NESPRIN-1, SCAR8, spectrin repeat containing, nuclear envelope 1, spectrin repeat containing nuclear envelope protein 1, Synaptic Nuclei Expressed Gene1 β, SYNE-1A | spectrin repeat containing nuclear envelope protein 1 | Nucleus | other | 23345 |
| TEAD4 | EFTR-2, ETFR-2, FR-19, hRTEF-1B, RTEF1, TCF13L1, Tcf13r1, TEA domain family member 4, TEA domain transcription factor 4, TEF-3, Tefr, TEFR-1, Tefr1a | TEA domain transcription factor 4 | Nucleus | transcription regulator | 7004 |
| TK1 | D530002A18Rik, Thymidine Kinase 1, Tk, Tk1a, Tk1b, TK2 | thymidine kinase 1 | Cytoplasm | kinase | 7083 |
| TKT | HEL107, HEL-S-48, p68, SDDHD, TK, TKT1, TRANSKETOLASE | transketolase | Cytoplasm | enzyme | 7086 |
| TP63 | AI462811, AIS, B(p51A), B(p51B), Delta N p63, Delta N p63 Alpha, EEC3, KET, LMS, NBP, OFC8, P51/P63, p53CP, p63, p63 alpha isoform, p63 gamma isoform, p63/p40, p63 α isoform, p63 γ isoform, p73H, P73l, RHS, SHFM4, TAp63, TP53CP, TP53L, TP73L, transformation related protein 63, Trp53rp1, Trp63, TUMOR protein 63 KDA with STRONG HOMOLOGY TO P53, tumor protein p63, tumour protein 63 KDA with STRONG HOMOLOGY TO P53, tumour protein p63, δ N p63, δ N p63 α | tumor protein p63 | Nucleus | transcription regulator | 8626 |
| TPI1 | AI255506, HEL-S-49, LOC100911515, TIM, TPI, TPID, Triosephosphate isomerase, Triosephosphate isomerase 1, triosephosphate isomerase-like | triosephosphate isomerase 1 | Cytoplasm | enzyme | 7167 |
| TUBB | AA408537, AI596182, B130022C14RIK, Beta tubulin, Beta tubulin 1, CDCBM6, CSCSC1, M40, M(beta)5, M(β)5, OK/SW-cl.56, TUBB1, TUBB5, TUBULIN beta 5, tubulin, beta 5 class I, tubulin beta class I, tubulin, beta class I, TUBULIN β 5, tubulin, β 5 class I, tubulin β class I, tubulin, β class I, β tubulin, β tubulin 1 | tubulin beta class I | Cytoplasm | other | 203068 |
| TYRO3 | AI323366, Brt, BYK, Dtk, Etk-2, etk2/tyro3, Rek, RSE, Sky, Tif, tk19-1, TK19-2, Tyro2, TYRO3 protein tyrosine kinase, TYRO3 protein tyrosine kinase 3 | TYRO3 protein tyrosine kinase | Plasma Membrane | kinase | 7301 |
| UBXN10 | 5730509E04Rik, A830047D02, UBXD3, UBX domain protein 10 | UBX domain protein 10 | Extracellular Space | other | 127733 |
| VSNL1 | HLP3, HPCAL3, HUVISL1, Nvp-1, Ratnvp1, VILIP, VILIP-1, visinin-like 1, Vnsl1 | visinin like 1 | Cytoplasm | other | 7447 |
| ZNF488 | Gm1206, Zfp488, zinc finger protein 488 | zinc finger protein 488 | Nucleus | transcription regulator | 118738 |

**Supplementary Table 6. Asthma-related differentially expressed genes which are connected in the network**

| **Symbol** | **Synonym(s)** | **Entrez Gene Name** | **Location** | **Family** | **Entrez Gene ID for Human** |
| --- | --- | --- | --- | --- | --- |
| BCAM | 1200005K12Rik, AU, basal cell adhesion molecule, basal cell adhesion molecule (Lutheran blood group), CD239, Gplu, LU, LUTHERAN, Lutheran blood group, MSK19 | basal cell adhesion molecule (Lutheran blood group) | Plasma Membrane | transmembrane receptor | 4059 |
| BUB1 | AL022991, BUB1 mitotic checkpoint serine/threonine kinase, BUB1, mitotic checkpoint serine/threonine kinase, BUB1A, BUB1L, C80208, D2Xrf87, hBUB1 | BUB1 mitotic checkpoint serine/threonine kinase | Nucleus | kinase | 699 |
| CD44 | 216062 AT, AU023126, AW121933, AW146109, CD44 (containing exon 5), CD44 (soluble), CD44 Antigen, CD44 molecule (Indian blood group), CD44 STANDARD FROM, CD44A, Cd44i, CDW44, CSPG8, ECMR-III, Epican, HCELL, HERMES, Hermes antigen, HUTCH-I, IN, LHR, Ly-24, MC56, MDU2, MDU3, METAA, MIC4, NKT.44, Pgp-1, RHAMM | CD44 molecule (Indian blood group) | Plasma Membrane | other | 960 |
| CDC25B | AI604853, CDC25HU2, cell division cycle 25B | cell division cycle 25B | Nucleus | phosphatase | 994 |
| CDH13 | 4932416G01Rik, CADHERIN 13, CDHH, Cdht, H-cadherin, Heart-cadherin, P105, T-CAD, T-CADHERIN, Truncated-cadherin | cadherin 13 | Plasma Membrane | other | 1012 |
| COL18A1 | COLLAGEN type XVIII, collagen type XVIII alpha 1 chain, collagen type XVIII α 1 chain, collagen XVIII, collagen, type XVIII, alpha 1, collagen, type XVIII, α 1, Endostatin, KNO1, KNO, KS, MFP, Procollagen, Type XVIII | collagen type XVIII alpha 1 chain | Extracellular Space | other | 80781 |
| CTSS | cathepsin S, CatS, CS | cathepsin S | Cytoplasm | peptidase | 1520 |
| ENO1 | 0610008I15, AL022784, EG433182, Eno1b, ENO1L1, ENOLASE, ENOLASE 1, Enolase 1 alpha, Enolase 1 α, enolase 1, alpha non-neuron, enolase 1, α non-neuron, enolase 1B, retrotransposed, Enolase α, Gm5506, HEL-S-17, LOC100503183, MBP-1, MPB1, NNE, Phosphopyruvate hydratase, PPH, α enolase | enolase 1 | Cytoplasm | enzyme | 2023 |
| ERK | p42/44 mapk | | Other | group |
| FCER1A | Fc Epsilon R1, Fc Epsilon R1 Alpha, FC epsilon RI, Fc fragment of IgE receptor Ia, Fc receptor, IgE, high affinity I, alpha polypeptide, Fc receptor, IgE, high affinity I, α polypeptide, Fc ε R1, FC ε R1 α, FC ε RI, FCE1A, FcERI, Fcr-5, Ig epsilon RI, Ig ε RI, Iger01, RATIGER01 | Fc fragment of IgE receptor Ia | Plasma Membrane | transmembrane receptor | 2205 |
| FOXM1 | AA408308, AW554517, BB238854, D1Mgi56, Fkh16, FKHL16, FOCM1, forkhead box M1, FOXM1B, HFH-11, HFH-11B, HNF-3, INS-1, MPHOSPH2, MPM2, MPP-2, PIG29, TRIDENT, WIN | forkhead box M1 | Nucleus | transcription regulator | 2305 |
| GAPDH | 1,3-Bgd, BARS-38, G3P, G3PD, G3PDH, GAPD, Gapdh-ps15, glyceraldehyde-3-phosphate dehydrogenase, glyceraldehyde-3-phosphate dehydrogenase, pseudogene 15, Gm20899, HEL-S-162eP, LOC14433, NUCLEAR URACIL DNA GLYCOSYLASE | glyceraldehyde-3-phosphate dehydrogenase | Cytoplasm | enzyme | 2597 |
| HMGA1 | AL023995, high mobility group AT-hook 1, high mobility group AT-hook 1B, HMG(I)Y, HMG-I(Y), HMG-R, Hmg-y/i, HMG1(Y), Hmga1-rs1, Hmga1b, Hmgi, Hmgi-rs1, HMGIY, Hmgy, LOC689053 | high mobility group AT-hook 1 | Nucleus | transcription regulator | 3159 |
| HSPG2 | AI852380, BASEMENT MEMBRANE SPECIFIC HEPARAN SULFATE PROTEOGLYCAN CORE, BASEMENT MEMBRANE SPECIFIC HEPARAN sulphATE PROTEOGLYCAN CORE, ENDOREPELLIN, Heparan Sulfate Proteoglycan 2, Heparan sulphate Proteoglycan 2, HSPG, LOC100047061, Pcn, Per, Perlecan, perlecan (heparan sulfate proteoglycan 2), perlecan (heparan sulphate proteoglycan 2), PLC, PRCAN, SJA, SJS1, SJS | heparan sulfate proteoglycan 2 | Extracellular Space | enzyme | 3339 |
| IL5RA | CD125, CDw125, HSIL5R3, Il-5r-α, IL5R, interleukin 5 receptor subunit alpha, interleukin 5 receptor subunit α, interleukin 5 receptor, alpha, interleukin 5 receptor, α | interleukin 5 receptor subunit alpha | Plasma Membrane | transmembrane receptor | 3568 |
| LDLRAD4 | 8230401C20Rik, A430083H02, A430108L08Rik, C18orf1, D18Ertd653e, D330030L18Rik, low density lipoprotein receptor class A domain containing 4 | low density lipoprotein receptor class A domain containing 4 | Cytoplasm | other | 753 |
| LTB4R | BLT1, Blt1r, BLTR, CMKRL1, GPR16, leukotriene B4 receptor, leukotriene B4 receptor 1, LTB4R1, LTBR1, mBLTR, P2RY7, P2Y7 | leukotriene B4 receptor | Plasma Membrane | G-protein coupled receptor | 1241 |
| LTF | Csp82, GIG12, HEL110, HLF2, lactotransferrin, LF, LOC102724305, MMS10R, Ms10r, TRFL | lactotransferrin | Extracellular Space | peptidase | 4057 |
| MMP28 | D130023P12, EPILYSIN, LOC100912318, LOC103694864, matrix metallopeptidase 28, matrix metallopeptidase 28 (epilysin), matrix metalloproteinase-28-like, MM28, MMP-25 | matrix metallopeptidase 28 | Extracellular Space | peptidase | 79148 |
| MMP9 | AW743869, B/MMP9, CLG4B, COLLAGENASE type IV, Gelatinase B, GELB, Gl 92-kda, MANDP2, matrix metallopeptidase 9, METALLOPROTEINASE 9, pro-MMP-9 | matrix metallopeptidase 9 | Extracellular Space | peptidase | 4318 |
| MYH9 | BDPLT6, DFNA17, EPSTS, FLTN, FTNS, MATINS, MHA, MIIA, MNMM IIA, Myh9l1, Myhn-1, Myosib IIA, MYOSIN HEAVY CHAIN 9, myosin heavy chain 9-like 1, Myosin IIA, Myosin IIA Heavy Chain, myosin, heavy polypeptide 9, non-muscle, NM-IIA, NM2A, NMHC-II-A, NMMHC-A, NMMHC-IIA, NONMUSCLE MYOSIN2 HEAVY CHAIN type A, TU72.6 | myosin heavy chain 9 | Cytoplasm | enzyme | 4627 |
| NGFR | CD271, FL-P75NTR, fNGFR, Gp80-LNGFR, LNGFR, nerve growth factor receptor, nerve growth factor receptor (TNFR superfamily, member 16), Ngf Receptor Subtype1, Np75, p75, p75 NEUROTROPHIN receptor, p75(NTR), p75lnfgr, p75LNGFR, p75NGFR, p75NTR, RNNGFRR, TNFRSF16 | nerve growth factor receptor | Plasma Membrane | transmembrane receptor | 4804 |
| PBK | 3A11 Ag, 2810434B10Rik, AW538537, CT84, D14Ertd732e, HEL164, Nori-3, PDZ binding kinase, SPERMATOGENESIS RELATED protein KINASE, SPK, TOPK | PDZ binding kinase | Cytoplasm | kinase | 55872 |
| PDPN | AGGRUS, D2-40, E11, GP36, Gp38, GP40, HT1A-1, OTS-8, PA2.26, PODOPLANIN, RANDAM-2, RTI40, T1-alpha, T1-α, T1A, T1A-2, TI1A | podoplanin | Plasma Membrane | other | 10630 |
| PLCB3 | LOC283126, mKIAA4098, phospholipase C beta 3, Phospholipase c β 3, phospholipase C, beta 3, phospholipase C, β 3, PLC beta3 | phospholipase C beta 3 | Cytoplasm | enzyme | 5331 |
| PTPRN2 | 4930425H11RIK, IA-2, IA-2beta, Ia2 β, IAR, ICAAR, KIAA0387, mKIAA0387, phogrin, PHOL, protein tyrosine phosphatase receptor type N2, protein tyrosine phosphatase, receptor type N2, protein tyrosine phosphatase, receptor type, N polypeptide 2, PTP-NP, PTPNE6, PTPRN2 isoform 1, PTPRP, R-PTP-N2, TRANSMEMBRANE-type protein TYROSINE PHOSPHATASE II | protein tyrosine phosphatase receptor type N2 | Plasma Membrane | phosphatase | 5799 |
| RAB36 | 6330593L16Rik, AW047545, LOC686984, RAB36, member RAS oncogene family | RAB36, member RAS oncogene family | Cytoplasm | enzyme | 9609 |
| RAB3B | 2610528C18Rik, RAB3B, member RAS oncogene family | RAB3B, member RAS oncogene family | Cytoplasm | enzyme | 5865 |
| RORC | IMD42, NR1F3, RAR related orphan receptor C, RAR-related orphan receptor gamma, RAR-related orphan receptor γ, Ror-γ, RORC2, RORG, RORgammat, RZR-GAMMA, RZR-γ, RZRG, Thor, TOR | RAR related orphan receptor C | Nucleus | ligand-dependent nuclear receptor | 6097 |
| SMOX | B130066H01RIK, C20orf16, PAO, PAO-1, PAOH1, PAOH, Polyamine oxidase 1, SMO, Spermine oxidase | spermine oxidase | Cytoplasm | enzyme | 54498 |
| SOCS2 | 8030460M17, AI527257, AW108012, CIS2, Cish2, D130043N08RIK, hg, JAB, SSI-2, STATI2, suppressor of cytokine signaling 2 | suppressor of cytokine signaling 2 | Cytoplasm | other | 8835 |
| STX2 | AW538950, EPIM, Epimorphin, EPM, G1-536-1, repro34, STX2A, STX2B, STX2C, Syn-2, Syntaxin 2 | syntaxin 2 | Cytoplasm | transporter | 2054 |
| TEAD4 | EFTR-2, ETFR-2, FR-19, hRTEF-1B, RTEF1, TCF13L1, Tcf13r1, TEA domain family member 4, TEA domain transcription factor 4, TEF-3, Tefr, TEFR-1, Tefr1a | TEA domain transcription factor 4 | Nucleus | transcription regulator | 7004 |
| TK1 | D530002A18Rik, Thymidine Kinase 1, TK2, Tk, Tk1a, Tk1b | thymidine kinase 1 | Cytoplasm | kinase | 7083 |
| TP63 | AI462811, AIS, B(p51A), B(p51B), Delta N p63, Delta N p63 Alpha, EEC3, KET, LMS, NBP, OFC8, p63, P51/P63, p53CP, p63 alpha isoform, p63 gamma isoform, p63 α isoform, p63 γ isoform, p63/p40, p73H, P73l, RHS, SHFM4, TAp63, TP53CP, TP53L, TP73L, transformation related protein 63, Trp63, Trp53rp1, TUMOR protein 63 KDA with STRONG HOMOLOGY TO P53, tumor protein p63, tumour protein 63 KDA with STRONG HOMOLOGY TO P53, tumour protein p63, δ N p63, δ N p63 α | tumor protein p63 | Nucleus | transcription regulator | 8626 |
| TPI1 | AI255506, HEL-S-49, LOC100911515, TIM, TPI, TPID, Triosephosphate isomerase, Triosephosphate isomerase 1, triosephosphate isomerase-like | triosephosphate isomerase 1 | Cytoplasm | enzyme | 7167 |

**Supplementary Table 7. Canonical pathways of transcriptome data for asthma-related terms**

| no. | Pathway name | Molecules |
| --- | --- | --- |
| 1 | Cardiac hypertrophy signaling | ADRB2, cyclooxygenase, ER, HDAC2, IFNG, IL5, IL13, IL25, IL33, IL12B, IL13RA2, IL1RL1, IL31RA, IL4R, IL5RA, LEP, MAP3K14, NGFR, PDIA3, PLCB3, PTGS2 |
| 2 | Th1 and Th2 activation pathway | CD4, CHD4, GATA3, IFNG, IL5, IL9, IL13, IL25, IL33, IL12B, IL1RL1, IL4R, SPI1, STAT6, TBX21, TSLP, VAV1 |
| 3 | T2 pathway | CD4, CHD4, GATA3, IFNG, IL5, IL9, IL13, IL25, IL33, IL12B, IL1RL1, IL4R, SPI1, STAT6, TBX21, TSLP, VAV1 |
| 4 | Glucocorticoid receptor signaling | ACTB, ADRB2, ANXA1, CCL11, CEBPA, cyclooxygenase, ERK, HSPA5, IFNG, IL5, IL13, MAP3K14, NR3C1, PGR, PTGS2 |
| 5 | Breast cancer regulation by stathmin1 | ADRB2, CHRM1, CHRM2, CHRM3, CHRM4, CHRM5, ERK, FOXM1, FPR2, LTB4R, MMP9, Muscarinic cholinergic receptor, PLCB3 |
| 6 | Dendritic cell maturation | COL18A1, ERK, Fcer1, IgG, IgG1kappa, IL33, IL12B, IL23A, LEP, MAP3K14, NGFR, PDIA3, PLCB3 |
| 7 | Role of macrophages, fibroblasts and endothelial cells in rheumatoid arthritis | C5, CEBPA, ERK, IgG, IgG1kappa, IL33, IL1RL1, IRAK3, MAP3K14, NGFR, PDIA3, PLCB3 |
| 8 | Hepatic cholestasis | ERK, IFNG, IL5, IL13, IL25, IL33, IL12B, IL1RL1, IRAK3, LEP, MAP3K14, NGFR |
| 9 | Systemic lupus erythematosus in B cell signaling pathway | ERK, IFNG, IgG, IGHE, IL5, IL13, IL25, IL33, IL12B, LEP, MAP3K14, VAV1 |
| 10 | T helper cell differentiation | Fcer1, GATA3, INFG, IL5, IL13, IL12B, IL4R, NGFR, RORC, STAT6, TBX21 |
| 11 | Airway pathology in chronic obstructive pulmonary disease | IFNG, IL5, IL13, IL22, IL25, IL33, IL12B, IL23A, LEP, MMP9, TSLP |
| 12 | G-protein coupled receptor signaling | ADRB2, CHRM1, CHRM2, CHRM3, CHRM4, CHRM5, ERK, FPR2, LTB4R, Muscarinic cholinergic receptor, PLCB3 |
| 13 | AMPK signaling | ACTB, ADIPOQ, ADRB2, CHRM2, CHRM3, CHRM4, CHRM5, ERK, LEP, Muscarinic cholinergic receptor |
| 14 | HMGB1 signaling | AGER, ERK, IFNG, IL5, IL13, IL25, IL33, IL12B, LEP, NGFR |
| 15 | Communication between innate and adaptive immune cells | CCL3L3, CD4, Fcer1, IFNG, IgG, IgG1 kappa, IGHE, IL5, IL33, IL12B |
| 16 | Tec kinase signaling | ACTB, ERK, Fcer1, FCER1A, IgE, IgG, ITK, MS4A2, STAT6, VAV1 |
| 17 | cAMP-mediated signaling | ADRB2, CHRM2, CHRM3, CHRM4, CHRM5, ERK, FPR2, LTB4R, muscarinic cholinergic receptor |
| 18 | Role of pattern recognition receptors in recognition of bacteria and viruses | C5, ERK, IFNG, IL5, IL13, IL25, IL33, IL12B, LEP |
| 19 | Granulocyte adhesion and diapedesis | C5, CCL11, CCL3L3, FPR2, IL33, IL1RL1, MMP9, MMP28, NGFR |
| 20 | Fc epsilon R1 signaling | ERK, Fcer1, FCER1A, IgE, IgG, IL5, IL13, MS4A2, VAV1 |

**Supplementary Table 8. Gene expressions predicting the sputum eosinophil count**

| **Genes** | **B** | ***P*-value** | **Exp (B)** | **95% C.I. for Exp (B)** | |
| --- | --- | --- | --- | --- | --- |
| **Lower** | **Upper** |
| RAB3B | 27.313 | 0.005 | 7.27829E+11 | 4113.867 | 1.29E+20 |
| SYNE1 | 10.316 | 0.002 | 90199.761 | 45.211 | 20172646.73 |
| STX2 | 7.092 | 0.013 | 1202.472 | 4.549 | 317851.436 |
| SMPD3 | 5.037 | 0.001 | 154.045 | 8.009 | 2962.81 |
| RORγt | 4.261 | <0.001 | 70.884 | 9.644 | 521.014 |

**Supplementary Table 9. Gene expressions predicting the sputum eosinophil count**

| Variables | AERD  (n = 12) | ATA  (n = 12) | *P* value |
| --- | --- | --- | --- |
| Age (years) | 43.4±12 | 36.5±7.3 | 0.77 |
| Gender (female, %) | 9 (75%) | 4 (33.3%) | 0.06 |
| Atopy (%) | 7 (58.3%) | 3 (25%) | 0.18 |
| Baseline FEV1(% Pred) | 92.3±10.5 | 95.5±14.5 | 0.63 |
| Baseline FEV1/FVC | 78.3±5.8 | 77.8±8.2 | 0.79 |
| Peripheral eosinophils (%) | 5.2±4.2 | 4.3±4.1 | 0.59 |
| Total IgE (KU/L) | 485.7±576.9 | 183.6±214.8 | 0.24 |

Values are given as n (%) for categorical variables and as mean ±SD for continuous variables. *P* values were analyzed by the Mann Whitney test. *AERD*: aspirin-exacerbated respiratory disease; *ATA*: aspirin tolerant asthma; *FEV1*: forced exhaled volume in 1 second; *FVC*, forced vital capacity; *IgE*: immunoglobulin E.

**Supplementary figure legend**

**Supplementary Fig. 1 Top 10 canonical pathway and heatmap results of disease and functions in AERD transcriptome data compared to ATA.**

**a** Genes are ranked by the negative log of the *P* value of the enrichment score. The color scheme is based on Z scores, with activation in orange and inhibition in blue. **b** The color scheme is presented based on Z scores, with activation in orange, inhibition in blue, and undetermined directionality in gray**.**
